# Supplementary material
Source: PubMed Central journal article supplement (PMC5836112)
Supplement: 10.1074_M117.819086_jbc.M117.819086-1.pdf [file 10.1074_M117.819086_jbc.M117.819086-1.pdf]

## Supplementary Figures and Legends

**Supplementary Figure S1. Expression of the ROMK1 and ROMK2 variants in yeast.** Western blots of lysate from yeast of the indicated genotype and expressing the indicated HA-tagged potassium channels or containing an empty vector control were probed with an anti-HA antibody. All blots were stripped and reprobed for glucose-6-phosphate dehydrogenase (G6PD) as a loading control.

**Supplementary Figure S2. ROMK1<sub>S44D+K80M</sub> expression increases resistance to the toxic cation Hygromycin B.** Yeast strains with the indicated genotype transformed with an empty expression vector control or vectors engineered to express Kir2.1, wild-type ROMK1, or ROMK1<sub>S44D+K80M</sub> were serially diluted onto growth medium supplemented with the indicated amounts of Hygromycin B (Hygro).

**Supplementary Figure S3. Deletion of genes encoding other endosomal sorting components improves the growth of potassium sensitive yeast expressing ROMK1<sub>S44D+K80M</sub>.** Yeast strains with the indicated genotypes transformed with an empty expression vector control or vectors engineered to express Kir2.1, wild-type ROMK1, or ROMK1<sub>S44D+K80M</sub> were serially diluted onto medium supplemented with the indicated amounts of KCl. All strains in this figure were identified in the high-throughput SGA screen and then reconstructed de novo. All experiments were performed in duplicate, and representative assays are shown.

**Supplementary Figure S4. Expression of human potassium channels in the indicated hits from the SGA screen.** Western blots were performed with lysates from yeast with the indicated genotypes and expressing the indicated potassium channels. Both Kir2.1 and the ROMK variants are HA-tagged. All blots were stripped and reprobed for glucose-6-phosphate dehydrogenase (G6PD) as a loading control.

**Supplementary Figure S5. Deletion of endocytosis component End3 allows for ROMK plasma membrane residency.** Western blots of sucrose gradient fractions showing migration of HA-tagged ROMK1<sub>S44D+K80M</sub> in *trk1Δtrk2Δ* (A) and *trk1Δtrk2Δend3Δ* (B) yeast. Two exposures of the HA immunoblot are shown. \* indicates an uncharacterized band that is likely a degradation product. Pma1 marks the plasma membrane-derived fractions while Sec61 marks ER-derived fractions. Note the population of ROMK that resides in fractions 13-17 that comigrates with Pma1. (C,D) Yeast strains with the indicated genotypes transformed with an empty expression vector control or vectors engineered to express Kir2.1, wild-type ROMK1, or ROMK1<sub>S44D+K80M</sub> were serially diluted onto medium supplemented with the indicated amounts of KCl. All strains in this figure were identified in the high-throughput SGA screen and then reconstructed de novo. All experiments were performed in duplicate, and representative assays are shown. Note: panel C is identical to Figure 5A.

**Supplementary Figure S6. Deletion of Retromer subunit Vps5 does not abrogate enhanced growth of ESCRT-deficient potassium sensitive yeast expressing ROMK1<sub>S44D+K80M</sub>.** Yeast strains with the indicated genotypes transformed with an empty expression vector control or vectors engineered to express Kir2.1, wild-type ROMK1, or ROMK1<sub>S44D+K80M</sub> were serially diluted onto medium supplemented with the indicated amounts of KCl. Images were captured after three days of growth at 30°C. All experiments were performed in duplicate, and representative assays are shown.

**Supplementary Figure S7. Deletion of recycling component Rcy1 does not abrogate enhanced growth of ESCRT-deficient potassium sensitive yeast expressing ROMK1<sub>S44D+K80M</sub>.** Yeast strains with the indicated genotypes transformed with an empty expression vector control or vectors engineered to express Kir2.1, wild-type ROMK1, or ROMK1<sub>S44D+K80M</sub> were serially diluted onto medium supplemented with the indicated amounts of KCl. Images were captured after three days of growth at 30°C. All experiments were performed in duplicate, and representative assays are shown. Note: panels A and B are identical to their counterparts in Supplementary Figure S6.

**Supplementary Figure S8. Deletion of ERAD E3 ubiquitin ligase Doa10 does not enhance growth of potassium sensitive yeast expressing ROMK1<sub>S44D+K80M</sub>.** Yeast strains with the indicated genotypes transformed with an empty expression vector control or vectors engineered to express Kir2.1, wild-type ROMK1, or ROMK1<sub>S44D+K80M</sub> were serially diluted onto medium supplemented with the indicated amounts of KCl. Images were captured after two days of growth at 30°C. All experiments were performed in duplicate, and representative assays are shown.

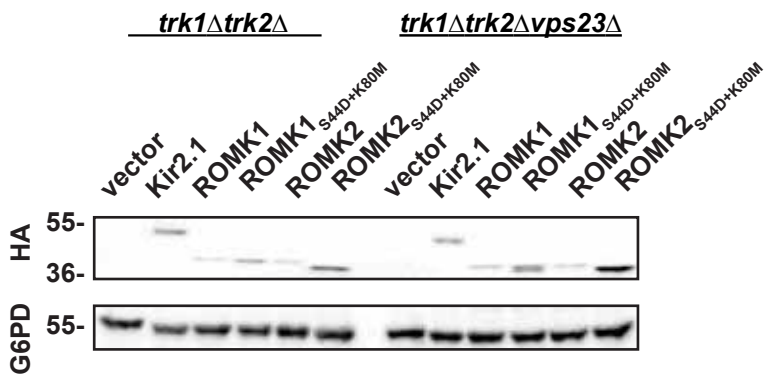

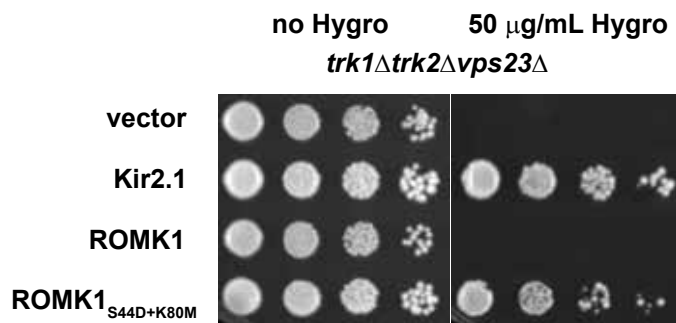

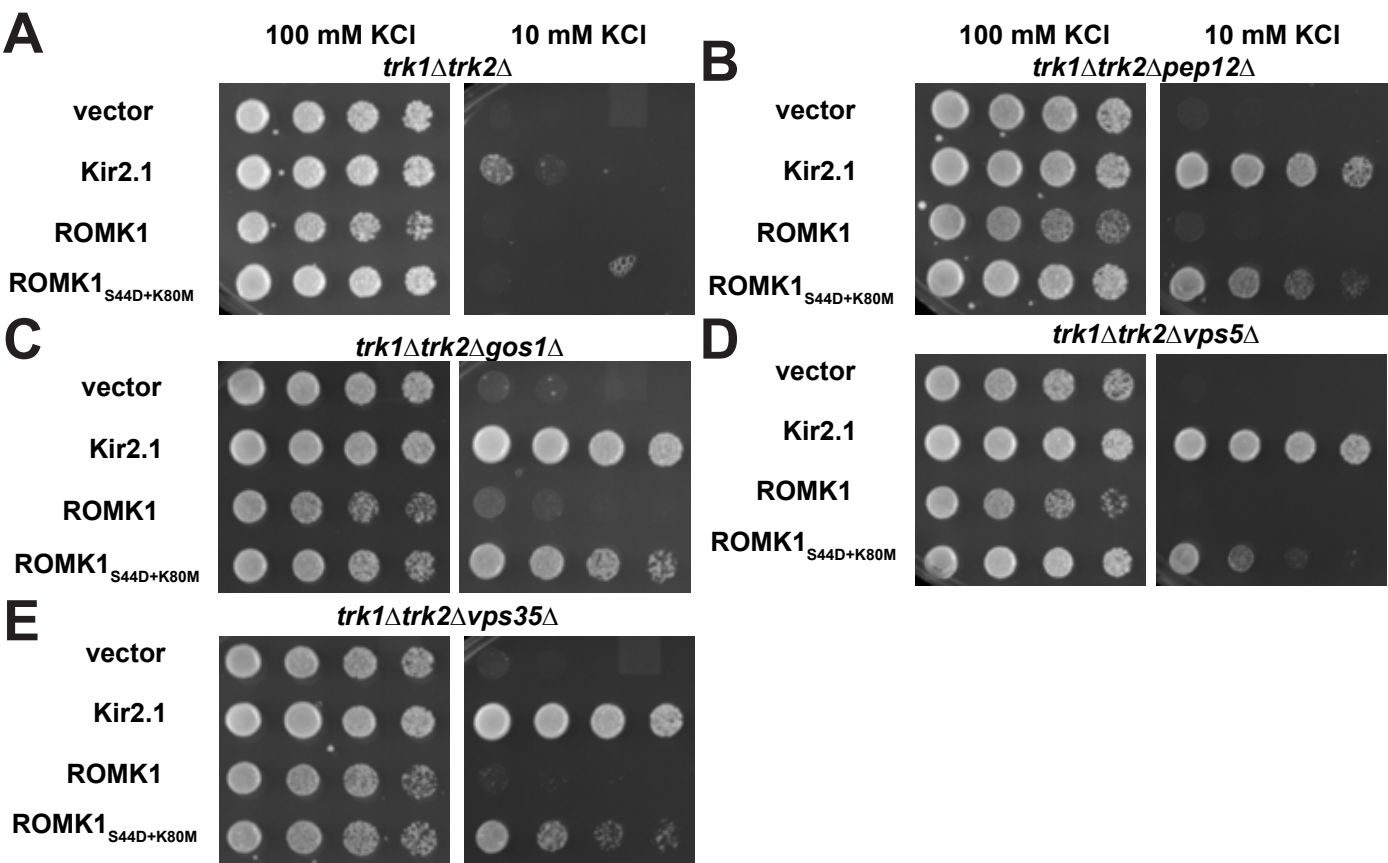

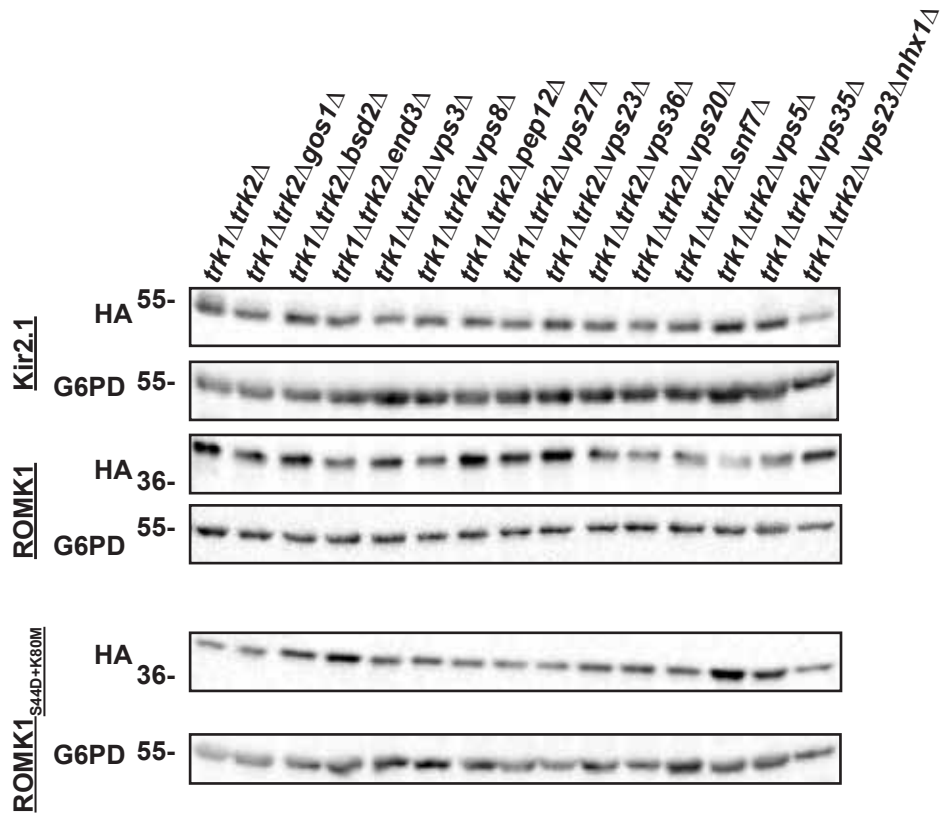

**A**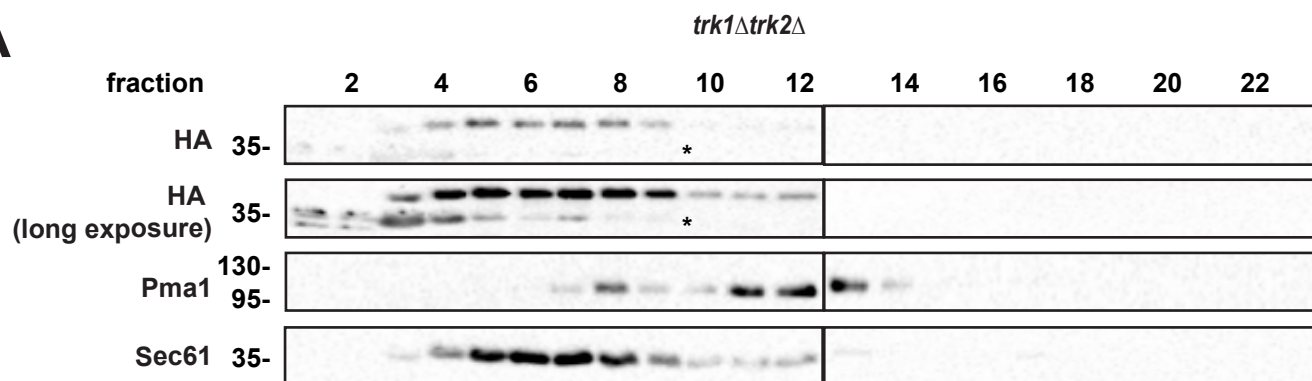**B**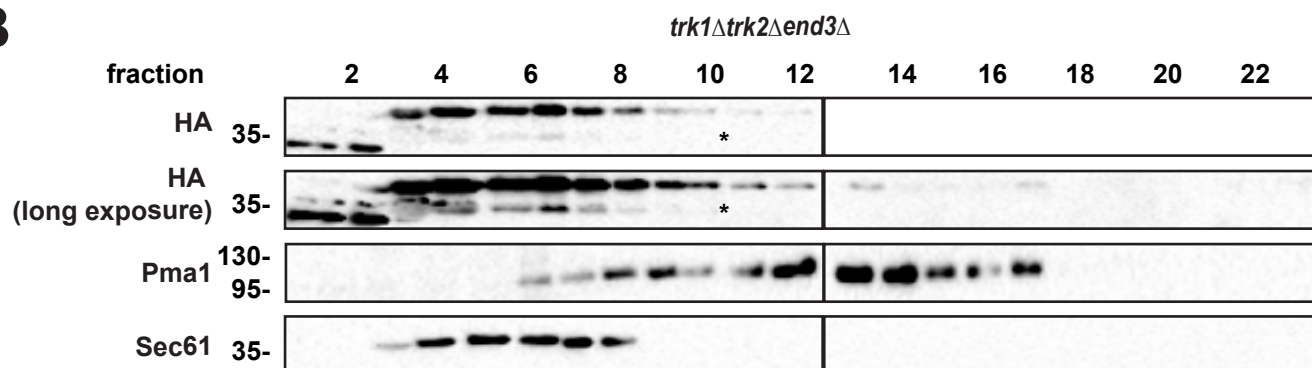**C**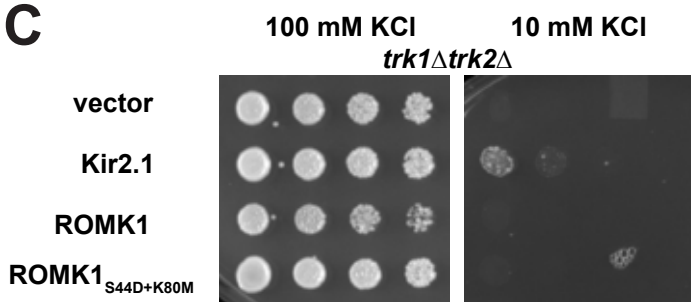**D**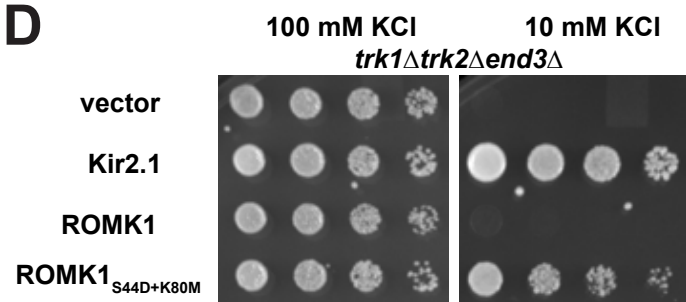

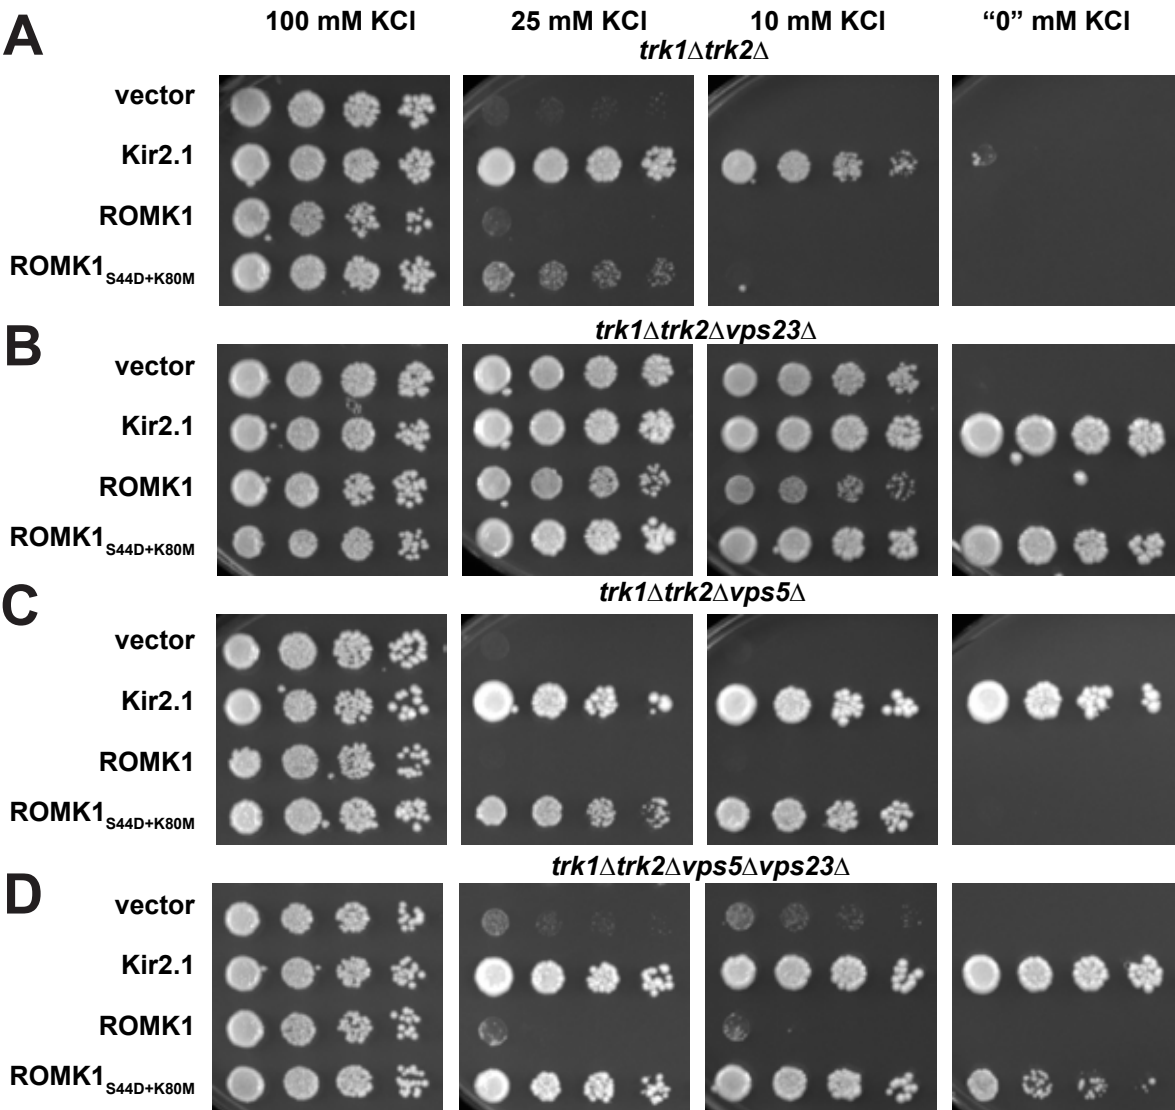



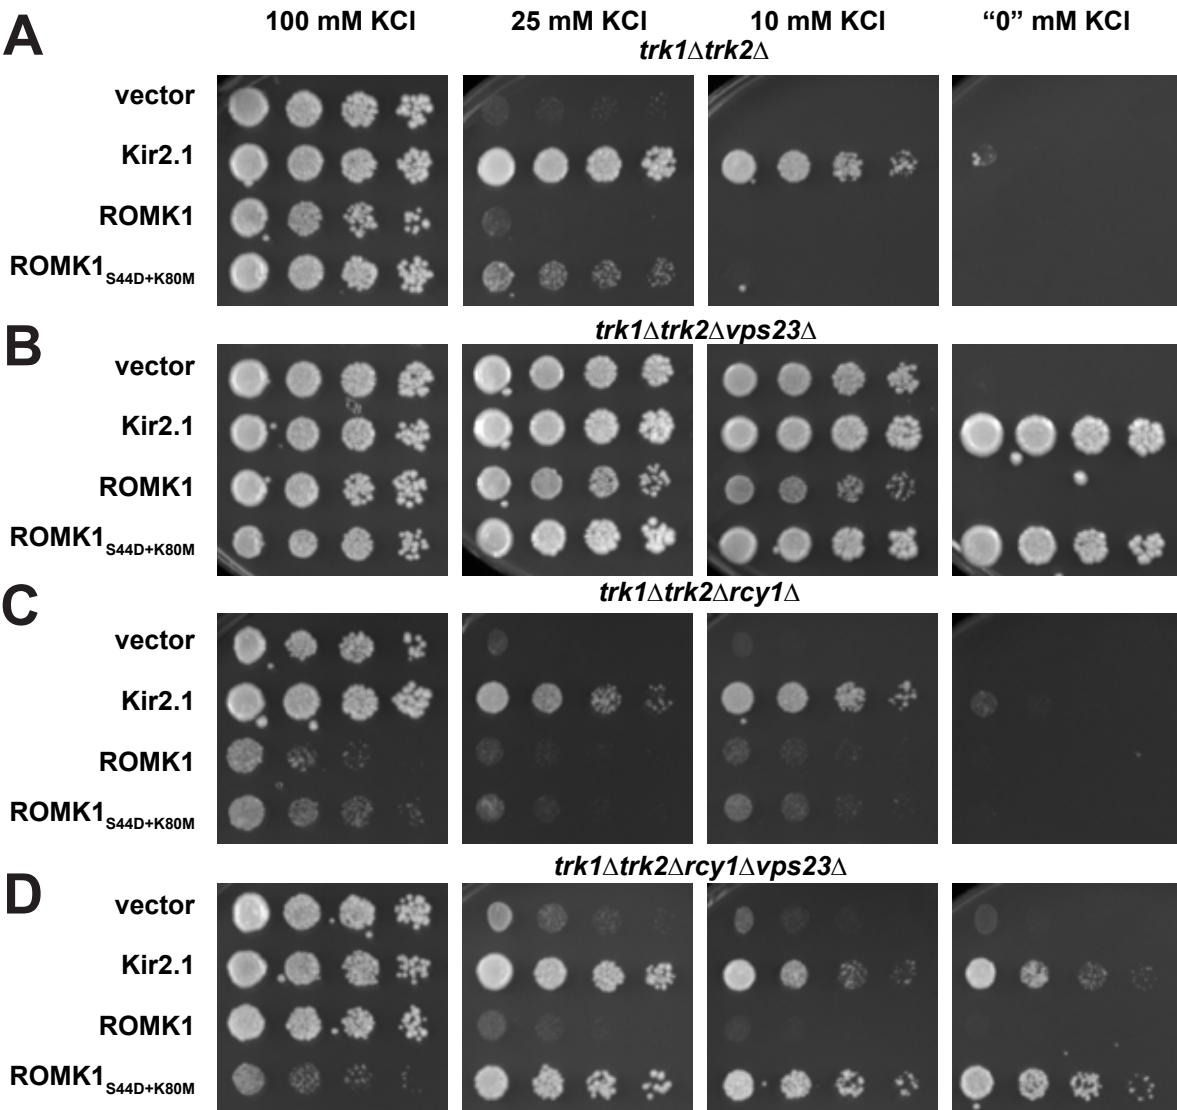

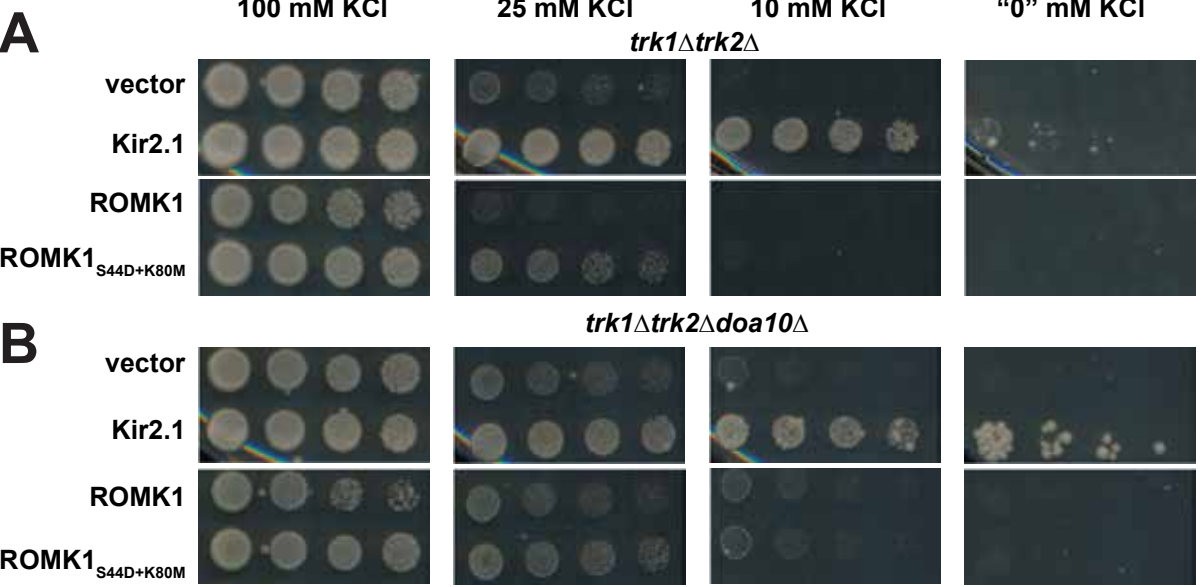

Supplementary Table S1: Full list of hits from SGA screen

| z-score | Systemic Name | Standard Name | Description                                                                                                                                                                                                                                                                                                                                                                                                                                         |
|---------|---------------|---------------|-----------------------------------------------------------------------------------------------------------------------------------------------------------------------------------------------------------------------------------------------------------------------------------------------------------------------------------------------------------------------------------------------------------------------------------------------------|
| 3       | YAL002W       | VPS8          | Membrane-binding component of the CORVET complex; involved in endosomal vesicle tethering and fusion in the endosome to vacuole protein targeting pathway; interacts with Vps21p; contains RING finger motif                                                                                                                                                                                                                                        |
| 3       | YAL011W       | SWC3          | Protein of unknown function; component of the SWR1 complex, which exchanges histone variant H2AZ (Htz1p) for chromatin-bound histone H2A; required for formation of nuclear-associated array of smooth endoplasmic reticulum known as karmellae                                                                                                                                                                                                     |
| 3       | YAL051W       | OAF1          | Oleate-activated transcription factor; subunit of a heterodimeric complex with Pip2p, which binds to oleate-response elements (ORE) in the promoter of genes involved in beta-oxidation of fatty acids, peroxisome organization and biogenesis, activating transcription in the presence of oleate; regulates chromatin silencing at telomeres; involved in diauxic shift; OAF1 has a paralogue, PIP2, that arose from the whole genome duplication |
| 3       | YAL053W       | FLC2          | Putative calcium channel involved in calcium release under hypotonic stress; required for uptake of FAD into endoplasmic reticulum; involved in cell wall maintenance; FLC2 has a paralogue, YOR365C, that arose from the whole genome duplication                                                                                                                                                                                                  |
| 3       | YAL068C       | PAU8          | Protein of unknown function; member of the seripauperin multigene family encoded mainly in subtelomeric regions                                                                                                                                                                                                                                                                                                                                     |
| 3       | YAR002C-A     | ERP1          | Member of the p24 family involved in ER to Golgi transport; role in misfolded protein quality control; forms heterotrimeric complex with Erp2p, Emp24p, and Erv25p; localized to COPII-coated vesicles; ERP1 has a paralogue, ERP6, that arose from the whole genome duplication                                                                                                                                                                    |
| 3       | YBL006C       | LDB7          | Component of the RSC chromatin remodeling complex; interacts with Rsc3p, Rsc30p, Npl6p, and Htl1p to form a module important for a broad range of RSC functions                                                                                                                                                                                                                                                                                     |
| 3       | YBL011W       | SCT1          | Glycerol 3-phosphate/dihydroxyacetone phosphate sn-1 acyltransferase; dual substrate-specific acyltransferase of the glycerolipid biosynthesis pathway; prefers 16-carbon fatty acids; similar to Gpt2p; gene is constitutively transcribed                                                                                                                                                                                                         |
| 3       | YBL049W       | MOH1          | Protein of unknown function, essential for stationary phase survival; not required for growth on nonfermentable carbon sources; possibly linked with vacuolar transport                                                                                                                                                                                                                                                                             |
| 3       | YBL057C       | PTH2          | One of two mitochondrially-localized peptidyl-tRNA hydrolases; negatively regulates the ubiquitin-proteasome pathway via interactions with ubiquitin-like ubiquitin-associated proteins; dispensable for cell growth; see also PTH1                                                                                                                                                                                                                 |
| 3       | YBL064C       | PRX1          | Mitochondrial peroxiredoxin with thioredoxin peroxidase activity; has a role in reduction of hydroperoxides; reactivation requires Trr2p and glutathione; induced during respiratory growth and oxidative stress; phosphorylated; protein abundance increases in response to DNA replication stress                                                                                                                                                 |
| 3       | YBL065W       |               | Dubious open reading frame; unlikely to encode a functional protein, based on available experimental and comparative                                                                                                                                                                                                                                                                                                                                |

|   |         |       |                                                                                                                                                                                                                                                                                                                                                                                                                                                                                          |
|---|---------|-------|------------------------------------------------------------------------------------------------------------------------------------------------------------------------------------------------------------------------------------------------------------------------------------------------------------------------------------------------------------------------------------------------------------------------------------------------------------------------------------------|
|   |         |       | sequence data; partially overlaps verified ORF SEF1/YBL066C; YBL065W is a non-essential gene                                                                                                                                                                                                                                                                                                                                                                                             |
| 3 | YBL078C | ATG8  | Component of autophagosomes and Cvt vesicles; regulator of Atg1p, targets it to autophagosomes; binds the Atg1p-Atg13p complex, triggering its vacuolar degradation; unique ubiquitin-like protein whose conjugation target is lipid phosphatidylethanolamine (PE); Atg8p-PE is anchored to membranes, is involved in phagophore expansion, and may mediate membrane fusion during autophagosome formation; deconjugation of Atg8p-PE is required for efficient autophagosome biogenesis |
| 3 | YBL091C | MAP2  | Methionine aminopeptidase; catalyzes the cotranslational removal of N-terminal methionine from nascent polypeptides; function is partially redundant with that of Map1p                                                                                                                                                                                                                                                                                                                  |
| 3 | YBL094C |       | Dubious open reading frame; unlikely to encode a functional protein, based on available experimental and comparative sequence data; partially overlaps uncharacterized ORF YBL095W                                                                                                                                                                                                                                                                                                       |
| 3 | YBR018C | GAL7  | Galactose-1-phosphate uridyl transferase; synthesizes glucose-1-phosphate and UDP-galactose from UDP-D-glucose and alpha-D-galactose-1-phosphate in the second step of galactose catabolism; human homolog UGP2 can complement yeast null mutant                                                                                                                                                                                                                                         |
| 3 | YBR019C | GAL10 | UDP-glucose-4-epimerase; catalyzes interconversion of UDP-galactose and UDP-D-glucose in galactose metabolism; also catalyzes conversion of alpha-D-glucose or alpha-D-galactose to their beta-anomers; human homolog GALE implicated in galactosemia, can complement yeast null mutant                                                                                                                                                                                                  |
| 3 | YBR020W | GAL1  | Galactokinase; phosphorylates alpha-D-galactose to alpha-D-galactose-1-phosphate in the first step of galactose catabolism; expression regulated by Gal4p; human homolog GALK2 complements yeast null mutant; GAL1 has a paralog, GAL3, that arose from the whole genome duplication                                                                                                                                                                                                     |
| 3 | YBR022W | POA1  | Phosphatase that is highly specific for ADP-ribose 1"-phosphate; a tRNA splicing metabolite; may have a role in regulation of tRNA splicing                                                                                                                                                                                                                                                                                                                                              |
| 3 | YBR024W | SCO2  | Protein anchored to mitochondrial inner membrane; may have a redundant function with Sco1p in delivery of copper to cytochrome c oxidase; interacts with Cox2p; SCO2 has a paralog, SCO1, that arose from the whole genome duplication                                                                                                                                                                                                                                                   |
| 3 | YBR025C | OLA1  | P-loop ATPase with similarity to human OLA1 and bacterial YchF; identified as specifically interacting with the proteasome; null mutant displays increased translation rate and increased readthrough of premature stop codons; protein abundance increases in response to hydrogen peroxide and to DNA replication stress                                                                                                                                                               |
| 3 | YBR026C | ETR1  | 2-enoyl thioester reductase; member of the medium chain dehydrogenase/reductase family; localized to mitochondria, where it has a probable role in fatty acid synthesis; human MECR functionally complements the respiratory growth defect of the null mutant                                                                                                                                                                                                                            |

|   |         |       |                                                                                                                                                                                                                                                                                                                                                                                                                                                            |
|---|---------|-------|------------------------------------------------------------------------------------------------------------------------------------------------------------------------------------------------------------------------------------------------------------------------------------------------------------------------------------------------------------------------------------------------------------------------------------------------------------|
| 3 | YBR033W | EDS1  | Putative zinc cluster protein, predicted to be a transcription factor; not an essential gene; EDS1 has a paralog, RGT1, that arose from the whole genome duplication                                                                                                                                                                                                                                                                                       |
| 3 | YBR041W | FAT1  | Very long chain fatty acyl-CoA synthetase and fatty acid transporter; activates imported fatty acids with a preference for very long lengths (C20-C26); has a separate function in the transport of long chain fatty acids                                                                                                                                                                                                                                 |
| 3 | YBR051W |       | Dubious open reading frame; unlikely to encode a functional protein, based on available experimental and comparative sequence data; partially overlaps the REG2/YBR050C regulatory subunit of the Glc7p type-1 protein phosphatase                                                                                                                                                                                                                         |
| 3 | YBR059C | AKL1  | Ser-Thr protein kinase; member (with Ark1p and Prk1p) of the Ark kinase family; involved in endocytosis and actin cytoskeleton organization                                                                                                                                                                                                                                                                                                                |
| 3 | YBR106W | PHO88 | Protein involved in SRP-independent targeting of substrates to the ER; component of an alternative ER targeting pathway that has partial functional redundancy with the GET pathway; preference for substrates with downstream transmembrane domains; interacts with Snd1p, Env10p/Snd2p, and Sec61p-translocon subunits; can compensate for loss of SRP; role in phosphate transport, interacting with pho88, and in the maturation of secretory proteins |
| 3 | YBR127C | VMA2  | Subunit B of V1 peripheral membrane domain of vacuolar H <sup>+</sup> -ATPase; electrogenic proton pump found throughout the endomembrane system; contains nucleotide binding sites; also detected in the cytoplasm; protein abundance increases in response to DNA replication stress; human homolog ATP6V1B1, implicated in autosomal-recessive distal renal tubular acidosis (RTA) with sensorineural deafness, complements yeast null mutant           |
| 3 | YBR128C | ATG14 | Autophagy-specific subunit of phosphatidylinositol 3-kinase complex I; Atg14p targets complex I to the phagophore assembly site (PAS); required for localizing additional ATG proteins to the PAS; required for overflow degradation of misfolded proteins when ERAD is saturated; homolog of human Barkor; other members are Vps34, Vps15, and Vps30p                                                                                                     |
| 3 | YBR130C | SHE3  | Protein adaptor between Myo4p and the She2p-mRNA complex; part of the mRNA localization machinery that restricts accumulation of certain proteins to the bud; also required for cortical ER inheritance                                                                                                                                                                                                                                                    |
| 3 | YBR132C | AGP2  | Plasma membrane regulator of polyamine and carnitine transport; has similarity to transporters but lacks transport activity; may act as a sensor that transduces environmental signals; has a positive or negative regulatory effect on transcription of many transporter genes                                                                                                                                                                            |
| 3 | YBR134W |       | Dubious open reading frame; unlikely to encode a functional protein, based on available experimental and comparative sequence data                                                                                                                                                                                                                                                                                                                         |
| 3 | YBR137W |       | Protein with a role in ER delivery of tail-anchored membrane proteins; interacts with Sgt2p; binds to the TRC complex, which                                                                                                                                                                                                                                                                                                                               |

|   |         |        |                                                                                                                                                                                                                                                                                                                                                                                                                                           |
|---|---------|--------|-------------------------------------------------------------------------------------------------------------------------------------------------------------------------------------------------------------------------------------------------------------------------------------------------------------------------------------------------------------------------------------------------------------------------------------------|
|   |         |        | inserts proteins into the ER membrane; interacts with Msn5p karyopherin; YBR137W is not an essential gene                                                                                                                                                                                                                                                                                                                                 |
| 3 | YBR150C | TBS1   | Protein of unknown function; the authentic, non-tagged protein is detected in highly purified mitochondria in high-throughput studies; TBS1 has a paralog, HAL9, that arose from the whole genome duplication                                                                                                                                                                                                                             |
| 3 | YBR151W | APD1   | Protein of unknown function; required for normal localization of actin patches and for normal tolerance of sodium ions and hydrogen peroxide; localizes to both cytoplasm and nucleus                                                                                                                                                                                                                                                     |
| 3 | YBR158W | AMN1   | Protein required for daughter cell separation; multiple mitotic checkpoints, and chromosome stability; contains 12 degenerate leucine-rich repeat motifs; expression is induced by the Mitotic Exit Network (MEN)                                                                                                                                                                                                                         |
| 3 | YBR161W | CSH1   | Mannosylinositol phosphorylceramide (MIPC) synthase catalytic subunit; forms a complex with regulatory subunit Csg2p; function in sphingolipid biosynthesis is overlapping with that of Sur1p; CSH1 has a paralog, SUR1, that arose from the whole genome duplication                                                                                                                                                                     |
| 3 | YBR169C | SSE2   | Member of Hsp110 subclass of the heat shock protein 70 (HSP70) family; serves as nucleotide exchange factor to load ATP onto the SSA class of cytosolic Hsp70s; may be involved in protein folding; localized to the cytoplasm; SSE2 has a paralog, SSE1, that arose from the whole genome duplication                                                                                                                                    |
| 3 | YBR175W | SWD3   | Essential subunit of the COMPASS (Set1C) complex; COMPASS methylates histone H3 on lysine 4 and is required in transcriptional silencing near telomeres; WD40 beta propeller superfamily member and ortholog of mammalian WDR5                                                                                                                                                                                                            |
| 3 | YBR176W | ECM31  | Ketopantoate hydroxymethyltransferase; required for pantothenic acid biosynthesis, converts 2-oxoisovalerate into 2-dehydropantoate                                                                                                                                                                                                                                                                                                       |
| 2 | YBR187W | GDT1   | Calcium transporter localized to the cis- and medial-Golgi apparatus; required for protein glycosylation; GFP-fusion protein localizes to the vacuole; TMEM165, a human gene which causes Congenital Disorders of Glycosylation is orthologous and functionally complements the null allele; expression pattern and physical interactions suggest a possible role in ribosome biogenesis; expression reduced in a <i>gcr1</i> null mutant |
| 2 | YBR189W | RPS9B  | Protein component of the small (40S) ribosomal subunit; homologous to mammalian ribosomal protein S9 and bacterial S4; RPS9B has a paralog, RPS9A, that arose from the whole genome duplication                                                                                                                                                                                                                                           |
| 2 | YBR191W | RPL21A | Ribosomal 60S subunit protein L21A; homologous to mammalian ribosomal protein L21, no bacterial homolog; RPL21A has a paralog, RPL21B, that arose from the whole genome duplication                                                                                                                                                                                                                                                       |
| 2 | YBR197C |        | Protein of unknown function; green fluorescent protein (GFP)-fusion protein localizes to the cytoplasm and nucleus; YBR197C is not an essential gene; relative distribution to the nucleus increases upon DNA replication stress; YBR197C has a paralog, YPL077C, that arose from the whole genome duplication                                                                                                                            |

|   |         |        |                                                                                                                                                                                                                                                                                                                                                                                           |
|---|---------|--------|-------------------------------------------------------------------------------------------------------------------------------------------------------------------------------------------------------------------------------------------------------------------------------------------------------------------------------------------------------------------------------------------|
| 2 | YBR200W | BEM1   | Protein containing SH3-domains; involved in establishing cell polarity and morphogenesis; functions as a scaffold protein for complexes that include Cdc24p, Ste5p, Ste20p, and Rsr1p                                                                                                                                                                                                     |
| 2 | YBR206W |        | Dubious open reading frame; unlikely to encode a functional protein, based on available experimental and comparative sequence data; partially overlaps the verified gene KTR3                                                                                                                                                                                                             |
| 2 | YBR207W | FTH1   | Putative high affinity iron transporter; involved in transport of intravacuolar stores of iron; forms complex with Fet5p; expression is regulated by iron; proposed to play indirect role in endocytosis; protein abundance increases in response to DNA replication stress                                                                                                               |
| 2 | YBR208C | DUR1,2 | Urea amidolyase; contains both urea carboxylase and allophanate hydrolase activities, degrades urea to CO <sub>2</sub> and NH <sub>3</sub> ; expression sensitive to nitrogen catabolite repression and induced by allophanate, an intermediate in allantoin degradation; protein abundance increases in response to DNA replication stress                                               |
| 2 | YBR220C |        | Putative protein of unknown function; YBR220C is not an essential gene                                                                                                                                                                                                                                                                                                                    |
| 2 | YBR221C | PDB1   | E1 beta subunit of the pyruvate dehydrogenase (PDH) complex; PDH is an evolutionarily conserved multi-protein complex found in mitochondria                                                                                                                                                                                                                                               |
| 2 | YBR224W |        | Dubious open reading frame; unlikely to encode a functional protein, based on available experimental and comparative sequence data; partially overlaps the verified gene TDP1                                                                                                                                                                                                             |
| 2 | YBR225W |        | Putative protein of unknown function; non-essential gene identified in a screen for mutants affected in mannosylphosphorylation of cell wall components                                                                                                                                                                                                                                   |
| 2 | YBR231C | SWC5   | Component of the SWR1 complex; complex exchanges histone variant H2AZ (Htz1p) for chromatin-bound histone H2A; protein abundance increases in response to DNA replication stress; relocalizes to the cytosol in response to hypoxia                                                                                                                                                       |
| 2 | YBR248C | HIS7   | Imidazole glycerol phosphate synthase; glutamine amidotransferase:cyclase that catalyzes the fifth step of histidine biosynthesis and also produces 5-aminoimidazole-4-carboxamide ribotide (AICAR), a purine precursor                                                                                                                                                                   |
| 2 | YBR249C | ARO4   | 3-deoxy-D-arabino-heptulosonate-7-phosphate (DAHP) synthase; catalyzes the first step in aromatic amino acid biosynthesis and is feedback-inhibited by tyrosine or high concentrations of phenylalanine or tryptophan; relative distribution to the nucleus increases upon DNA replication stress                                                                                         |
| 2 | YBR262C | MIC12  | Component of the MICOS complex; MICOS (formerly MINOS or MitOS) is a mitochondrial inner membrane complex that extends into the intermembrane space and has a role in the maintenance of crista junctions, inner membrane architecture, and formation of contact sites to the outer membrane; forms a subcomplex with Mic10p and Mic27p whose assembly and stability requires cardiolipin |
| 2 | YBR264C | YPT10  | Rab family GTP-binding protein; contains the PEST signal sequence specific for proteolytic enzymes; may be involved in vesicular transport; overexpression leads to accumulation of Golgi-like cisternae with budding vesicles                                                                                                                                                            |

|   |           |       |                                                                                                                                                                                                                                                                                                                                                                                                                                                                        |
|---|-----------|-------|------------------------------------------------------------------------------------------------------------------------------------------------------------------------------------------------------------------------------------------------------------------------------------------------------------------------------------------------------------------------------------------------------------------------------------------------------------------------|
| 2 | YBR266C   | SLM6  | Protein with a potential role in actin cytoskeleton organization; gene exhibits synthetic genetic interaction with MSS4 encoding phosphatidylinositol 4-phosphate kinase                                                                                                                                                                                                                                                                                               |
| 2 | YBR267W   | REI1  | Cytoplasmic pre-60S factor; required for the correct recycling of shuttling factors Alb1, Arx1 and Tif6 at the end of the ribosomal large subunit biogenesis; involved in bud growth in the mitotic signaling network                                                                                                                                                                                                                                                  |
| 2 | YBR269C   | SDH8  | Protein required for assembly of succinate dehydrogenase; interacts with flavinylated Sdh1p and may function as a chaperone for free Sdh1p, protecting its FAD cofactor from redox reactions before assembly of the complex; soluble protein of the mitochondrial matrix; respiratory defect of null mutant is functionally complemented by <i>Drosophila</i> and human orthologs                                                                                      |
| 2 | YBR272C   | HSM3  | Evolutionarily conserved 19S regulatory particle assembly-chaperone; involved in the assembly of the base subcomplex of the 19S proteasomal regulatory particle (RP); involved in DNA mismatch repair during slow growth; weak similarity to Msh1p; structural study suggests Hsm3p is a scaffold protein for Rpt1p-Rpt2p complex formation; ortholog of human 19S subunit S5b                                                                                         |
| 2 | YBR276C   | PPS1  | Protein phosphatase; has specificity for serine, threonine, and tyrosine residues; has a role in the DNA synthesis phase of the cell cycle                                                                                                                                                                                                                                                                                                                             |
| 2 | YBR286W   | APE3  | Vacuolar aminopeptidase Y; processed to mature form by Prb1p                                                                                                                                                                                                                                                                                                                                                                                                           |
| 2 | YBR287W   |       | Protein of unknown function; green fluorescent protein (GFP)-fusion protein localizes to the ER; YBR287W is not an essential gene                                                                                                                                                                                                                                                                                                                                      |
| 2 | YBR291C   | CTP1  | Mitochondrial inner membrane citrate transporter; member of the mitochondrial carrier family                                                                                                                                                                                                                                                                                                                                                                           |
| 2 | YCL001W-A |       | Putative protein of unknown function; YCL001W-A gene has similarity to DOM34 and is present in a region duplicated between chromosomes XIV and III                                                                                                                                                                                                                                                                                                                     |
| 2 | YCL005W   | LDB16 | Protein involved in lipid droplet (LD) assembly; forms a complex with Sei1p at ER-LD contact sites, stabilizing contact sites; ensures that LDs bud from the ER towards the cytosolic side of the membrane; null mutants have decreased net negative cell surface charge and localized accumulation of phosphatidic acid (PA) marker proteins; GFP-fusion protein expression is induced in response to MMS; null mutant can be complemented by the human seipin, BSCL2 |
| 2 | YCL008C   | STP22 | Component of the ESCRT-I complex; ESCRT-I is involved in ubiquitin-dependent sorting of proteins into the endosome; prevents polyubiquitination of the arrestin-related protein Rim8p, thereby directing its monoubiquitination by Rsp5p; homologous to the mouse and human Tsg101 tumor susceptibility gene; mutants exhibit a Class E Vps phenotype;                                                                                                                 |
| 2 | YCL026C   |       | Deleted ORF; does not encode a protein; included in the original annotation of Chromosome III but later deleted due to sequence corrections                                                                                                                                                                                                                                                                                                                            |
| 2 | YCL030C   | HIS4  | Multifunctional enzyme containing phosphoribosyl-ATP pyrophosphatase; phosphoribosyl-AMP cyclohydrolase, and                                                                                                                                                                                                                                                                                                                                                           |



|   |           |       |                                                                                                                                                                                                                                                                                                                                                                                                                                                                                                  |
|---|-----------|-------|--------------------------------------------------------------------------------------------------------------------------------------------------------------------------------------------------------------------------------------------------------------------------------------------------------------------------------------------------------------------------------------------------------------------------------------------------------------------------------------------------|
|   |           |       | histidinol dehydrogenase activities; catalyzes the second, third, ninth and tenth steps in histidine biosynthesis                                                                                                                                                                                                                                                                                                                                                                                |
| 2 | YCL040W   | GLK1  | Glucokinase; catalyzes the phosphorylation of glucose at C6 in the first irreversible step of glucose metabolism; one of three glucose phosphorylating enzymes; expression regulated by non-fermentable carbon sources; GLK1 has a paralog, EMI2, that arose from the whole genome duplication                                                                                                                                                                                                   |
| 2 | YCL061C   | MRC1  | S-phase checkpoint protein required for DNA replication; couples DNA helicase and polymerase; interacts with and stabilizes Pol2p at stalled replication forks during stress, where it forms a pausing complex with Tof1p and is phosphorylated by Mec1p; defines a novel S-phase checkpoint with Hog1p that coordinates DNA replication and transcription upon osmotic stress; protects uncapped telomeres; Dia2p-dependent degradation mediates checkpoint recovery; mammalian caspase homolog |
| 2 | YCR002C   | CDC10 | Component of the septin ring, required for cytokinesis; septins are GTP-binding proteins that assemble into rod-like hetero-oligomers that can associate to form filaments; septin rings at the mother-bud neck act as scaffolds for recruiting cell division factors and as barriers to prevent diffusion of specific proteins between mother and daughter cells; N-terminus interacts with phosphatidylinositol-4,5-bisphosphate; protein abundance increases under DNA damage stress          |
| 2 | YCR007C   |       | Putative integral membrane protein; member of DUP240 gene family; SWAT-GFP and mCherry fusion proteins localize to the cell periphery and vacuole; YCR007C is not an essential gene                                                                                                                                                                                                                                                                                                              |
| 2 | YCR020W-B | HTL1  | Component of the RSC chromatin remodeling complex; RSC functions in transcriptional regulation and elongation, chromosome stability, and establishing sister chromatid cohesion; involved in telomere maintenance                                                                                                                                                                                                                                                                                |
| 2 | YCR026C   | NPP1  | Nucleotide pyrophosphatase/phosphodiesterase; mediates extracellular nucleotide phosphate hydrolysis along with Npp2p and Pho5p; activity and expression enhanced during conditions of phosphate starvation; involved in spore wall assembly; NPP1 has a paralog, NPP2, that arose from the whole genome duplication, and an npp1 npp2 double mutant exhibits reduced dityrosine fluorescence relative to the single mutants                                                                     |
| 2 | YCR032W   | BPH1  | Protein homologous to Chediak-Higashi syndrome and Beige proteins; both of which are implicated in disease syndromes in human and mouse, respectively, due to defective lysosomal trafficking; mutant phenotype and genetic interactions suggest a role in protein sorting                                                                                                                                                                                                                       |
| 2 | YCR036W   | RBK1  | Putative ribokinase                                                                                                                                                                                                                                                                                                                                                                                                                                                                              |
| 2 | YCR043C   |       | Putative protein of unknown function; green fluorescent protein (GFP)-fusion protein localizes to the Golgi apparatus; YCR043C is not an essential gene                                                                                                                                                                                                                                                                                                                                          |
| 2 | YCR045C   | RRT12 | Probable subtilisin-family protease; role in formation of the dityrosine layer of spore walls; localizes to the spore wall and also the nuclear envelope and ER region in mature spores                                                                                                                                                                                                                                                                                                          |

|   |         |      |                                                                                                                                                                                                                                                                                                                                                                                                                                                                                              |
|---|---------|------|----------------------------------------------------------------------------------------------------------------------------------------------------------------------------------------------------------------------------------------------------------------------------------------------------------------------------------------------------------------------------------------------------------------------------------------------------------------------------------------------|
| 2 | YCR053W | THR4 | Threonine synthase; conserved protein that catalyzes formation of threonine from O-phosphohomoserine; expression is regulated by the GCN4-mediated general amino acid control pathway                                                                                                                                                                                                                                                                                                        |
| 2 | YCR069W | CPR4 | Peptidyl-prolyl cis-trans isomerase (cyclophilin); catalyzes the cis-trans isomerization of peptide bonds N-terminal to proline residues; has a potential role in the secretory pathway; CPR4 has a paralog, CPR8, that arose from the whole genome duplication                                                                                                                                                                                                                              |
| 2 | YCR084C | TUP1 | General repressor of transcription; forms complex with Cyc8p, involved in the establishment of repressive chromatin structure through interactions with histones H3 and H4, appears to enhance expression of some genes                                                                                                                                                                                                                                                                      |
| 2 | YCR087W |      | Dubious open reading frame; unlikely to encode a functional protein, based on available experimental and comparative sequence data; partially overlaps uncharacterized gene YCR087C-A; YCR087W is not an essential gene                                                                                                                                                                                                                                                                      |
| 2 | YCR089W | FIG2 | Cell wall adhesin, expressed specifically during mating; may be involved in maintenance of cell wall integrity during mating; FIG2 has a paralog, AGA1, that arose from the whole genome duplication                                                                                                                                                                                                                                                                                         |
| 2 | YDL010W | GRX6 | Cis-golgi localized monothiol glutaredoxin, binds Fe-S cluster; more similar in activity to dithiol than other monothiol glutaredoxins; involved in the oxidative stress response; GRX6 has a paralog, GRX7, that arose from the whole genome duplication                                                                                                                                                                                                                                    |
| 2 | YDL013W | SLX5 | Subunit of the Slx5-Slx8 SUMO-targeted Ub ligase (STUBL) complex; role in Ub-mediated degradation of histone variant Cse4p preventing mislocalization to euchromatin; role in proteolysis of spindle positioning protein Kar9p, and DNA repair proteins Rad52p and Rad57p; forms SUMO-dependent nuclear foci, including DNA repair centers; contains a RING domain and two SIM motifs; associates with the centromere; required for maintenance of genome integrity like human ortholog RNF4 |
| 2 | YDL021W | GPM2 | Homolog of Gpm1p phosphoglycerate mutase; converts 3-phosphoglycerate to 2-phosphoglycerate in glycolysis; may be non-functional; GPM2 has a paralog, GPM3, that arose from the whole genome duplication                                                                                                                                                                                                                                                                                     |
| 2 | YDL048C | STP4 | Protein containing a Kruppel-type zinc-finger domain; similar to Stp1p, Stp2p; predicted transcription factor; relative distribution to the nucleus increases upon DNA replication stress; STP4 has a paralog, STP3, that arose from the whole genome duplication                                                                                                                                                                                                                            |
| 2 | YDL069C | CBS1 | Mitochondrial translational activator of the COB mRNA; membrane protein that interacts with translating ribosomes, acts on the COB mRNA 5'-untranslated leader                                                                                                                                                                                                                                                                                                                               |
| 2 | YDL070W | BDF2 | Protein involved in transcription initiation; acts at TATA-containing promoters; associates with the basal transcription factor TFIIID; contains two bromodomains; corresponds to the C-terminal region of mammalian TAF1; redundant with Bdf1p; protein abundance increases in response to DNA replication stress; BDF2 has a paralog, BDF1, that arose from the whole genome duplication                                                                                                   |

|   |           |        |                                                                                                                                                                                                                                                                                                                                                                                                                                                                                                 |
|---|-----------|--------|-------------------------------------------------------------------------------------------------------------------------------------------------------------------------------------------------------------------------------------------------------------------------------------------------------------------------------------------------------------------------------------------------------------------------------------------------------------------------------------------------|
| 2 | YDL101C   | DUN1   | Cell-cycle checkpoint S/T protein kinase; required for transient G2/M arrest after DNA damage, damage-induced transcription, and nuclear-to-cytoplasmic redistribution of Rnr2p-Rnr4p after genotoxic stress and iron deprivation; phosphorylates repair protein Rad55p, transcriptional repressor Sml1p, superoxide dismutase, and ribonucleotide reductase inhibitors Crt1p and Dif1p; functions in the Mec1p pathway to regulate dNTP pools and telomere length; postreplicative repair role |
| 2 | YDL121C   |        | Putative protein of unknown function; green fluorescent protein (GFP)-fusion protein localizes to the endoplasmic reticulum; YDL121C is not an essential protein                                                                                                                                                                                                                                                                                                                                |
| 2 | YDL130W-A | STF1   | Protein involved in regulation of the mitochondrial F1F0-ATP synthase; Stf1p and Stf2p act as stabilizing factors that enhance inhibitory action of the Inh1p protein; protein abundance increases in response to DNA replication stress; STF1 has a paralog, INH1, that arose from the whole genome duplication                                                                                                                                                                                |
| 2 | YDL131W   | LYS21  | Homocitrate synthase isozyme; catalyzes the condensation of acetyl-CoA and alpha-ketoglutarate to form homocitrate, which is the first step in the lysine biosynthesis pathway; LYS21 has a paralog, LYS20, that arose from the whole genome duplication                                                                                                                                                                                                                                        |
| 2 | YDL133C-A | RPL41B | Ribosomal 60S subunit protein L41B; comprises only 25 amino acids; rpl41a rpl41b double null mutant is viable; homologous to mammalian ribosomal protein L41, no bacterial homolog; RPL41B has a paralog, RPL41A, that arose from the whole genome duplication                                                                                                                                                                                                                                  |
| 2 | YDL151C   | BUD30  | Dubious open reading frame; unlikely to encode a functional protein, based on available experimental and comparative sequence data; not conserved in closely related Saccharomyces species; 96% of ORF overlaps the verified gene RPC53; diploid mutant displays a weak budding pattern phenotype in a systematic assay                                                                                                                                                                         |
| 2 | YDL157C   |        | Putative protein of unknown function; the authentic, non-tagged protein is detected in highly purified mitochondria in high-throughput studies                                                                                                                                                                                                                                                                                                                                                  |
| 2 | YDL161W   | ENT1   | Epsin-like protein involved in endocytosis and actin patch assembly; functionally redundant with Ent2p; binds clathrin via a clathrin-binding domain motif at C-terminus; relocates from bud neck to cytoplasm upon DNA replication stress; ENT1 has a paralog, ENT2, that arose from the whole genome duplication                                                                                                                                                                              |
| 2 | YDL182W   | LYS20  | Homocitrate synthase isozyme and functions in DNA repair; catalyzes the condensation of acetyl-CoA and alpha-ketoglutarate to form homocitrate, which is the first step in the lysine biosynthesis pathway; LYS20 has a paralog, LYS21, that arose from the whole genome duplication                                                                                                                                                                                                            |
| 2 | YDL233W   | MFG1   | Regulator of filamentous growth; interacts with FLO11 promoter and regulates FLO11 expression; binds to transcription factors Flo8p and Mss11p; green fluorescent protein (GFP)-fusion protein localizes to the nucleus; YDL233W is not an essential gene                                                                                                                                                                                                                                       |
| 2 | YDR004W   | RAD57  | Protein that stimulates strand exchange; stimulates strand exchange by stabilizing the binding of Rad51p to single-stranded                                                                                                                                                                                                                                                                                                                                                                     |

|   |         |       |                                                                                                                                                                                                                                                                                                                                                                                   |
|---|---------|-------|-----------------------------------------------------------------------------------------------------------------------------------------------------------------------------------------------------------------------------------------------------------------------------------------------------------------------------------------------------------------------------------|
|   |         |       | DNA; involved in the recombinational repair of double-strand breaks in DNA during vegetative growth and meiosis; forms heterodimer with Rad55p                                                                                                                                                                                                                                    |
| 2 | YDR006C | SOK1  | Protein of unknown function; overexpression suppresses the growth defect of mutants lacking protein kinase A activity; involved in cAMP-mediated signaling; localized to the nucleus; similar to the mouse testis-specific protein PBS13                                                                                                                                          |
| 2 | YDR028C | REG1  | Regulatory subunit of type 1 protein phosphatase Glc7p; involved in negative regulation of glucose-repressible genes; involved in regulation of the nucleocytoplasmic shuttling of Hxk2p; REG1 has a paralog, REG2, that arose from the whole genome duplication                                                                                                                  |
| 2 | YDR029W |       | Putative protein of unknown function; conserved among <i>S. cerevisiae</i> strains; YDR029W is not an essential gene                                                                                                                                                                                                                                                              |
| 2 | YDR030C | RAD28 | Protein involved in DNA repair; related to the human CSA protein that is involved in transcription-coupled repair nucleotide excision repair                                                                                                                                                                                                                                      |
| 2 | YDR046C | BAP3  | Amino acid permease; involved in uptake of cysteine, leucine, isoleucine and valine; BAP3 has a paralog, BAP2, that arose from the whole genome duplication                                                                                                                                                                                                                       |
| 2 | YDR059C | UBC5  | Ubiquitin-conjugating enzyme; mediates selective degradation of short-lived, abnormal, or excess proteins, including histone H3; central component of the cellular stress response; expression is heat inducible; protein abundance increases in response to DNA replication stress; UBC5 has a paralog, UBC4, that arose from the whole genome duplication                       |
| 2 | YDR061W |       | Protein with similarity to ABC transporter family members; lacks predicted membrane-spanning regions; transcriptionally activated by Yrm1p along with genes involved in multidrug resistance                                                                                                                                                                                      |
| 2 | YDR063W | AIM7  | Protein that interacts with Arp2/3 complex; interacts with Arp2/3 complex to stimulate actin filament debranching and inhibit actin nucleation; has similarity to Cof1p and also to human glia maturation factor (GMF); null mutant displays elevated mitochondrial genome loss                                                                                                   |
| 2 | YDR067C | OCA6  | Cytoplasmic protein required for replication of Brome mosaic virus; <i>S. cerevisiae</i> is a model system for studying positive-strand RNA virus replication; null mutation confers sensitivity to tunicamycin and DTT                                                                                                                                                           |
| 2 | YDR069C | DOA4  | Ubiquitin hydrolase; deubiquitinates intraluminal vesicle (ILVs) cargo proteins; required for recycling ubiquitin from proteasome-bound ubiquitinated intermediates, acts at the late endosome/prevacuolar compartment to recover ubiquitin from ubiquitinated membrane proteins destined for the vacuole; DOA4 has a paralog, UBP5, that arose from the whole genome duplication |
| 2 | YDR071C | PAA1  | Polyamine acetyltransferase; acetylates polyamines (e.g. putrescine, spermidine, spermine) and also aralkylamines (e.g. tryptamine, phenylethylamine); may be involved in transcription and/or DNA replication                                                                                                                                                                    |

|   |         |       |                                                                                                                                                                                                                                                                                                                                                                                                                                                                                              |
|---|---------|-------|----------------------------------------------------------------------------------------------------------------------------------------------------------------------------------------------------------------------------------------------------------------------------------------------------------------------------------------------------------------------------------------------------------------------------------------------------------------------------------------------|
| 2 | YDR084C | TVP23 | Integral membrane protein; localized to late Golgi vesicles along with the v-SNARE Tlg2p; green fluorescent protein (GFP)-fusion protein localizes to the cytoplasm in a punctate pattern                                                                                                                                                                                                                                                                                                    |
| 2 | YDR100W | TVP15 | Integral membrane protein; localized to late Golgi vesicles along with the v-SNARE Tlg2p                                                                                                                                                                                                                                                                                                                                                                                                     |
| 2 | YDR101C | ARX1  | Nuclear export factor for the ribosomal pre-60S subunit; shuttling factor which directly binds FG rich nucleoporins and facilitates translocation through the nuclear pore complex; interacts directly with Alb1p; responsible for Tif6p recycling defects in the absence of Rei1; associated with the ribosomal export complex                                                                                                                                                              |
| 2 | YDR112W | IRC2  | Dubious open reading frame; unlikely to encode a functional protein, based on available experimental and comparative sequence data; partially overlaps ALT2/YDR111C; null mutant displays increased levels of spontaneous Rad52p foci                                                                                                                                                                                                                                                        |
| 2 | YDR114C |       | Putative protein of unknown function; deletion mutant exhibits poor growth at elevated pH and calcium                                                                                                                                                                                                                                                                                                                                                                                        |
| 2 | YDR117C | TMA64 | Protein of unknown function that associates with ribosomes; has a putative RNA binding domain; in mammals the corresponding protein, eIF2D, has been shown to possess translation initiation factor activity                                                                                                                                                                                                                                                                                 |
| 2 | YDR120C | TRM1  | tRNA methyltransferase; two forms of protein are made by alternative translation starts; localizes to both nucleus and mitochondrion to produce modified base N <sup>2</sup> ,N <sup>2</sup> -dimethylguanosine in tRNAs in both compartments; nuclear Trm1p is evenly distributed around inner nuclear membrane in WT, but mislocalizes as puncta near ER-nucleus junctions in spindle pole body (SPB) mutants; both Trm1p inner nuclear membrane targeting and maintenance depend upon SPB |
| 2 | YDR123C | INO2  | Transcription factor; component of the heteromeric Ino2p/Ino4p basic helix-loop-helix transcription activator that binds inositol/choline-responsive elements (ICREs), required for derepression of phospholipid biosynthetic genes in response to inositol depletion; involved in diauxic shift                                                                                                                                                                                             |
| 2 | YDR129C | SAC6  | Fimbrin, actin-bundling protein; cooperates with Scp1p in organization and maintenance of the actin cytoskeleton; phosphorylated by Cdc28p/Clb2p in metaphase on T103, to regulate conformation, and modulate actin filament binding affinity and actin cable dynamics; relocates from the plasma membrane to the cytoplasm upon DNA replication stress; human homologs PLS3 and LCP1 implicated in spinocerebellar ataxia type 2 (SCA2) can each complement yeast null mutant               |
| 2 | YDR130C | FIN1  | Spindle pole body-related intermediate filament protein; forms cell cycle-specific filaments between spindle pole bodies in dividing cells; localizes to poles and microtubules of spindle during anaphase and contributes to spindle stability; involved in Glc7p localization and regulation; relative distribution to the nucleus increases upon DNA replication stress                                                                                                                   |
| 2 | YDR136C | VPS61 | Dubious open reading frame; unlikely to encode a functional protein, based on available experimental and comparative sequence data; not conserved in closely related Saccharomyces                                                                                                                                                                                                                                                                                                           |

|   |         |       |                                                                                                                                                                                                                                                                                                                                                                                                                                                                                       |
|---|---------|-------|---------------------------------------------------------------------------------------------------------------------------------------------------------------------------------------------------------------------------------------------------------------------------------------------------------------------------------------------------------------------------------------------------------------------------------------------------------------------------------------|
|   |         |       | species; 4% of ORF overlaps the verified gene RGP1; deletion causes a vacuolar protein sorting defect                                                                                                                                                                                                                                                                                                                                                                                 |
| 2 | YDR138W | HPR1  | Subunit of THO/TREX complexes; this complex couple transcription elongation with mitotic recombination and with mRNA metabolism and export, subunit of an RNA Pol II complex; regulates lifespan; involved in telomere maintenance; similar to Top1p                                                                                                                                                                                                                                  |
| 2 | YDR140W | MTQ2  | S-adenosylmethionine-dependent methyltransferase; subunit of complex with Trm112p that methylates translation release factor Sup45p (eRF1) in the ternary complex eRF1-eRF3-GTP; similar to E.coli PrmC; member of the seven beta-strand family                                                                                                                                                                                                                                       |
| 2 | YDR143C | SAN1  | Ubiquitin-protein ligase; involved in proteasome-dependent degradation of aberrant nuclear proteins; targets substrates with regions of exposed hydrophobicity containing 5 or more contiguous hydrophobic residues; contains intrinsically disordered regions that contribute to substrate recognition; prefers a window of exposed hydrophobicity that causes a particular level of protein insolubility, suggesting that San1p evolved to target highly aggregation-prone proteins |
| 2 | YDR195W | REF2  | RNA-binding protein; involved in the cleavage step of mRNA 3'-end formation prior to polyadenylation, and in snoRNA maturation; part of holo-CPF subcomplex APT, which associates with 3'-ends of snoRNA- and mRNA-encoding genes; putative regulatory subunit of type 1 protein phosphatase Glc7p, required for actomyosin ring formation, and for timely dephosphorylation and release of Bnr1p from the division site; relocalizes to the cytosol in response to hypoxia           |
| 2 | YDR199W |       | Dubious open reading frame; unlikely to encode a functional protein, based on available experimental and comparative sequence data; partially overlaps the verified gene VPS64/YDR200C; computationally predicted to have thiol-disulfide oxidoreductase activity                                                                                                                                                                                                                     |
| 2 | YDR200C | VPS64 | Protein required for cytoplasm to vacuole targeting of proteins; forms a complex with Far3p and Far7p to Far11p involved in recovery from pheromone-induced cell cycle arrest; mutant has increased aneuploidy tolerance; VPS64 has a paralog, FAR10, that arose from the whole genome duplication                                                                                                                                                                                    |
| 2 | YDR204W | COQ4  | Protein with a role in ubiquinone (Coenzyme Q) biosynthesis; possibly functioning in stabilization of Coq7p; located on matrix face of mitochondrial inner membrane; component of a mitochondrial ubiquinone-synthesizing complex; human homolog COQ4 can complement yeast coq4 null mutant                                                                                                                                                                                           |
| 2 | YDR207C | UME6  | Rpd3L histone deacetylase complex subunit; key transcriptional regulator of early meiotic genes; involved in chromatin remodeling and transcriptional repression via DNA looping; binds URS1 upstream regulatory sequence, represses transcription by recruiting conserved histone deacetylase Rpd3p (through co-repressor Sin3p) and chromatin-remodeling factor Isw2p; couples metabolic responses to nutritional cues with initiation and progression of meiosis, forms compl      |

|   |         |       |                                                                                                                                                                                                                                                                                                                                                                                                                                                                |
|---|---------|-------|----------------------------------------------------------------------------------------------------------------------------------------------------------------------------------------------------------------------------------------------------------------------------------------------------------------------------------------------------------------------------------------------------------------------------------------------------------------|
| 2 | YDR218C | SPR28 | Sporulation-specific homolog of the CDC3/10/11/12 family of genes; meiotic septin expressed at high levels during meiotic divisions and ascospore formation; the yeast CDC3/10/11/12 family is a family of bud neck microfilament genes                                                                                                                                                                                                                        |
| 2 | YDR220C |       | Dubious open reading frame; unlikely to encode a functional protein, based on available experimental and comparative sequence data; null mutant exhibits synthetic phenotype with alpha-synuclein                                                                                                                                                                                                                                                              |
| 2 | YDR226W | ADK1  | Adenylate kinase, required for purine metabolism; localized to the cytoplasm and the mitochondria; lacks cleavable signal sequence; protein abundance increases in response to DNA replication stress; mutations affecting Adk1p catalytic activity deregulate expression of phosphate utilization genes PHO5 and PHO84; human homolog AK1 can complement yeast <i>adk1</i> mutant                                                                             |
| 2 | YDR231C | COX20 | Mitochondrial inner membrane protein; required for proteolytic processing of Cox2p and its assembly into cytochrome c oxidase                                                                                                                                                                                                                                                                                                                                  |
| 2 | YDR233C | RTN1  | Reticulon protein; involved in nuclear pore assembly and maintenance of tubular ER morphology; promotes membrane curvature; regulates the ER asymmetry-induced inheritance block during ER stress; role in ER-derived peroxisomal biogenesis; increases tubular ER when overexpressed; mutants have reduced phosphatidylserine transfer between the ER and mitochondria; interacts with exocyst subunit Sec6p, Yip3p, and Sbh1p; member of the RTNLA subfamily |
| 2 | YDR237W | MRPL7 | Mitochondrial ribosomal protein of the large subunit; MRPL7 produces both YmL5 and YmL7, which are two different modified forms of the same protein                                                                                                                                                                                                                                                                                                            |
| 2 | YDR252W | BTT1  | Heterotrimeric nascent polypeptide-associated complex beta3 subunit; complex binds ribosomes via its beta-subunits in close proximity to nascent polypeptides; interacts with Caf130p of the CCR4-NOT complex; similar to human BTF3; BTT1 has a paralog, EGD1, that arose from the whole genome duplication                                                                                                                                                   |
| 2 | YDR261C | EXG2  | Exo-1,3-beta-glucanase; involved in cell wall beta-glucan assembly; may be anchored to the plasma membrane via a glycosylphosphatidylinositol (GPI) anchor                                                                                                                                                                                                                                                                                                     |
| 2 | YDR270W | CCC2  | Cu(+2)-transporting P-type ATPase; required for export of copper from the cytosol into an extracytosolic compartment; similar to human proteins involved in Menkes and Wilsons diseases; protein abundance increases in response to DNA replication stress; affects TBSV model (+)RNA virus replication by regulating copper metabolism; human homologs ATP7A and ATP7B both complement yeast null mutant                                                      |
| 2 | YDR286C |       | Putative protein of unknown function; predicted to have thiol-disulfide oxidoreductase active site                                                                                                                                                                                                                                                                                                                                                             |
| 2 | YDR290W |       | Dubious open reading frame; unlikely to encode a functional protein, based on available experimental and comparative sequence data; partially overlaps the verified ORF RTT103                                                                                                                                                                                                                                                                                 |
| 2 | YDR297W | SUR2  | Sphinganine C4-hydroxylase; catalyses the conversion of sphinganine to phytosphingosine in sphingolipid biosynthesis                                                                                                                                                                                                                                                                                                                                           |

|   |         |      |                                                                                                                                                                                                                                                                                                                                                                                                                                                                                 |
|---|---------|------|---------------------------------------------------------------------------------------------------------------------------------------------------------------------------------------------------------------------------------------------------------------------------------------------------------------------------------------------------------------------------------------------------------------------------------------------------------------------------------|
| 2 | YDR305C | HNT2 | Dinucleoside triphosphate hydrolase; has similarity to the tumor suppressor FHIT and belongs to the histidine triad (HIT) superfamily of nucleotide-binding proteins                                                                                                                                                                                                                                                                                                            |
| 2 | YDR307W | PMT7 | Putative protein mannosyltransferase similar to Pmt1p; has a potential role in protein O-glycosylation                                                                                                                                                                                                                                                                                                                                                                          |
| 2 | YDR315C | IPK1 | Inositol 1,3,4,5,6-pentakisphosphate 2-kinase; nuclear protein required for synthesis of 1,2,3,4,5,6-hexakisphosphate (phytate), which is integral to cell function; has 2 motifs conserved in other fungi; ipk1 gle1 double mutant is inviable; human IPPK can complement ipk1 null mutant                                                                                                                                                                                     |
| 2 | YDR323C | PEP7 | Adaptor protein involved in vesicle-mediated vacuolar protein sorting; multivalent adaptor protein; facilitates vesicle-mediated vacuolar protein sorting by ensuring high-fidelity vesicle docking and fusion, which are essential for targeting of vesicles to the endosome; required for vacuole inheritance                                                                                                                                                                 |
| 2 | YDR326C | YSP2 | Sterol-binding protein; has a probable role in retrograde transport of sterols from the plasma membrane to the ER; contains two StART-like domains that bind sterols and a GRAM domain; co-localizes to puncta in the cortical ER with Sip3p; one of six StART-like domain-containing proteins in yeast that may be involved in sterol transfer between intracellular membranes; conserved across eukaryotes                                                                    |
| 2 | YDR334W | SWR1 | Swi2/Snf2-related ATPase; structural component of the SWR1 complex, which exchanges histone variant H2AZ (Htz1p) for chromatin-bound histone H2A; relocates to the cytosol in response to hypoxia; chronological aging factor that mediates lifespan extension by dietary restriction                                                                                                                                                                                           |
| 2 | YDR347W | MRP1 | Mitochondrial ribosomal protein of the small subunit; MRP1 exhibits genetic interactions with PET122, encoding a COX3-specific translational activator, and with PET123, encoding a small subunit mitochondrial ribosomal protein                                                                                                                                                                                                                                               |
| 2 | YDR348C | PAL1 | Protein of unknown function thought to be involved in endocytosis; physically interacts with Ede1p and is found at endocytic sites at cell periphery during early stages of endocytosis; green fluorescent protein (GFP)-fusion protein localizes to bud neck; potential Cdc28p substrate; similar to <i>S. pombe</i> Pal1 protein; relocates from bud neck to cytoplasm upon DNA replication stress; PAL1 has a paralog, YHR097C, that arose from the whole genome duplication |
| 2 | YDR349C | YPS7 | Putative GPI-anchored aspartic protease; member of the yapsin family of proteases involved in cell wall growth and maintenance; located in the cytoplasm and endoplasmic reticulum                                                                                                                                                                                                                                                                                              |
| 2 | YDR352W | YPQ2 | Putative vacuolar membrane transporter for cationic amino acids; likely contributes to amino acid homeostasis by exporting cationic amino acids from the vacuole; member of the PQ-loop family, with seven transmembrane domains; mutant phenotype is functionally complemented by rat PQLC2 vacuolar transporter                                                                                                                                                               |
| 2 | YDR358W | GGA1 | Golgi-localized protein with homology to gamma-adaptin; interacts with and regulates Arf1p and Arf2p in a GTP-dependent manner in order to facilitate traffic through the late Golgi; GGA1                                                                                                                                                                                                                                                                                      |



|   |           |       |                                                                                                                                                                                                                                                                                                                                                                                                                                                                                              |
|---|-----------|-------|----------------------------------------------------------------------------------------------------------------------------------------------------------------------------------------------------------------------------------------------------------------------------------------------------------------------------------------------------------------------------------------------------------------------------------------------------------------------------------------------|
|   |           |       | has a paralog, GGA2, that arose from the whole genome duplication                                                                                                                                                                                                                                                                                                                                                                                                                            |
| 2 | YDR363W   | ESC2  | Sumo-like domain protein; prevents accumulation of toxic intermediates during replication-associated recombinational repair; roles in silencing, lifespan, chromatid cohesion and the intra-S-phase DNA damage checkpoint; RENi family member                                                                                                                                                                                                                                                |
| 2 | YDR363W-A | SEM1  | 19S proteasome regulatory particle lid subcomplex component; role in Ub-dependent proteolysis and proteasome stability; involved in TREX-2 mediated mRNA export, and in the prevention of transcription-associated genome instability; ubiquitinated by Nedd4-like E3-ligase, Rsp5p; human ortholog DSS1, a BRCA1 binding protein implicated in cancer, complements the yeast null; drives trinucleotide repeat expansion; protein abundance increases in response to DNA replication stress |
| 2 | YDR374C   | PHO92 | Posttranscriptional regulator of phosphate metabolism; facilitates PHO4 mRNA degradation by interacting with Pop2p; regulates PHO4 mRNA stability by binding to PHO4's 3'UTR in a phosphate-dependent manner; contains highly conserved YTH (YT521-B Homology) domain that exhibits RNA-binding activity; human homolog YTHDF2 can complement yeast null mutant                                                                                                                              |
| 2 | YDR383C   | NKP1  | Central kinetochore protein and subunit of the Ctf19 complex; mutants have elevated rates of chromosome loss; orthologous to fission yeast kinetochore protein fta4                                                                                                                                                                                                                                                                                                                          |
| 2 | YDR384C   | ATO3  | Plasma membrane protein, putative ammonium transporter; regulation pattern suggests a possible role in export of ammonia from the cell; phosphorylated in mitochondria; member of the TC 9.B.33 YaaH family of putative transporters                                                                                                                                                                                                                                                         |
| 2 | YDR385W   | EFT2  | Elongation factor 2 (EF-2), also encoded by EFT1; catalyzes ribosomal translocation during protein synthesis; contains diphthamide, the unique posttranslationally modified histidine residue specifically ADP-ribosylated by diphtheria toxin; EFT2 has a paralog, EFT1, that arose from the whole genome duplication                                                                                                                                                                       |
| 2 | YDR392W   | SPT3  | Subunit of the SAGA and SAGA-like transcriptional regulatory complexes; interacts with Spt15p to activate transcription of some RNA polymerase II-dependent genes, also functions to inhibit transcription at some promoters; relocalizes to the cytosol in response to hypoxia                                                                                                                                                                                                              |
| 2 | YDR399W   | HPT1  | Dimeric hypoxanthine-guanine phosphoribosyltransferase; catalyzes the transfer of the phosphoribosyl portion of 5-phosphoribosyl-alpha-1-pyrophosphate to a purine base (either guanine or hypoxanthine) to form pyrophosphate and a purine nucleotide (either guanosine monophosphate or inosine monophosphate); mutations in the human homolog HPRT1 can cause Lesch-Nyhan syndrome and Kelley-Seegmiller syndrome                                                                         |
| 2 | YDR400W   | URH1  | Uridine nucleosidase (uridine-cytidine N-ribohydrolase); cleaves N-glycosidic bonds in nucleosides; involved in the pyrimidine salvage and nicotinamide riboside salvage pathways                                                                                                                                                                                                                                                                                                            |
| 2 | YDR417C   |       | Dubious open reading frame; unlikely to encode a functional protein, based on available experimental and comparative                                                                                                                                                                                                                                                                                                                                                                         |

|   |         |       |                                                                                                                                                                                                                                                                                                                                                                                                                                                                                                 |
|---|---------|-------|-------------------------------------------------------------------------------------------------------------------------------------------------------------------------------------------------------------------------------------------------------------------------------------------------------------------------------------------------------------------------------------------------------------------------------------------------------------------------------------------------|
|   |         |       | sequence data; partially overlaps the verified ORF RPL12B/YDR418W                                                                                                                                                                                                                                                                                                                                                                                                                               |
| 2 | YDR419W | RAD30 | DNA polymerase eta; involved in translesion synthesis during post-replication repair; catalyzes the synthesis of DNA opposite cyclobutane pyrimidine dimers and other lesions; involved in formation of post-replicative damage-induced genome-wide cohesion; may also have a role in protection against mitochondrial mutagenesis; mutations in human pol eta are responsible for XPV                                                                                                          |
| 2 | YDR421W | ARO80 | Zinc finger transcriptional activator of the Zn2Cys6 family; activates transcription of aromatic amino acid catabolic genes in the presence of aromatic amino acids                                                                                                                                                                                                                                                                                                                             |
| 2 | YDR422C | SIP1  | Alternate beta-subunit of the Snf1p kinase complex; may confer substrate specificity; vacuolar protein containing KIS (Kinase-Interacting Sequence) and ASC (Association with Snf1 kinase Complex) domains involved in protein interactions                                                                                                                                                                                                                                                     |
| 2 | YDR431W |       | Dubious open reading frame; unlikely to encode a functional protein, based on available experimental and comparative sequence data                                                                                                                                                                                                                                                                                                                                                              |
| 2 | YDR432W | NPL3  | RNA-binding protein; promotes elongation, regulates termination, and carries poly(A) mRNA from nucleus to cytoplasm; represses translation initiation by binding eIF4G; required for pre-mRNA splicing; interacts with E3 ubiquitin ligase Bre1p, linking histone ubiquitination to mRNA processing; may have role in telomere maintenance; dissociation from mRNAs promoted by Mtr10p; phosphorylated by Sky1p in cytoplasm; protein abundance increases in response to DNA replication stress |
| 2 | YDR435C | PPM1  | Carboxyl methyltransferase; methylates the C terminus of the protein phosphatase 2A catalytic subunit (Pph21p or Pph22p), which is important for complex formation with regulatory subunits; required for methionine to inhibit autophagy and promote growth                                                                                                                                                                                                                                    |
| 2 | YDR465C | RMT2  | Arginine N5 methyltransferase; methylates ribosomal protein Rpl12 (L12) on Arg67; relative distribution to the nucleus increases upon DNA replication stress                                                                                                                                                                                                                                                                                                                                    |
| 2 | YDR475C | JIP4  | Protein of unknown function; previously annotated as two separate ORFs, YDR474C and YDR475C, which were merged as a result of corrections to the systematic reference sequence; JIP4 has a paralog, YOR019W, that arose from the whole genome duplication                                                                                                                                                                                                                                       |
| 2 | YDR482C | CWC21 | Protein involved in RNA splicing by the spliceosome; component of a complex containing Cef1p; interacts genetically with ISY1 and BUD13; may bind RNA; has similarity to <i>S. pombe</i> Cwf21p                                                                                                                                                                                                                                                                                                 |
| 2 | YDR490C | PKH1  | Serine/threonine protein kinase; involved in sphingolipid-mediated signaling pathway that controls endocytosis; activates Ypk1p and Ykr2p, components of signaling cascade required for maintenance of cell wall integrity; contains a PH-like domain; redundant with Pkh2p; PKH1 has a paralog, PKH2, that arose from the whole genome duplication                                                                                                                                             |
| 2 | YDR516C | EMI2  | Non-essential protein of unknown function; required for transcriptional induction of the early meiotic-specific transcription                                                                                                                                                                                                                                                                                                                                                                   |

|   |           |       |                                                                                                                                                                                                                                                                                                                                                                                                                                                                                |
|---|-----------|-------|--------------------------------------------------------------------------------------------------------------------------------------------------------------------------------------------------------------------------------------------------------------------------------------------------------------------------------------------------------------------------------------------------------------------------------------------------------------------------------|
|   |           |       | factor IME1; required for sporulation; expression regulated by glucose-repression transcription factors Mig1/2p; EMI2 has a paralog, GLK1, that arose from the whole genome duplication; protein abundance increases in response to DNA replication stress                                                                                                                                                                                                                     |
| 2 | YDR518W   | EUG1  | Protein disulfide isomerase of the endoplasmic reticulum lumen; EUG1 has a paralog, PDI1, that arose from the whole genome duplication; function overlaps with that of Pdi1p; may interact with nascent polypeptides in the ER                                                                                                                                                                                                                                                 |
| 2 | YDR533C   | HSP31 | Methylglyoxalase that converts methylglyoxal to D-lactate; involved in oxidative stress resistance, diauxic shift, and stationary phase survival; has similarity to E. coli Hsp31 and C. albicans Glx3p; member of the DJ-1/ThiJ/PfpI superfamily, which includes human DJ-1 involved in Parkinson's disease and cancer; exists as a dimer and contains a putative metal-binding site; protein abundance increases in response to DNA replication stress                       |
| 2 | YDR535C   |       | Dubious open reading frame; unlikely to encode a functional protein, based on available experimental and comparative sequence data; YDR535C is not an essential gene                                                                                                                                                                                                                                                                                                           |
| 2 | YDR540C   | IRC4  | Protein of unknown function; null mutant displays increased levels of spontaneous Rad52p foci; green fluorescent protein (GFP)-fusion protein localizes to the cytoplasm and nucleus                                                                                                                                                                                                                                                                                           |
| 2 | YEL001C   | IRC22 | Protein of unknown function; green fluorescent protein (GFP)-fusion localizes to the ER; YEL001C is non-essential; null mutant displays increased levels of spontaneous Rad52p foci                                                                                                                                                                                                                                                                                            |
| 2 | YEL009C   | GCN4  | bZIP transcriptional activator of amino acid biosynthetic genes; activator responds to amino acid starvation; expression is tightly regulated at both the transcriptional and translational levels                                                                                                                                                                                                                                                                             |
| 2 | YEL017C-A | PMP2  | Proteolipid associated with plasma membrane H(+)-ATPase (Pma1p); regulates plasma membrane H(+)-ATPase activity; protein abundance increases in response to DNA replication stress; PMP2 has a paralog, PMP1, that arose from the whole genome duplication                                                                                                                                                                                                                     |
| 2 | YEL017W   | GTT3  | Protein of unknown function may be involved in glutathione metabolism; function suggested by computational analysis of large-scale protein-protein interaction data; N- and C-terminal fusion proteins localize to the cell periphery                                                                                                                                                                                                                                          |
| 2 | YEL024W   | RIP1  | Ubiquinol-cytochrome-c reductase; a Rieske iron-sulfur protein of the mitochondrial cytochrome bc1 complex; transfers electrons from ubiquinol to cytochrome c1 during respiration; during import, Rip1p is first imported into the mitochondrial matrix where it is processed, acquires its Fe-S cluster, and is folded, then is translocated into the inner membrane by the action of a homooligomer of Bcs1p, and finally is delivered by Bcs1p to Complex III for assembly |
| 2 | YEL027W   | VMA3  | Proteolipid subunit c of the V0 domain of vacuolar H(+)-ATPase; dicyclohexylcarbodiimide binding subunit; required for vacuolar acidification and important for copper and iron metal ion homeostasis                                                                                                                                                                                                                                                                          |
| 2 | YEL040W   | UTR2  | Chitin transglycosylase; functions in the transfer of chitin to beta(1-6) and beta(1-3) glucans in the cell wall; similar to and                                                                                                                                                                                                                                                                                                                                               |

|   |           |        |                                                                                                                                                                                                                                                                                                                                                                                                                            |
|---|-----------|--------|----------------------------------------------------------------------------------------------------------------------------------------------------------------------------------------------------------------------------------------------------------------------------------------------------------------------------------------------------------------------------------------------------------------------------|
|   |           |        | functionally redundant with Crh1; glycosylphosphatidylinositol (GPI)-anchored protein localized to bud neck                                                                                                                                                                                                                                                                                                                |
| 2 | YEL045C   |        | Dubious open reading frame; unlikely to encode a functional protein, based on available experimental and comparative sequence data; deletion gives MMS sensitivity, growth defect under alkaline conditions, less than optimal growth upon citric acid stress                                                                                                                                                              |
| 2 | YEL046C   | GLY1   | Threonine aldolase; catalyzes the cleavage of L-allo-threonine and L-threonine to glycine; involved in glycine biosynthesis                                                                                                                                                                                                                                                                                                |
| 2 | YEL051W   | VMA8   | Subunit D of the V1 peripheral membrane domain of V-ATPase; part of the electrogenic proton pump found throughout the endomembrane system; plays a role in the coupling of proton transport and ATP hydrolysis; the V1 peripheral membrane domain of the vacuolar H <sup>+</sup> -ATPase (V-ATPase) has eight subunits                                                                                                     |
| 2 | YEL054C   | RPL12A | Ribosomal 60S subunit protein L12A; rpl12a rpl12b double mutant exhibits slow growth and slow translation; homologous to mammalian ribosomal protein L12 and bacterial L11; RPL12A has a paralog, RPL12B, that arose from the whole genome duplication                                                                                                                                                                     |
| 2 | YEL063C   | CAN1   | Plasma membrane arginine permease; requires phosphatidyl ethanolamine (PE) for localization, exclusively associated with lipid rafts; mutation confers canavanine resistance; CAN1 has a paralog, ALP1, that arose from the whole genome duplication                                                                                                                                                                       |
| 2 | YEL067C   |        | Putative protein of unknown function; the authentic, non-tagged protein is detected in highly purified mitochondria in high-throughput studies                                                                                                                                                                                                                                                                             |
| 2 | YER019C-A | SBH2   | Ssh1p-Sss1p-Sbh2p complex component; involved in protein translocation into the endoplasmic reticulum; SBH2 has a paralog, SBH1, that arose from the whole genome duplication                                                                                                                                                                                                                                              |
| 2 | YER038W-A | FMP49  | Mitochondrial protein of unknown function; almost completely overlaps ORF HVG1/YER039C                                                                                                                                                                                                                                                                                                                                     |
| 2 | YER040W   | GLN3   | Transcriptional activator of genes regulated by nitrogen catabolite repression; localization and activity regulated by quality of nitrogen source and Ure2p                                                                                                                                                                                                                                                                |
| 2 | YER049W   | TPA1   | Fe(II)/2-oxoglutarate-dependent dioxygenase family member; catalyzes the repair of methyl-base lesions in both ss and dsDNA by oxidative demethylation; Poly(rA)-binding protein involved in mRNA poly(A) tail length and mRNA stability; role in translation termination efficiency; interacts with Sup45p (eRF1), Sup35p (eRF3) and Pab1p; similar to human prolyl 4-hydroxylase OGFOD1; binds Fe(II) and 2-oxoglutarate |
| 2 | YER051W   | JHD1   | JmjC domain family histone demethylase specific for H3-K36; similar to proteins found in human, mouse, drosophila, X. laevis, C. elegans, and S. pombe                                                                                                                                                                                                                                                                     |
| 2 | YER052C   | HOM3   | Aspartate kinase (L-aspartate 4-P-transferase); cytoplasmic enzyme that catalyzes the first step in the common pathway for methionine and threonine biosynthesis; expression regulated by Gcn4p and the general control of amino acid synthesis                                                                                                                                                                            |

|   |           |        |                                                                                                                                                                                                                                                                                                                                                                                                                                                                                                 |
|---|-----------|--------|-------------------------------------------------------------------------------------------------------------------------------------------------------------------------------------------------------------------------------------------------------------------------------------------------------------------------------------------------------------------------------------------------------------------------------------------------------------------------------------------------|
| 2 | YER056C-A | RPL34A | Ribosomal 60S subunit protein L34A; homologous to mammalian ribosomal protein L34, no bacterial homolog; RPL34A has a paralog, RPL34B, that arose from the whole genome duplication                                                                                                                                                                                                                                                                                                             |
| 2 | YER061C   | CEM1   | Mitochondrial beta-keto-acyl synthase; possible role in fatty acid synthesis; required for mitochondrial respiration; human homolog OXSM can complement yeast cem1 null mutant                                                                                                                                                                                                                                                                                                                  |
| 2 | YER065C   | ICL1   | Isocitrate lyase; catalyzes the formation of succinate and glyoxylate from isocitrate, a key reaction of the glyoxylate cycle; expression of ICL1 is induced by growth on ethanol and repressed by growth on glucose                                                                                                                                                                                                                                                                            |
| 2 | YER068C-A |        | Dubious open reading frame; unlikely to encode a functional protein, based on available experimental and comparative sequence data; overlaps ORF ARG5,6/YER069W                                                                                                                                                                                                                                                                                                                                 |
| 2 | YER068W   | MOT2   | Ubiquitin-protein ligase subunit of the CCR4-NOT complex; with Ubc4p, ubiquitinates nascent polypeptide-associated complex subunits and histone demethylase Jhd2p; CCR4-NOT has roles in transcription regulation, mRNA degradation, and post-transcriptional modifications; regulates levels of DNA Polymerase- $\alpha$ to promote efficient and accurate DNA replication                                                                                                                     |
| 2 | YER069W   | ARG5,6 | Acetylglutamate kinase and N-acetyl-gamma-glutamyl-phosphate reductase; N-acetyl-L-glutamate kinase (NAGK) catalyzes the 2nd and N-acetyl-gamma-glutamyl-phosphate reductase (NAGSA), the 3rd step in arginine biosynthesis; synthesized as a precursor which is processed in the mitochondrion to yield mature NAGK and NAGSA; enzymes form a metabolon complex with Arg2p; NAGK C-terminal domain stabilizes the enzymes, slows catalysis and is involved in feed-back inhibition by arginine |
| 2 | YER071C   | TDA2   | Protein of unknown function; green fluorescent protein (GFP)-fusion protein localizes to the cytoplasm in a punctate pattern; null mutant is sensitive to expression of the top1-T722A allele                                                                                                                                                                                                                                                                                                   |
| 2 | YER072W   | VTC1   | Regulatory subunit of the vacuolar transporter chaperone (VTC) complex; VTC complex is involved in membrane trafficking, vacuolar polyphosphate accumulation, microautophagy and non-autophagic vacuolar fusion; also has mRNA binding activity; protein abundance increases in response to DNA replication stress                                                                                                                                                                              |
| 2 | YER073W   | ALD5   | Mitochondrial aldehyde dehydrogenase; involved in regulation or biosynthesis of electron transport chain components and acetate formation; activated by K <sup>+</sup> ; utilizes NADP <sup>+</sup> as the preferred coenzyme; constitutively expressed                                                                                                                                                                                                                                         |
| 2 | YER097W   |        | Dubious open reading frame; unlikely to encode a functional protein, based on available experimental and comparative sequence data                                                                                                                                                                                                                                                                                                                                                              |
| 2 | YER106W   | MAM1   | Monopolin; meiosis-specific kinetochore-associated protein involved in monopolar attachment of sister kinetochores to the meiotic spindle; subunit of monopolin, a complex that prevents biorientation of sister kinetochores to ensure homolog biorientation during meiosis I; regulates the conformation, enzyme kinetics and substrate specificity of the Dsn1p kinase, Hrr1p; expressed only during the first meiotic division                                                              |

|   |         |      |                                                                                                                                                                                                                                                                                                                                                                                                                                                                                                    |
|---|---------|------|----------------------------------------------------------------------------------------------------------------------------------------------------------------------------------------------------------------------------------------------------------------------------------------------------------------------------------------------------------------------------------------------------------------------------------------------------------------------------------------------------|
| 2 | YER109C | FLO8 | Transcription factor; required for flocculation, diploid filamentous growth, and haploid invasive growth; forms a heterodimer with Mss1p that interacts with the Swi/Snf complex during transcriptional activation of FLO1, FLO11, and STA1; <i>S. cerevisiae</i> genome reference strain S288C contains an internal in-frame stop at codon 142, which in other strains encodes tryptophan                                                                                                         |
| 2 | YER135C |      | Putative protein of unknown function; conserved among <i>S. cerevisiae</i> strains; YER135C is not an essential gene                                                                                                                                                                                                                                                                                                                                                                               |
| 2 | YER150W | SPI1 | GPI-anchored cell wall protein involved in weak acid resistance; basal expression requires Msn2p/Msn4p; expression is induced under conditions of stress and during the diauxic shift; SPI1 has a paralogue, SED1, that arose from the whole genome duplication                                                                                                                                                                                                                                    |
| 2 | YER151C | UBP3 | Ubiquitin-specific protease involved in transport and osmotic response; negatively regulates Ras/PKA signaling; interacts with Bre5p to coregulate anterograde, retrograde transport between ER and Golgi; involved in transcription elongation in response to osmotic stress through phosphorylation at Ser695 by Hog1p; inhibitor of gene silencing; role in ribophagy; cleaves ubiquitin fusions but not polyubiquitin; protein abundance increases in response to DNA replication stress       |
| 2 | YER155C | BEM2 | Rho GTPase activating protein (RhoGAP); involved in the control of cytoskeleton organization and cellular morphogenesis; required for bud emergence; potential GAP for Rho4p                                                                                                                                                                                                                                                                                                                       |
| 2 | YER164W | CHD1 | Chromatin remodeler that regulates various aspects of transcription; acts in conjunction with Isw1b to regulate chromatin structure and maintain chromatin integrity during transcription elongation by RNAP II by preventing trans-histone exchange over coding regions; contains a chromo domain, a helicase domain and a DNA-binding domain; component of both the SAGA and SLIK complexes                                                                                                      |
| 2 | YER166W | DNF1 | Aminophospholipid translocase (flippase); type 4 P-type ATPase; involved in phospholipid translocation, contributing to endocytosis, protein transport, and cellular polarization; localizes primarily to the plasma membrane; localizes to the shmoo tip where it has a redundant role in the cellular response to mating pheromone; DNF1 has a paralogue, DNF2, that arose from the whole genome duplication                                                                                     |
| 2 | YER169W | RPH1 | JmjC domain-containing histone demethylase; targets tri- and dimethylated H3K36; associates with actively transcribed regions and promotes elongation; repressor of autophagy-related genes in nutrient-replete conditions; damage-responsive repressor of PHR1; phosphorylated by the Rad53p-dependent DNA damage checkpoint pathway and by a Rim1p-mediated event during starvation; target of stress-induced hormesis; RPH1 has a paralogue, GIS1, that arose from the whole genome duplication |
| 2 | YER170W | ADK2 | Mitochondrial adenylate kinase; catalyzes the reversible synthesis of GTP and AMP from GDP and ADP; may serve as a back-up for synthesizing GTP or ADP depending on metabolic conditions; 3' sequence of ADK2 varies with strain background                                                                                                                                                                                                                                                        |

|   |         |       |                                                                                                                                                                                                                                                                                                                                                                                                                                                        |
|---|---------|-------|--------------------------------------------------------------------------------------------------------------------------------------------------------------------------------------------------------------------------------------------------------------------------------------------------------------------------------------------------------------------------------------------------------------------------------------------------------|
| 2 | YER173W | RAD24 | Checkpoint protein; involved in the activation of the DNA damage and meiotic pachytene checkpoints; subunit of a clamp loader that loads Rad17p-Mec3p-Ddc1p onto DNA; homolog of human and <i>S. pombe</i> Rad17 protein                                                                                                                                                                                                                               |
| 2 | YER174C | GRX4  | Glutathione-dependent oxidoreductase; hydroperoxide and superoxide-radical responsive; monothiol glutaredoxin subfamily member along with Grx3p and Grx5p; protects cells from oxidative damage; with Grx3p, binds to Aft1p in iron-replete conditions, promoting its dissociation from promoters; mutant has increased aneuploidy tolerance; transcription regulated by Yap5p; GRX4 has a paralog, GRX3, that arose from the whole genome duplication |
| 2 | YER176W | ECM32 | DNA dependent ATPase/DNA helicase; helicase belonging to the Dna2p- and Nam7p-like family of helicases that is involved in modulating translation termination; interacts with the translation termination factors, localized to polysomes                                                                                                                                                                                                              |
| 2 | YER182W | FMP10 | Putative protein of unknown function; the authentic, non-tagged protein is detected in highly purified mitochondria in high-throughput studies                                                                                                                                                                                                                                                                                                         |
| 2 | YER183C | FAU1  | 5,10-methenyltetrahydrofolate synthetase; involved in folic acid biosynthesis                                                                                                                                                                                                                                                                                                                                                                          |
| 2 | YER185W | PUG1  | Plasma membrane protein involved in protoporphyrin and heme transport; roles in the uptake of protoporphyrin IX and the efflux of heme; expression is induced under both low-heme and low-oxygen conditions; member of the fungal lipid-translocating exporter (LTE) family of proteins                                                                                                                                                                |
| 2 | YFL006W |       | Merged open reading frame; does not encode a discrete protein; YFL006W was originally annotated as an independent ORF, but as a result of a sequence change, it was merged with an adjacent ORF into a single reading frame, designated YFL007W                                                                                                                                                                                                        |
| 2 | YFL007W | BLM10 | Proteasome activator; binds the core proteasome (CP) and stimulates proteasome-mediated protein degradation by inducing gate opening; required for sequestering CP into proteasome storage granule (PSG) during quiescent phase and for nuclear import of CP in proliferating cells; required for resistance to bleomycin, may be involved in protecting against oxidative damage; similar to mammalian PA200                                          |
| 2 | YFL019C |       | Putative protein of unknown function; conserved across <i>S. cerevisiae</i> strains; YFL019C is not an essential gene                                                                                                                                                                                                                                                                                                                                  |
| 1 | YFL020C | PAU5  | Member of the seripauperin multigene family; encoded mainly in subtelomeric regions; induced during alcoholic fermentation; induced by low temperature and also by anaerobic conditions; negatively regulated by oxygen and repressed by heme                                                                                                                                                                                                          |
| 1 | YFL028C | CAF16 | Part of evolutionarily-conserved CCR4-NOT regulatory complex; contains single ABC-type ATPase domain but no transmembrane domain; interacts with several subunits of Mediator                                                                                                                                                                                                                                                                          |
| 1 | YFL031W | HAC1  | Basic leucine zipper (bZIP) transcription factor (ATF/CREB1 homolog); regulates the unfolded protein response, via UPRE binding, and membrane biogenesis; ER stress-induced splicing pathway facilitates efficient Hac1p synthesis; two functional forms                                                                                                                                                                                               |

|   |           |        |                                                                                                                                                                                                                                                                                                                                                                                                                                        |
|---|-----------|--------|----------------------------------------------------------------------------------------------------------------------------------------------------------------------------------------------------------------------------------------------------------------------------------------------------------------------------------------------------------------------------------------------------------------------------------------|
|   |           |        | of Hac1p are produced; translation initiation is repressed under non-stress conditions; protein abundance increases in response to DNA replication stress                                                                                                                                                                                                                                                                              |
| 1 | YFL032W   |        | Dubious open reading frame; unlikely to encode a functional protein, based on available experimental and comparative sequence data; partially overlaps the verified gene HAC1/YFL031W; YFL032W is not an essential gene                                                                                                                                                                                                                |
| 1 | YFL034C-A | RPL22B | Ribosomal 60S subunit protein L22A; required for translation of long 5' UTR of IME1 mRNA and meiotic entry; homologous to mammalian ribosomal protein L22, no bacterial homolog; RPL22B has a paralog, RPL22A, that arose from the whole genome duplication                                                                                                                                                                            |
| 1 | YFL042C   | LAM5   | Putative sterol transfer protein; one of six StART-like domain-containing proteins in yeast that may be involved in sterol transfer between intracellular membranes; conserved across eukaryotes; has both GRAM and StART-like (VAST) domains; localizes to membrane contact sites throughout the cell, including nucleus-vacuole junctions and ER-mitochondrial contact sites                                                         |
| 1 | YFL055W   | AGP3   | Low-affinity amino acid permease; may act to supply the cell with amino acids as nitrogen source in nitrogen-poor conditions; transcription is induced under conditions of sulfur limitation; plays a role in regulating Ty1 transposition                                                                                                                                                                                             |
| 1 | YFR010W   | UBP6   | Ubiquitin-specific protease; situated in the base subcomplex of the 26S proteasome, releases free ubiquitin from branched polyubiquitin chains en bloc, rather than from the distal tip of the chain; negatively regulates degradation of ubiquitinated proteins by the proteasome; works in opposition to Hul5p polyubiquitin elongation activity; mutant has aneuploidy tolerance; human homolog UBP14 complements yeast null mutant |
| 1 | YFR024C-A | LSB3   | Protein containing a C-terminal SH3 domain; binds Las17p, which is a homolog of human Wiskott-Aldrich Syndrome protein involved in actin patch assembly and actin polymerization; protein abundance increases in response to DNA replication stress; LSB3 has a paralog, YSC84, that arose from the whole genome duplication                                                                                                           |
| 1 | YFR026C   | ULI1   | Protein of unknown function; involved in and induced by the endoplasmic reticulum unfolded protein response (UPR); SWAT-GFP and mCherry fusion proteins localize to the endoplasmic reticulum                                                                                                                                                                                                                                          |
| 1 | YFR032C   | RRT5   | Putative protein of unknown function; non-essential gene identified in a screen for mutants with increased levels of rDNA transcription; expressed at high levels during sporulation                                                                                                                                                                                                                                                   |
| 1 | YFR043C   | IRC6   | Clathrin coat accessory factor; involved in clathrin-mediated vesicle trafficking; may function to link the AP-1 clathrin adaptor complex with the Rab GTPase Ypt31p; has structural similarity to G-proteins; mouse homolog Aagab (p34) functionally complements irc6 null mutation; null mutant displays increased levels of spontaneous Rad52p foci                                                                                 |
| 1 | YFR046C   | CNN1   | Kinetochores protein; associated with the essential kinetochores proteins Nnf1p and Spc24p; phosphorylated by Clb5-Cdk1,                                                                                                                                                                                                                                                                                                               |



|   |         |       |                                                                                                                                                                                                                                                                                                                                                                                                                                                 |
|---|---------|-------|-------------------------------------------------------------------------------------------------------------------------------------------------------------------------------------------------------------------------------------------------------------------------------------------------------------------------------------------------------------------------------------------------------------------------------------------------|
|   |         |       | Mps1p, Ipl1p and to a lesser extent by Clb2-Cdk1; localizes to the lower region of the Ndc80 complex during anaphase and regulates KMN activity by inhibiting the Mtw1 and Spc105 complexes from binding to the Ndc80 complex; similar to metazoan CENP-T                                                                                                                                                                                       |
| 1 | YGL013C | PDR1  | Transcription factor that regulates the pleiotropic drug response; zinc cluster protein that is a master regulator involved in recruiting other zinc cluster proteins to pleiotropic drug response elements (PDREs) to fine tune the regulation of multidrug resistance genes; relocalizes to the cytosol in response to hypoxia; PDR1 has a paralog, PDR3, that arose from the whole genome duplication                                        |
| 1 | YGL014W | PUF4  | Member of the PUF protein family; PUF family is defined by the presence of Pumilio homology domains that confer RNA binding activity; preferentially binds mRNAs encoding nucleolar ribosomal RNA-processing factors                                                                                                                                                                                                                            |
| 1 | YGL025C | PGD1  | Subunit of the RNA polymerase II mediator complex; associates with core polymerase subunits to form the RNA polymerase II holoenzyme; essential for basal and activated transcription; direct target of Cyc8p-Tup1p transcriptional corepressor                                                                                                                                                                                                 |
| 1 | YGL027C | CWH41 | Processing alpha glucosidase I; ER type II integral membrane N-glycoprotein involved in assembly of cell wall beta 1,6 glucan and asparagine-linked protein glycosylation; also involved in ER protein quality control and sensing of ER stress                                                                                                                                                                                                 |
| 1 | YGL028C | SCW11 | Cell wall protein with similarity to glucanases; may play a role in conjugation during mating based on its regulation by Ste12p                                                                                                                                                                                                                                                                                                                 |
| 1 | YGL033W | HOP2  | Meiosis-specific protein that localizes to chromosomes; prevents synapsis between nonhomologous chromosomes and ensures synapsis between homologs; complexes with Mnd1p to promote homolog pairing and meiotic double-strand break repair; heterodimer of Hop2p-Mnd1p stimulates the Dmc1p-mediated strand invasion                                                                                                                             |
| 1 | YGL064C | MRH4  | Mitochondrial ATP-dependent RNA helicase of the DEAD-box family; required for assembly of the large subunit of mitochondrial ribosomes; binds to the large subunit rRNA, 21S_rRNA; localizes to the matrix face of the mitochondrial inner membrane and associates with the large subunit precursor and with mature ribosomes                                                                                                                   |
| 1 | YGL066W | SGF73 | Subunit of DUBm module of SAGA and SLIK; has roles in anchoring deubiquitination module (DUBm) into SAGA and SLIK complexes, maintaining organization and ubiquitin-binding conformation of Ubp8p, thereby contributing to overall DUBm activity; involved in preinitiation complex assembly at promoters; relocalizes to cytosol under hypoxia; human homolog ATXN7 implicated in spinocerebellar ataxia, and can complement yeast null mutant |
| 1 | YGL071W | AFT1  | Transcription factor involved in iron utilization and homeostasis; binds consensus site PyPuCACCCPu and activates transcription in response to changes in iron availability; in iron-replete conditions localization is regulated by Grx3p, Grx4p, and Fra2p, and promoter binding is negatively regulated via Grx3p-Grx4p binding; AFT1 has a paralog, AFT2, that arose from the whole                                                         |

|   |         |       |                                                                                                                                                                                                                                                                                                                                                                                                                                             |
|---|---------|-------|---------------------------------------------------------------------------------------------------------------------------------------------------------------------------------------------------------------------------------------------------------------------------------------------------------------------------------------------------------------------------------------------------------------------------------------------|
|   |         |       | genome duplication; relative distribution to the nucleus increases upon DNA replication stress                                                                                                                                                                                                                                                                                                                                              |
| 1 | YGL072C |       | Dubious open reading frame; unlikely to encode a functional protein, based on available experimental and comparative sequence data; partially overlaps the verified gene HSF1; null mutant displays increased resistance to antifungal agents gliotoxin, cycloheximide and H <sub>2</sub> O <sub>2</sub>                                                                                                                                    |
| 1 | YGL080W | MPC1  | Highly conserved subunit of mitochondrial pyruvate carrier (MPC); MPC is a mitochondrial inner membrane complex that mediates pyruvate uptake and comprises Mpc1p and Mpc2p during fermentative growth, or Mpc1p and Mpc3p during respiratory growth; null mutant displays slow growth that is complemented by expression of human or mouse ortholog; mutation in human ortholog MPC1 is associated with lactic acidosis and hyperpyruvemia |
| 1 | YGL084C | GUP1  | Plasma membrane protein involved in remodeling GPI anchors; member of the MBOAT family of putative membrane-bound O-acyltransferases; role in misfolded protein quality control; proposed to be involved in glycerol transport; homolog of the mammalian Hedgehog pathway modulator HHATL; GUP1 has a paralog, GUP2, that arose from the whole genome duplication                                                                           |
| 1 | YGL087C | MMS2  | Ubiquitin-conjugating enzyme variant; involved in error-free postreplication repair; forms a heteromeric complex with Ubc13p, an active ubiquitin-conjugating enzyme; cooperates with chromatin-associated RING finger proteins, Rad18p and Rad5p; protein abundance increases in response to DNA replication stress                                                                                                                        |
| 1 | YGL105W | ARC1  | Protein that binds tRNA and methionyl- and glutamyl-tRNA synthetases; involved in tRNA delivery, stimulating catalysis, and ensuring localization; also binds quadruplex nucleic acids; protein abundance increases in response to DNA replication stress; methionyl-tRNA synthetase is Mes1p; glutamyl-tRNA synthetase is Gus1p                                                                                                            |
| 1 | YGL114W |       | Putative protein of unknown function; predicted member of the oligopeptide transporter (OPT) family of membrane transporters                                                                                                                                                                                                                                                                                                                |
| 1 | YGL117W |       | Putative protein of unknown function                                                                                                                                                                                                                                                                                                                                                                                                        |
| 1 | YGL118C |       | Putative protein of unknown function; conserved among <i>S. cerevisiae</i> strains; YGL118C is not an essential gene                                                                                                                                                                                                                                                                                                                        |
| 1 | YGL121C | GPG1  | Proposed gamma subunit of the heterotrimeric G protein; interacts with the receptor Gpr1p; involved in regulation of pseudohyphal growth; requires Gpb1p or Gpb2p to interact with Gpa2p; overproduction causes prion curing                                                                                                                                                                                                                |
| 1 | YGL125W | MET13 | Major isozyme of methylenetetrahydrofolate reductase; catalyzes the reduction of 5,10-methylenetetrahydrofolate to 5-methyltetrahydrofolate in the methionine biosynthesis pathway                                                                                                                                                                                                                                                          |
| 1 | YGL126W | SCS3  | Protein required for inositol prototrophy; required for normal ER membrane biosynthesis; ortholog of the FIT family of proteins involved in triglyceride droplet biosynthesis and homologous to human FIT2; disputed role in the synthesis of inositol phospholipids from inositol                                                                                                                                                          |

|   |         |       |                                                                                                                                                                                                                                                                                                                                                                                                                                                                                                                                                                                |
|---|---------|-------|--------------------------------------------------------------------------------------------------------------------------------------------------------------------------------------------------------------------------------------------------------------------------------------------------------------------------------------------------------------------------------------------------------------------------------------------------------------------------------------------------------------------------------------------------------------------------------|
| 1 | YGL167C | PMR1  | High affinity Ca <sup>2+</sup> /Mn <sup>2+</sup> P-type ATPase; required for Ca <sup>2+</sup> and Mn <sup>2+</sup> transport into Golgi; involved in Ca <sup>2+</sup> dependent protein sorting, processing; D53A mutant (Mn <sup>2+</sup> transporting) is rapamycin sensitive, Q783A mutant (Ca <sup>2+</sup> transporting) is rapamycin resistant; Mn <sup>2+</sup> transport into Golgi lumen required for rapamycin sensitivity; mutations in human homolog ATP2C1 cause acantholytic skin condition Hailey-Hailey disease; human ATP2C1 can complement yeast null mutant |
| 1 | YGL170C | SPO74 | Component of the meiotic outer plaque of the spindle pole body; involved in modifying the meiotic outer plaque that is required prior to prospore membrane formation                                                                                                                                                                                                                                                                                                                                                                                                           |
| 1 | YGL173C | XRN1  | Evolutionarily-conserved 5'-3' exonuclease; component of cytoplasmic processing (P) bodies involved in mRNA decay; also enters the nucleus and positively regulates transcription initiation and elongation; plays a role in microtubule-mediated processes, filamentous growth, ribosomal RNA maturation, and telomere maintenance; activated by the scavenger decapping enzyme Dcs1p                                                                                                                                                                                         |
| 1 | YGL195W | GCN1  | Positive regulator of the Gcn2p kinase activity; forms a complex with Gcn20p; proposed to stimulate Gcn2p activation by an uncharged tRNA                                                                                                                                                                                                                                                                                                                                                                                                                                      |
| 1 | YGL244W | RTF1  | Subunit of RNAPII-associated chromatin remodeling Paf1 complex; regulates gene expression by directing cotranscriptional histone modification, influences transcription and chromatin structure through several independent functional domains; directly or indirectly regulates DNA-binding properties of Spt15p and relative activities of different TATA elements; involved in transcription elongation as demonstrated by the G-less-based run-on (GLRO) assay                                                                                                             |
| 1 | YGL249W | ZIP2  | Meiosis-specific protein; involved in normal synaptonemal complex formation and pairing between homologous chromosomes during meiosis; relocalizes from mitochondrion to cytoplasm upon DNA replication stress                                                                                                                                                                                                                                                                                                                                                                 |
| 1 | YGL261C | PAU11 | Putative protein of unknown function; member of the seripauperin multigene family encoded mainly in subtelomeric regions; mRNA expression appears to be regulated by SUT1 and UPC2                                                                                                                                                                                                                                                                                                                                                                                             |
| 1 | YGR010W | NMA2  | Nicotinic acid mononucleotide adenylyltransferase; catalyzes the transfer of the adenylyl moiety of ATP to nicotinamide mononucleotide to form NAD; involved in de novo and salvage synthesis of NAD(+); homolog of human NMNAT; NMA2 has a paralog, NMA1, that arose from the whole genome duplication                                                                                                                                                                                                                                                                        |
| 1 | YGR011W |       | Dubious open reading frame; unlikely to encode a functional protein, based on available experimental and comparative sequence data                                                                                                                                                                                                                                                                                                                                                                                                                                             |
| 1 | YGR012W | MCY1  | Putative cysteine synthase; localized to the mitochondrial outer membrane                                                                                                                                                                                                                                                                                                                                                                                                                                                                                                      |
| 1 | YGR015C |       | Putative protein of unknown function; green fluorescent protein (GFP)-fusion protein localizes to the mitochondrion                                                                                                                                                                                                                                                                                                                                                                                                                                                            |
| 1 | YGR026W |       | Putative protein of unknown function; green fluorescent protein (GFP)-fusion protein localizes to the cell periphery                                                                                                                                                                                                                                                                                                                                                                                                                                                           |

|   |         |        |                                                                                                                                                                                                                                                                                                                                                                                                                                                                                                 |
|---|---------|--------|-------------------------------------------------------------------------------------------------------------------------------------------------------------------------------------------------------------------------------------------------------------------------------------------------------------------------------------------------------------------------------------------------------------------------------------------------------------------------------------------------|
| 1 | YGR027C | RPS25A | Protein component of the small (40S) ribosomal subunit; homologous to mammalian ribosomal protein S25, no bacterial homolog; RPS25A has a paralog, RPS25B, that arose from the whole genome duplication                                                                                                                                                                                                                                                                                         |
| 1 | YGR036C | CAX4   | Dolichyl pyrophosphate (Dol-P-P) phosphatase; has a lumenally oriented active site in the ER; cleaves the anhydride linkage in Dol-P-P; required for Dol-P-P-linked oligosaccharide intermediate synthesis and protein N-glycosylation                                                                                                                                                                                                                                                          |
| 1 | YGR041W | BUD9   | Protein involved in bud-site selection; mutant has increased aneuploidy tolerance; diploid mutants display a unipolar budding pattern instead of the wild-type bipolar pattern, and bud at the distal pole; BUD9 has a paralog, BUD8, that arose from the whole genome duplication                                                                                                                                                                                                              |
| 1 | YGR056W | RSC1   | Component of the RSC chromatin remodeling complex; required for expression of mid-late sporulation-specific genes; contains two essential bromodomains, a bromo-adjacent homology (BAH) domain, and an AT hook; RSC1 has a paralog, RSC2, that arose from the whole genome duplication                                                                                                                                                                                                          |
| 1 | YGR057C | LST7   | Subunit of the Lst4p-Lst7p GTPase activating protein complex for Gtr2p; stimulates the GTPase activity of Rag family GTPase Gtr2p, within the context of the Gtr1p-Gtr2p heterodimer, after amino acid stimulation; required for activation of TORC1 in response to amino acid stimulation; recruited to the vacuolar membrane during amino acid starvation and released from the membrane by TORC1; required for the transport of amino acid permease Gap1p from the Golgi to the cell surface |
| 1 | YGR064W |        | Dubious open reading frame; unlikely to encode a functional protein, based on available experimental and comparative sequence data; partially overlaps the verified ORF SPT4/YGR063C                                                                                                                                                                                                                                                                                                            |
| 1 | YGR071C | ENV11  | Protein proposed to be involved in vacuolar functions; mutant shows defect in CPY processing and fragmented vacuoles; deletion mutant has increased glycogen accumulation and displays elongated buds; green fluorescent protein (GFP)-fusion protein localizes to the nucleus; ENV11 has a paralog, VID22, that arose from the whole genome duplication                                                                                                                                        |
| 1 | YGR084C | MRP13  | Mitochondrial ribosomal protein of the small subunit                                                                                                                                                                                                                                                                                                                                                                                                                                            |
| 1 | YGR096W | TPC1   | Mitochondrial membrane transporter; mediates uptake of the essential cofactor thiamine pyrophosphate (ThPP) into mitochondria; expression appears to be regulated by carbon source; member of the mitochondrial carrier family                                                                                                                                                                                                                                                                  |
| 1 | YGR097W | ASK10  | Regulator of the Fps1p glycerol channel; under nonstress conditions, binds to Fps1p to positively regulate glycerol transport; under osmotic stress, multiple phosphorylation by Hog1p causes Ask10p to dissociate from Fps1p; forms homodimers and heterodimerizes with paralog Rgc1p; phosphorylated in response to oxidative stress; has a role in destruction of Ssn8p; associates with RNA polymerase II holoenzyme                                                                        |

|   |         |        |                                                                                                                                                                                                                                                                                                                                                                                                                                                                                           |
|---|---------|--------|-------------------------------------------------------------------------------------------------------------------------------------------------------------------------------------------------------------------------------------------------------------------------------------------------------------------------------------------------------------------------------------------------------------------------------------------------------------------------------------------|
| 1 | YGR100W | MDR1   | Cytoplasmic GTPase-activating protein; activates Ypt/Rab transport GTPases Ypt6p, Ypt31p and Sec4p; involved in recycling of internalized proteins and regulation of Golgi secretory function                                                                                                                                                                                                                                                                                             |
| 1 | YGR104C | SRB5   | Subunit of the RNA polymerase II mediator complex; associates with core polymerase subunits to form the RNA polymerase II holoenzyme; essential for transcriptional regulation; required for proper termination of transcription for some genes; involved in telomere maintenance                                                                                                                                                                                                         |
| 1 | YGR118W | RPS23A | Ribosomal protein 28 (rp28) of the small (40S) ribosomal subunit; required for translational accuracy; homologous to mammalian ribosomal protein S23 and bacterial S12; RPS23A has a paralog, RPS23B, that arose from the whole genome duplication; deletion of both RPS23A and RPS23B is lethal                                                                                                                                                                                          |
| 1 | YGR121C | MEP1   | Ammonium permease; belongs to a ubiquitous family of cytoplasmic membrane proteins that transport only ammonium (NH <sub>4</sub> <sup>+</sup> ); expression is under the nitrogen catabolite repression regulation; human homolog RHCG complements yeast null mutant; mutations in human homolog RHCG implicated in metabolic acidosis; MEP1 has a paralog, MEP3, that arose from the whole genome duplication                                                                            |
| 1 | YGR122W |        | Protein that may be involved in pH regulation; probable ortholog of <i>A. nidulans</i> PalC, which is involved in pH regulation and binds to the ESCRT-III complex; null mutant does not properly process Rim101p and has decreased resistance to rapamycin; GFP-fusion protein is cytoplasmic; relative distribution to cytoplasm increases upon DNA replication stress                                                                                                                  |
| 1 | YGR131W | FHN1   | Protein of unknown function; induced by ketoconazole; promoter region contains sterol regulatory element motif, which has been identified as a Upc2p-binding site; overexpression complements function of Nce102p in NCE102 deletion strain; FHN1 has a paralog, NCE102, that arose from the whole genome duplication                                                                                                                                                                     |
| 1 | YGR136W | LSB1   | Negative regulator of actin nucleation-promoting factor activity; interacts with Las17p, a homolog of human Wiskott-Aldrich Syndrome protein (WASP), via an N-terminal SH3 domain, and along with PIN3 cooperatively inhibits the nucleation of actin filaments; overexpression blocks receptor-mediated endocytosis; protein increases in abundance and forms nuclear foci in response to DNA replication stress; LSB1 has a paralog, PIN3, that arose from the whole genome duplication |
| 1 | YGR142W | BTN2   | v-SNARE binding protein; facilitates specific protein retrieval from a late endosome to the Golgi; modulates arginine uptake, possible role in mediating pH homeostasis between the vacuole and plasma membrane H <sup>(+)</sup> -ATPase; contributes to prion curing; preferentially expressed after severe ethanol stress                                                                                                                                                               |
| 1 | YGR149W | GPC1   | Glycerophosphocholine acyltransferase (GPCAT); involved in phosphatidylcholine (PC) synthesis; uses acetyl-CoA to acylate glycerol-3-phosphocholine to yield lyso-PC; also catalyzes acylation of glycerophosphoethanolamine with acyl-CoA; predicted to be an integral membrane protein                                                                                                                                                                                                  |

|   |         |       |                                                                                                                                                                                                                                                                                                                                                                                                                                                                                                |
|---|---------|-------|------------------------------------------------------------------------------------------------------------------------------------------------------------------------------------------------------------------------------------------------------------------------------------------------------------------------------------------------------------------------------------------------------------------------------------------------------------------------------------------------|
| 1 | YGR153W |       | Putative protein of unknown function                                                                                                                                                                                                                                                                                                                                                                                                                                                           |
| 1 | YGR160W |       | Dubious open reading frame; unlikely to encode a functional protein, based on available experimental and comparative sequence data                                                                                                                                                                                                                                                                                                                                                             |
| 1 | YGR164W |       | Putative protein of unknown function; conserved across <i>S. cerevisiae</i> strains                                                                                                                                                                                                                                                                                                                                                                                                            |
| 1 | YGR169C | PUS6  | tRNA:pseudouridine synthase; catalyzes the conversion of uridine to pseudouridine at position 31 in cytoplasmic and mitochondrial tRNAs; mutation of Asp168 to Ala abolishes enzyme activity; not essential for viability                                                                                                                                                                                                                                                                      |
| 1 | YGR174C | CBP4  | Mitochondrial protein required for assembly of cytochrome bc1 complex; interacts with the Cbp3p-Cbp6p complex and newly synthesized cytochrome b (Cobp) to promote assembly of Cobp into the cytochrome bc1 complex                                                                                                                                                                                                                                                                            |
| 1 | YGR188C | BUB1  | Protein kinase involved in the cell cycle checkpoint into anaphase; in complex with Mad1p and Bub3p, prevents progression into anaphase in presence of spindle damage; Cdc28p-mediated phosphorylation at Bub1p-T566 is important for degradation in anaphase and adaptation of checkpoint to prolonged mitotic arrest; associates with centromere DNA via Skp1p; involved in Sgo1p relocalization in response to sister kinetochore tension; paralog MAD3 arose from whole genome duplication |
| 1 | YGR189C | CRH1  | Chitin transglycosylase; functions in the transfer of chitin to beta(1-6) and beta(1-3) glucans in the cell wall; similar and functionally redundant to Utr2; localizes to sites of polarized growth; expression induced by cell wall stress                                                                                                                                                                                                                                                   |
| 1 | YGR192C | TDH3  | Glyceraldehyde-3-phosphate dehydrogenase (GAPDH), isozyme 3; involved in glycolysis and gluconeogenesis; tetramer that catalyzes the reaction of glyceraldehyde-3-phosphate to 1,3 bis-phosphoglycerate; detected in the cytoplasm and cell wall; GAPDH-derived antimicrobial peptides secreted by <i>S. cerevisiae</i> are active against a wide variety of wine-related yeasts and bacteria; binds AU-rich RNA                                                                               |
| 1 | YGR199W | PMT6  | Protein O-mannosyltransferase; transfers mannose from dolichyl phosphate-D-mannose to protein serine/threonine residues of secretory proteins; reaction is essential for cell wall rigidity; member of a family of mannosyltransferases                                                                                                                                                                                                                                                        |
| 1 | YGR207C | CIR1  | Mitochondrial protein that interacts with frataxin (Yfh1p); putative ortholog of mammalian electron transfer flavoprotein complex subunit ETF-beta; may have a role in oxidative stress response                                                                                                                                                                                                                                                                                               |
| 1 | YGR208W | SER2  | Phosphoserine phosphatase of the phosphoglycerate pathway; involved in serine and glycine biosynthesis, expression is regulated by the available nitrogen source                                                                                                                                                                                                                                                                                                                               |
| 1 | YGR215W | RSM27 | Mitochondrial ribosomal protein of the small subunit                                                                                                                                                                                                                                                                                                                                                                                                                                           |
| 1 | YGR224W | AZR1  | Plasma membrane transporter of the major facilitator superfamily; involved in resistance to azole drugs such as ketoconazole and fluconazole                                                                                                                                                                                                                                                                                                                                                   |
| 1 | YGR240C | PFK1  | Alpha subunit of heterooctameric phosphofructokinase; involved in glycolysis, indispensable for anaerobic growth, activated by                                                                                                                                                                                                                                                                                                                                                                 |

|   |         |       |                                                                                                                                                                                                                                                                                                                                                                                                                                             |
|---|---------|-------|---------------------------------------------------------------------------------------------------------------------------------------------------------------------------------------------------------------------------------------------------------------------------------------------------------------------------------------------------------------------------------------------------------------------------------------------|
|   |         |       | fructose-2,6-bisphosphate and AMP, mutation inhibits glucose induction of cell cycle-related genes                                                                                                                                                                                                                                                                                                                                          |
| 1 | YGR255C | COQ6  | Flavin-dependent monooxygenase involved in ubiquinone biosynthesis; responsible for hydroxylation at position C5 and deamination at C4 during ubiquinone (Coenzyme Q) biosynthesis; localizes to matrix face of mitochondrial inner membrane in a large complex with other ubiquinone biosynthetic enzymes; human homolog COQ6 can complement yeast null mutant and is implicated in steroid-resistant nephrotic syndrome (SRNS)            |
| 1 | YHL003C | LAG1  | Ceramide synthase component; involved in synthesis of ceramide from C26(acyl)-coenzyme A and dihydrosphingosine or phytosphingosine, functionally equivalent to Lac1p; forms ER foci upon DNA replication stress; homolog of human CERS2, a tumor metastasis suppressor gene whose silencing enhances invasion/metastasis of prostate cancer cells; LAG1 has a paralog, LAC1, that arose from the whole genome duplication                  |
| 1 | YHL014C | YLF2  | Protein of unknown function; has weak similarity to E. coli GTP-binding protein gtp1; the authentic, non-tagged protein is detected in highly purified mitochondria in high-throughput studies                                                                                                                                                                                                                                              |
| 1 | YHL016C | DUR3  | Plasma membrane transporter for both urea and polyamines; expression is highly sensitive to nitrogen catabolite repression and induced by allophanate, the last intermediate of the allantoin degradative pathway                                                                                                                                                                                                                           |
| 1 | YHL028W | WSC4  | Endoplasmic reticulum (ER) membrane protein; involved in the translocation of soluble secretory proteins and insertion of membrane proteins into the ER membrane; may also have a role in the stress response but has only partial functional overlap with WSC1-3                                                                                                                                                                           |
| 1 | YHL029C | OCA5  | Cytoplasmic protein required for replication of Brome mosaic virus; <i>S. cerevisiae</i> is a model system for studying replication of positive-strand RNA viruses in their natural hosts                                                                                                                                                                                                                                                   |
| 1 | YHL030W | ECM29 | Scaffold protein; assists in association of the proteasome core particle with the regulatory particle; inhibits proteasomal ATPase activity; degraded by the mature proteasome after assembly; contains HEAT-like repeats; protein increases in abundance and relocalizes from nucleus to cytoplasm upon DNA replication stress                                                                                                             |
| 1 | YHL031C | GOS1  | v-SNARE protein involved in Golgi transport; homolog of the mammalian protein GOS-28/GS28                                                                                                                                                                                                                                                                                                                                                   |
| 1 | YHL033C | RPL8A | Ribosomal 60S subunit protein L8A; required for processing of 27SA3 pre-rRNA to 27SB pre-rRNA during assembly of large ribosomal subunit; depletion leads to a turnover of pre-rRNA; L8 binds to Domain I of 25S and 5.8 S rRNAs; mutation results in decreased amounts of free 60S subunits; homologous to mammalian ribosomal protein L7A, no bacterial homolog; RPL8A has a paralog, RPL8B, that arose from the whole genome duplication |
| 1 | YHL042W |       | Protein of unknown function; member of the DUP380 subfamily of conserved, often subtelomerically-encoded proteins; SWAT-GFP and mCherry fusion proteins localize to the vacuole                                                                                                                                                                                                                                                             |

|   |         |        |                                                                                                                                                                                                                                                                                                                                                                                                                                                                                           |
|---|---------|--------|-------------------------------------------------------------------------------------------------------------------------------------------------------------------------------------------------------------------------------------------------------------------------------------------------------------------------------------------------------------------------------------------------------------------------------------------------------------------------------------------|
| 1 | YHL043W | ECM34  | Protein of unknown function; member of the DUP380 subfamily of conserved, often subtelomerically-encoded proteins; SWAT-GFP, seamless-GFP and mCherry C-terminal fusion proteins localize to the cytosol                                                                                                                                                                                                                                                                                  |
| 1 | YHL044W |        | Putative integral membrane protein; member of DUP240 gene family; green fluorescent protein (GFP)-fusion protein localizes to the plasma membrane in a punctate pattern                                                                                                                                                                                                                                                                                                                   |
| 1 | YHL045W |        | Putative protein of unknown function; not an essential gene                                                                                                                                                                                                                                                                                                                                                                                                                               |
| 1 | YHR010W | RPL27A | Ribosomal 60S subunit protein L27A; homologous to mammalian ribosomal protein L27, no bacterial homolog; RPL27A has a paralog, RPL27B, that arose from the whole genome duplication                                                                                                                                                                                                                                                                                                       |
| 1 | YHR013C | ARD1   | Subunit of protein N-terminal acetyltransferase NatA; NatA comprises Nat1p, Ard1p, Nat5p; acetylates many proteins to influence telomeric silencing, cell cycle, heat-shock resistance, mating, sporulation, early stages of mitophagy; protein abundance increases under DNA replication stress; mutations in human homolog X-linked NAA10 lead to Ogden syndrome (S37P) and intellectual disability (R116W); expression of human NAA10 and NAA15 can complement ard1 nat1 double mutant |
| 1 | YHR015W | MIP6   | Putative RNA-binding protein; interacts with Mex67p, which is a component of the nuclear pore involved in nuclear mRNA export; MIP6 has a paralog, PES4, that arose from the whole genome duplication                                                                                                                                                                                                                                                                                     |
| 1 | YHR017W | YSC83  | Non-essential mitochondrial protein of unknown function; mRNA induced during meiosis, peaking between mid to late prophase of meiosis I; similar to <i>S. douglasii</i> YSD83                                                                                                                                                                                                                                                                                                             |
| 1 | YHR018C | ARG4   | Argininosuccinate lyase; catalyzes the final step in the arginine biosynthesis pathway                                                                                                                                                                                                                                                                                                                                                                                                    |
| 1 | YHR033W |        | Putative protein of unknown function; epitope-tagged protein localizes to the cytoplasm; YHR033W has a paralog, PRO1, that arose from the whole genome duplication                                                                                                                                                                                                                                                                                                                        |
| 1 | YHR037W | PUT2   | Delta-1-pyrroline-5-carboxylate dehydrogenase; nuclear-encoded mitochondrial protein involved in utilization of proline as sole nitrogen source; deficiency of human homolog ALDH4A1 causes type II hyperprolinemia (HPII), an autosomal recessive inborn error of metabolism; human homolog ALDH4A1 can complement yeast null mutant                                                                                                                                                     |
| 1 | YHR038W | RRF1   | Mitochondrial ribosome recycling factor; essential for mitochondrial protein synthesis and for the maintenance of the respiratory function of mitochondria                                                                                                                                                                                                                                                                                                                                |
| 1 | YHR044C | DOG1   | 2-deoxyglucose-6-phosphate phosphatase; member of a family of low molecular weight phosphatases; confers 2-deoxyglucose resistance when overexpressed; DOG1 has a paralog, DOG2, that arose from a single-locus duplication; the last half of DOG1 and DOG2 are subject to gene conversions among <i>S. cerevisiae</i> , <i>S. paradoxus</i> , and <i>S. mikatae</i>                                                                                                                      |
| 1 | YHR047C | AAP1   | Arginine/alanine amino peptidase; overproduction stimulates glycogen accumulation; AAP1 has a paralog, APE2, that arose from the whole genome duplication                                                                                                                                                                                                                                                                                                                                 |



|   |         |       |                                                                                                                                                                                                                                                                                                                                                                                                                               |
|---|---------|-------|-------------------------------------------------------------------------------------------------------------------------------------------------------------------------------------------------------------------------------------------------------------------------------------------------------------------------------------------------------------------------------------------------------------------------------|
| 1 | YHR051W | COX6  | Subunit VI of cytochrome c oxidase (Complex IV); Complex IV is the terminal member of the mitochondrial inner membrane electron transport chain; expression is regulated by oxygen levels                                                                                                                                                                                                                                     |
| 1 | YHR060W | VMA22 | Protein that is required for vacuolar H <sup>+</sup> -ATPase (V-ATPase) function; peripheral membrane protein; not an actual component of the V-ATPase complex; functions in the assembly of the V-ATPase; localized to the yeast endoplasmic reticulum (ER)                                                                                                                                                                  |
| 1 | YHR073W | OSH3  | Member of an oxysterol-binding protein family; this family has seven members in <i>S. cerevisiae</i> ; family members have overlapping, redundant functions in sterol metabolism and collectively perform a function essential for viability; contains FFAT motif; interacts with ER anchor Scs2p at patches at the plasma membrane; regulated by sterol binding                                                              |
| 1 | YHR081W | LRP1  | Nuclear exosome-associated nucleic acid binding protein; involved in RNA processing, surveillance, degradation, tethering, and export; forms a stable heterodimer with Rrp6p and regulates its exonucleolytic activity; rapidly degraded by the proteasome in the absence of Rrp6p; homolog of mammalian nuclear matrix protein C1D involved in regulation of DNA repair and recombination                                    |
| 1 | YHR082C | KSP1  | Serine/threonine protein kinase; associates with TORC1 and likely involved in TOR signaling cascades; negative regulator of autophagy; nuclear translocation required for haploid filamentous growth; regulates filamentous growth induced nuclear translocation of Bcy1p, Fus3p, and Sks1p; overproduction causes allele-specific suppression of prp20-10; protein abundance increases in response to DNA replication stress |
| 1 | YHR092C | HXT4  | High-affinity glucose transporter; member of the major facilitator superfamily, expression is induced by low levels of glucose and repressed by high levels of glucose; HXT4 has a paralog, HXT7, that arose from the whole genome duplication                                                                                                                                                                                |
| 1 | YHR104W | GRE3  | Aldose reductase; involved in methylglyoxal, d-xylose, arabinose, and galactose metabolism; stress induced (osmotic, ionic, oxidative, heat shock, starvation and heavy metals); regulated by the HOG pathway; protein abundance increases in response to DNA replication stress                                                                                                                                              |
| 1 | YHR111W | UBA4  | E1-like protein that activates Urm1p before urmylation; also acts in thiolation of the wobble base of cytoplasmic tRNAs by adenylating and then thiolating Urm1p; receives sulfur from Tum1p                                                                                                                                                                                                                                  |
| 1 | YHR124W | NDT80 | Meiosis-specific transcription factor; required for exit from pachytene and for full meiotic recombination; activates middle sporulation genes; competes with Sum1p for binding to promoters containing middle sporulation elements (MSE)                                                                                                                                                                                     |
| 1 | YHR125W |       | Putative protein of unknown function; conserved across <i>S. cerevisiae</i> strains                                                                                                                                                                                                                                                                                                                                           |
| 1 | YHR134W | WSS1  | SUMO-ligase and SUMO-targeted metalloprotease; involved in DNA repair; removes DNA-protein crosslinks at stalled replication forks during replication of damaged DNA; clears chromatin-bound sumoylated proteins; localizes to single spot on                                                                                                                                                                                 |

|   |         |        |                                                                                                                                                                                                                                                                                                                                                                                                 |
|---|---------|--------|-------------------------------------------------------------------------------------------------------------------------------------------------------------------------------------------------------------------------------------------------------------------------------------------------------------------------------------------------------------------------------------------------|
|   |         |        | nuclear periphery of mother cells but not daughters; exhibits vacuolar localization upon genotoxic stress; activated by DNA binding; member of minigluzincins protease family with mammalian DVC1/Spartan                                                                                                                                                                                       |
| 1 | YHR147C | MRPL6  | Mitochondrial ribosomal protein of the large subunit                                                                                                                                                                                                                                                                                                                                            |
| 1 | YHR151C | MTC6   | Protein of unknown function; mtc6 is synthetically sick with cdc13-1; SWAT-GFP and mCherry fusion proteins localize to the vacuole while SWAT-GFP fusion also localizes to the endoplasmic reticulum                                                                                                                                                                                            |
| 1 | YHR154W | RTT107 | Protein implicated in Mms22-dependent DNA repair during S phase; involved in recruiting the SMC5/6 complex to double-strand breaks; DNA damage induces phosphorylation by Mec1p at one or more SQ/TQ motifs; interacts with Mms22p and Slx4p; has four BRCT domains; has a role in regulation of Ty1 transposition; relative distribution to nuclear foci increases upon DNA replication stress |
| 1 | YHR162W | MPC2   | Highly conserved subunit of the mitochondrial pyruvate carrier (MPC); expressed during growth on fermentable carbon sources, and heterodimerizes with Mpc1p to form the fermentative isoform of MPC; MPC localizes to the mitochondrial inner membrane and mediates pyruvate uptake; MPC2 paralog, MPC3, heterodimerizes with Mpc1p to form the respiratory MPC isoform                         |
| 1 | YHR167W | THP2   | Subunit of the THO and TREX complexes; THO connects transcription elongation and mitotic recombination, and TREX is recruited to activated genes and couples transcription to mRNA export; involved in telomere maintenance                                                                                                                                                                     |
| 1 | YHR181W | SVP26  | Integral membrane protein of the early Golgi apparatus and ER; involved in COP II vesicle transport; may also function to promote retention of proteins in the early Golgi compartment                                                                                                                                                                                                          |
| 1 | YHR183W | GND1   | 6-phosphogluconate dehydrogenase (decarboxylating); catalyzes an NADPH regenerating reaction in the pentose phosphate pathway; required for growth on D-glucono-delta-lactone and adaptation to oxidative stress; GND1 has a paralog, GND2, that arose from the whole genome duplication                                                                                                        |
| 1 | YHR198C | AIM18  | Protein of unknown function; the authentic, non-tagged protein is detected in highly purified mitochondria in high-throughput studies; null mutant displays elevated frequency of mitochondrial genome loss                                                                                                                                                                                     |
| 1 | YIL012W |        | Putative protein of unknown function; conserved across <i>S. cerevisiae</i> strains                                                                                                                                                                                                                                                                                                             |
| 1 | YIL014W | MNT3   | Alpha-1,3-mannosyltransferase; adds the fourth and fifth alpha-1,3-linked mannose residues to O-linked glycans during protein O-glycosylation                                                                                                                                                                                                                                                   |
| 1 | YIL020C | HIS6   | Enzyme that catalyzes the fourth step in the histidine pathway; Phosphoribosylformimino-5-aminoimidazole carboxamide ribotide isomerase; mutations cause histidine auxotrophy and sensitivity to Cu, Co, and Ni salts                                                                                                                                                                           |
| 1 | YIL035C | CKA1   | Alpha catalytic subunit of casein kinase 2 (CK2); a Ser/Thr protein kinase with roles in cell growth and proliferation; CK2, comprised of CKA1, CKA2, CKB1 and CKB2, has many                                                                                                                                                                                                                   |

|   |         |       |                                                                                                                                                                                                                                                                                                                                                                                                                              |
|---|---------|-------|------------------------------------------------------------------------------------------------------------------------------------------------------------------------------------------------------------------------------------------------------------------------------------------------------------------------------------------------------------------------------------------------------------------------------|
|   |         |       | substrates including transcription factors and all RNA polymerases; regulates Fkh1p-mediated donor preference during mating-type switching                                                                                                                                                                                                                                                                                   |
| 1 | YIL043C | CBR1  | Cytochrome b reductase; not essential for viability; also detected in mitochondria; mutation in conserved NADH binding domain of the human ortholog results in type I methemoglobinemia                                                                                                                                                                                                                                      |
| 1 | YIL059C |       | Dubious open reading frame; unlikely to encode a functional protein, based on available experimental and comparative sequence data; partially overlaps the uncharacterized ORF YIL060W                                                                                                                                                                                                                                       |
| 1 | YIL067C |       | Uncharacterized protein of unknown function                                                                                                                                                                                                                                                                                                                                                                                  |
| 1 | YIL090W | ICE2  | Integral ER membrane protein with type-III transmembrane domains; required for maintenance of ER zinc homeostasis; necessary for efficient targeting of Trm1p tRNA methyltransferase to inner nuclear membrane; mutations cause defects in cortical ER morphology in both the mother and daughter cells                                                                                                                      |
| 1 | YIL107C | PFK26 | 6-phosphofructo-2-kinase; inhibited by phosphoenolpyruvate and sn-glycerol 3-phosphate; has negligible fructose-2,6-bisphosphatase activity; transcriptional regulation involves protein kinase A                                                                                                                                                                                                                            |
| 1 | YIL116W | HIS5  | Histidinol-phosphate aminotransferase; catalyzes the seventh step in histidine biosynthesis; responsive to general control of amino acid biosynthesis; mutations cause histidine auxotrophy and sensitivity to Cu, Co, and Ni salts                                                                                                                                                                                          |
| 1 | YIL136W | OM45  | Mitochondrial outer membrane protein of unknown function; major constituent of the outer membrane, extending into the intermembrane space; interacts with porin (Por1p) and with Om14p; imported via the presequence pathway involving the TOM and TIM23 complexes, then assembled in the outer membrane by Mim1p; protein abundance increases in response to DNA replication stress                                         |
| 1 | YIL145C | PAN6  | Pantothenate synthase; also known as pantoate-beta-alanine ligase, required for pantothenic acid biosynthesis, deletion causes pantothenic acid auxotrophy, homologous to E. coli panC                                                                                                                                                                                                                                       |
| 1 | YIL153W | RRD1  | Peptidyl-prolyl cis/trans-isomerase; activator of the phosphotyrosyl phosphatase activity of PP2A; involved in G1 phase progression, microtubule dynamics, bud morphogenesis and DNA repair; required for rapid reduction of Sgs1p levels in response to rapamycin; subunit of the Tap42p-Sit4p-Rrd1p complex; protein increases in abundance and relative distribution to the nucleus increases upon DNA replication stress |
| 1 | YIL154C | IMP2' | Transcriptional activator involved in maintenance of ion homeostasis; also involved in protection against DNA damage caused by bleomycin and other oxidants; contains a C-terminal leucine-rich repeat                                                                                                                                                                                                                       |
| 1 | YIL157C | COA1  | Mitochondrial inner membrane protein; required for assembly of the cytochrome c oxidase complex (complex IV); interacts with complex IV assembly factor Shy1p during the early stages of assembly                                                                                                                                                                                                                            |

|   |         |       |                                                                                                                                                                                                                                                                                                                                                                                                                                                                    |
|---|---------|-------|--------------------------------------------------------------------------------------------------------------------------------------------------------------------------------------------------------------------------------------------------------------------------------------------------------------------------------------------------------------------------------------------------------------------------------------------------------------------|
| 1 | YIL160C | POT1  | 3-ketoacyl-CoA thiolase with broad chain length specificity; cleaves 3-ketoacyl-CoA into acyl-CoA and acetyl-CoA during beta-oxidation of fatty acids                                                                                                                                                                                                                                                                                                              |
| 1 | YIL161W |       | Putative protein of unknown function; green fluorescent protein (GFP)-fusion protein localizes to the cytoplasm; mRNA is enriched in Scp160p-associated mRNPs; YIL161W is a non-essential gene                                                                                                                                                                                                                                                                     |
| 1 | YIL170W | HXT12 | Possible pseudogene in strain S288C; YIL170W/HXT12 and the adjacent ORF, YIL171W, together encode a non-functional member of the hexose transporter family                                                                                                                                                                                                                                                                                                         |
| 1 | YIR032C | DAL3  | Ureidoglycolate lyase; converts ureidoglycolate to glyoxylate and urea in the third step of allantoin degradation; expression is sensitive to nitrogen catabolite repression; this enzyme is sometimes referred to "ureidoglycolate hydrolase" but should not be confused with the Arabidopsis thaliana ureidoglycolate hydrolase enzyme which converts ureidoglycolate to glyoxylate, ammonia and carbon dioxide                                                  |
| 1 | YJL038C | LOH1  | Protein involved in outer spore wall assembly; likely involved directly in dityrosine layer assembly; induced during sporulation; repressed during vegetative growth by Sum1p and Hst1p; sequence similar to adjacent ORF, IRC18/YJL037W, and the irc18 loh1 double mutant exhibits reduced dityrosine fluorescence relative to the single mutants; SWAT-GFP and mCherry fusion proteins localize to the cytosol; proposed role in maintenance of genome integrity |
| 1 | YJL088W | ARG3  | Ornithine carbamoyltransferase; also known as carbamoylphosphate:L-ornithine carbamoyltransferase; catalyzes the biosynthesis of the arginine precursor citrulline                                                                                                                                                                                                                                                                                                 |
| 1 | YJL094C | KHA1  | Putative K <sup>+</sup> /H <sup>+</sup> antiporter; has a probable role in intracellular cation homeostasis; localized to Golgi vesicles and detected in highly purified mitochondria in high-throughput studies                                                                                                                                                                                                                                                   |
| 1 | YJL101C | GSH1  | Gamma glutamylcysteine synthetase; catalyzes the first step in glutathione (GSH) biosynthesis; expression induced by oxidants, cadmium, and mercury; protein abundance increases in response to DNA replication stress                                                                                                                                                                                                                                             |
| 1 | YJL127C | SPT10 | Histone H3 acetylase with a role in transcriptional regulation; sequence-specific activator of histone genes, binds specifically and cooperatively to pairs of UAS elements in core histone promoters, functions at or near TATA box; involved in S phase-specific acetylation of H3K56 at histone promoters, which is required for recruitment of SWI/SNF nucleosome remodeling complex and subsequent transcription                                              |
| 1 | YJL128C | PBS2  | MAP kinase kinase of the HOG signaling pathway; activated under severe osmotic stress; mitophagy-specific regulator; plays a role in regulating Ty1 transposition                                                                                                                                                                                                                                                                                                  |
| 1 | YJL129C | TRK1  | Component of the Trk1p-Trk2p potassium transport system; 180 kDa high affinity potassium transporter; phosphorylated in vivo and interacts physically with the phosphatase Ppz1p, suggesting Trk1p activity is regulated by phosphorylation; TRK1 has a paralog, TRK2, that arose from the whole genome duplication                                                                                                                                                |

|   |         |        |                                                                                                                                                                                                                                                                                                                                                                                             |
|---|---------|--------|---------------------------------------------------------------------------------------------------------------------------------------------------------------------------------------------------------------------------------------------------------------------------------------------------------------------------------------------------------------------------------------------|
| 1 | YJL130C | URA2   | Bifunctional carbamoylphosphate synthetase/aspartate transcarbamylase; catalyzes the first two enzymatic steps in the de novo biosynthesis of pyrimidines; both activities are subject to feedback inhibition by UTP                                                                                                                                                                        |
| 1 | YJL131C | AIM23  | Mitochondrial translation initiation factor 3 (IF3, mIF3); evolutionarily conserved; binds to E. coli ribosomes in vitro; null mutant displays severe respiratory growth defect and elevated frequency of mitochondrial genome loss                                                                                                                                                         |
| 1 | YJL132W |        | Putative protein of unknown function; localizes to the membrane fraction; possible Zap1p-regulated target gene induced by zinc deficiency; YJL132W is a non-essential gene                                                                                                                                                                                                                  |
| 1 | YJL135W |        | Dubious open reading frame; unlikely to encode a functional protein, based on available experimental and comparative sequence data; partially overlaps the verified genes YJL134W/LCB3                                                                                                                                                                                                      |
| 1 | YJL136C | RPS21B | Protein component of the small (40S) ribosomal subunit; homologous to mammalian ribosomal protein S21, no bacterial homolog; RPS21B has a paralog, RPS21A, that arose from the whole genome duplication                                                                                                                                                                                     |
| 1 | YJL140W | RPB4   | RNA polymerase II subunit B32; forms dissociable heterodimer with Rpb7p; Rpb4/7 dissociates from RNAPII as Ser2 CTD phosphorylation increases; Rpb4/7 regulates cellular lifespan via mRNA decay process; involved in recruitment of 3'-end processing factors to transcribing RNAPII complex, export of mRNA to cytoplasm under stress conditions; also involved in translation initiation |
| 1 | YJL142C | IRC9   | Dubious open reading frame; unlikely to encode a functional protein, based on available experimental and comparative sequence data; partially overlaps verified gene YJL141C; null mutant displays increased levels of spontaneous Rad52p foci                                                                                                                                              |
| 1 | YJL146W | IDS2   | Protein involved in modulation of Ime2p activity during meiosis; appears to act indirectly to promote Ime2p-mediated late meiotic functions; found in growing cells and degraded during sporulation                                                                                                                                                                                         |
| 1 | YJL147C | MRX5   | Protein that associates with mitochondrial ribosome; homozygous diploid deletion strain has a sporulation defect characterized by elevated dityrosine in the soluble fraction; expression induced by calcium shortage; YJL147W is a non-essential gene                                                                                                                                      |
| 1 | YJL159W | HSP150 | O-mannosylated heat shock protein; secreted and covalently attached to the cell wall via beta-1,3-glucan and disulfide bridges; required for cell wall stability; induced by heat shock, oxidative stress, and nitrogen limitation; HSP150 has a paralog, PIR3, that arose from the whole genome duplication                                                                                |
| 1 | YJL161W | FMP33  | Putative protein of unknown function; the authentic, non-tagged protein is detected in highly purified mitochondria in high-throughput studies                                                                                                                                                                                                                                              |
| 1 | YJL163C |        | Putative protein of unknown function                                                                                                                                                                                                                                                                                                                                                        |
| 1 | YJL166W | QCR8   | Subunit 8 of ubiquinol cytochrome-c reductase (Complex III); Complex III is a component of the mitochondrial inner membrane electron transport chain; oriented facing the intermembrane space; expression is regulated by Abf1p and Cpf1p                                                                                                                                                   |

|   |         |        |                                                                                                                                                                                                                                                                                                                                                                                                                                                                       |
|---|---------|--------|-----------------------------------------------------------------------------------------------------------------------------------------------------------------------------------------------------------------------------------------------------------------------------------------------------------------------------------------------------------------------------------------------------------------------------------------------------------------------|
| 1 | YJL168C | SET2   | Histone methyltransferase with a role in transcriptional elongation; methylates H3 lysine 36 (H3K36), which suppresses incorporation of acetylated histones and signals for the deacetylation of these histones within transcribed genes; associates with the C-terminal domain(CTD) of Rpo21p; H3K36me3 (trimethylation) requires Spt6p, proline 38 on H3, CTD of Rpo21p, Ctk1p, and C-terminal SRI domain of Ste2p; relocates to the cytosol in response to hypoxia |
| 1 | YJL172W | CPS1   | Vacuolar carboxypeptidase S; expression is induced under low-nitrogen conditions                                                                                                                                                                                                                                                                                                                                                                                      |
| 1 | YJL176C | SWI3   | Subunit of the SWI/SNF chromatin remodeling complex; SWI/SNF regulates transcription by remodeling chromosomes; contains SANT domain that is required for SWI/SNF assembly; is essential for displacement of histone H2A-H2B dimers during ATP-dependent remodeling; required for transcription of many genes, including ADH1, ADH2, GAL1, HO, INO1 and SUC2; relocates to the cytosol under hypoxic conditions                                                       |
| 1 | YJL178C | ATG27  | Type I membrane protein involved in autophagy and the Cvt pathway; may be involved in membrane delivery to the phagophore assembly site                                                                                                                                                                                                                                                                                                                               |
| 1 | YJL179W | PFD1   | Subunit of heterohexameric prefoldin; prefoldin binds cytosolic chaperonin and transfers target proteins to it; involved in the biogenesis of actin and of alpha- and gamma-tubulin; prefoldin complex also localizes to chromatin of actively transcribed genes in the nucleus and facilitates transcriptional elongation                                                                                                                                            |
| 1 | YJL182C |        | Dubious open reading frame; unlikely to encode a functional protein, based on available experimental and comparative sequence data; partially overlaps uncharacterized ORF YJL181W                                                                                                                                                                                                                                                                                    |
| 1 | YJL184W | GON7   | Component of the EKC/KEOPS protein complex; EKC/KEOPS complex is required for t6A tRNA modification and telomeric TG1-3 recombination; may have role in transcription; implicated in osmotic stress response; other complex members are Kae1p, Cgi121p, Pcc1p, and Bud32p                                                                                                                                                                                             |
| 1 | YJL189W | RPL39  | Ribosomal 60S subunit protein L39; required for ribosome biogenesis; loss of both Rpl31p and Rpl39p confers lethality; also exhibits genetic interactions with SIS1 and PAB1; homologous to mammalian ribosomal protein L39, no bacterial homolog                                                                                                                                                                                                                     |
| 1 | YJL191W | RPS14B | Protein component of the small (40S) ribosomal subunit; required for ribosome assembly and 20S pre-rRNA processing; mutations confer cryptopleurine resistance; homologous to mammalian ribosomal protein S14 and bacterial S11; RPS14B has a paralog, RPS14A, that arose from the whole genome duplication                                                                                                                                                           |
| 1 | YJL218W |        | Putative acetyltransferase; similar to bacterial galactoside O-acetyltransferases; induced by oleate in an OAF1/PIP2-dependent manner; promoter contains an oleate response element consensus sequence; non-essential gene                                                                                                                                                                                                                                            |
| 1 | YJR018W |        | Dubious open reading frame; unlikely to encode a functional protein, based on available experimental and comparative sequence data                                                                                                                                                                                                                                                                                                                                    |

|   |         |       |                                                                                                                                                                                                                                                                                                                                                                                                     |
|---|---------|-------|-----------------------------------------------------------------------------------------------------------------------------------------------------------------------------------------------------------------------------------------------------------------------------------------------------------------------------------------------------------------------------------------------------|
| 1 | YJR030C | RBH2  | Putative protein of unknown function; expression repressed in carbon limited vs carbon replete chemostat cultures; non-essential gene; contains a PH-like domain; RBH2 has a paralog, RBH1, that arose from the whole genome duplication                                                                                                                                                            |
| 1 | YJR031C | GEA1  | Guanine nucleotide exchange factor for ADP ribosylation factors (ARFs); involved in vesicular transport between the Golgi and ER, Golgi organization, and actin cytoskeleton organization; GEA1 has a paralog, GEA2, that arose from the whole genome duplication                                                                                                                                   |
| 1 | YJR033C | RAV1  | Subunit of RAVE complex (Rav1p, Rav2p, Skp1p); the RAVE complex promotes assembly of the V-ATPase holoenzyme; required for transport between the early and late endosome/PVC and for localization of TGN membrane proteins; potential Cdc28p substrate                                                                                                                                              |
| 1 | YJR049C | UTR1  | ATP-NADH kinase; phosphorylates both NAD and NADH; active as a hexamer; enhances the activity of ferric reductase (Fre1p); UTR1 has a paralog, YEF1, that arose from the whole genome duplication                                                                                                                                                                                                   |
| 1 | YJR054W | KCH1  | Potassium transporter that mediates K <sup>+</sup> influx; activates high-affinity Ca <sup>2+</sup> influx system (HACS) during mating pheromone response; expression up-regulated in response to alpha factor; localized to sites of polarized growth; member of a fungal-specific gene family; potential Cdc28p substrate; KCH1 has a paralog, PRM6, that arose from the whole genome duplication |
| 1 | YJR055W | HIT1  | Protein involved in C/D snoRNP assembly; regulates abundance of Rsa1p; required for growth at high temperature; similar to human ZNHIT3                                                                                                                                                                                                                                                             |
| 1 | YJR061W |       | Putative protein of unknown function; non-essential gene; transcription repressed by Rm101p; YJR061W has a paralog, MNN4, that arose from the whole genome duplication                                                                                                                                                                                                                              |
| 1 | YJR066W | TOR1  | PIK-related protein kinase and rapamycin target; subunit of TORC1, a complex that controls growth in response to nutrients by regulating translation, transcription, ribosome biogenesis, nutrient transport and autophagy; involved in meiosis; TOR1 has a paralog, TOR2, that arose from the whole genome duplication                                                                             |
| 1 | YJR088C | EMC2  | Member of conserved ER transmembrane complex; required for efficient folding of proteins in the ER; null mutant displays induction of the unfolded protein response; homologous to worm Y57G7A.10/EMC-2, fly CG17556, human TTC35                                                                                                                                                                   |
| 1 | YJR122W | IBA57 | Protein involved in incorporating iron-sulfur clusters into proteins; mitochondrial matrix protein; involved in the incorporation of iron-sulfur clusters into mitochondrial aconitase-type proteins; activates the radical-SAM family members Bio2p and Lip5p; interacts with Ccr4p in the two-hybrid system                                                                                       |
| 1 | YKL003C | MRP17 | Mitochondrial ribosomal protein of the small subunit; MRP17 exhibits genetic interactions with PET122, encoding a COX3-specific translational activator                                                                                                                                                                                                                                             |
| 1 | YKL009W | MRT4  | Protein involved in mRNA turnover and ribosome assembly; required at post-transcriptional step for efficient retrotransposition; localizes to the nucleolus                                                                                                                                                                                                                                         |

|   |         |      |                                                                                                                                                                                                                                                                                                                                       |
|---|---------|------|---------------------------------------------------------------------------------------------------------------------------------------------------------------------------------------------------------------------------------------------------------------------------------------------------------------------------------------|
| 1 | YKL011C | CCE1 | Mitochondrial cruciform cutting endonuclease; cleaves Holliday junctions formed during recombination of mitochondrial DNA; CCE1 has a paralog, MRS1, that arose from the whole genome duplication                                                                                                                                     |
| 1 | YKL026C | GPX1 | Phospholipid hydroperoxide glutathione peroxidase; induced by glucose starvation that protects cells from phospholipid hydroperoxides and nonphospholipid peroxides during oxidative stress; GPX1 has a paralog, HYR1, that arose from the whole genome duplication                                                                   |
| 1 | YKL027W | TCD2 | tRNA threonylcarbamoyladenosine dehydratase; required for the ct6A tRNA base modification, where an adenosine at position 37 is modified to form a cyclized active ester with an oxazolone ring; localized to the mitochondrial outer membrane; TCD2 has a paralog, TCD1, that arose from the whole genome duplication                |
| 1 | YKL038W | RGT1 | Glucose-responsive transcription factor; regulates expression of several glucose transporter (HXT) genes in response to glucose; binds to promoters and acts both as a transcriptional activator and repressor; recruits Tup1p/Cyc8p to target gene promoters; RGT1 has a paralog, EDS1, that arose from the whole genome duplication |
| 1 | YKL044W | MMO1 | Protein of unknown function; SWAT-GFP, seamless-GFP and mCherry fusion proteins localize to the mitochondria; mRNA identified as translated by ribosome profiling data; MMO1 is a non-essential gene                                                                                                                                  |
| 1 | YKL054C | DEF1 | RNAPII degradation factor; forms a complex with Rad26p in chromatin, enables ubiquitination and proteolysis of RNAPII present in an elongation complex; mutant is deficient in Zip1p loading onto chromosomes during meiosis                                                                                                          |
| 1 | YKL070W |      | Putative protein of unknown function; expression induced in cells treated with mycotoxins patulin or citrinin; the authentic, non-tagged protein is detected in highly purified mitochondria in high-throughput studies                                                                                                               |
| 1 | YKL080W | VMA5 | Subunit C of the V1 peripheral membrane domain of V-ATPase; part of the electrogenic proton pump found throughout the endomembrane system; required for the V1 domain to assemble onto the vacuolar membrane; the V1 peripheral membrane domain of vacuolar H <sup>+</sup> -ATPase (V-ATPase) has eight subunits                      |
| 1 | YKL081W | TEF4 | Gamma subunit of translational elongation factor eEF1B; stimulates the binding of aminoacyl-tRNA (AA-tRNA) to ribosomes by releasing eEF1A (Tef1p/Tef2p) from the ribosomal complex                                                                                                                                                   |
| 1 | YKL103C | APE1 | Vacuolar aminopeptidase yscI; zinc metalloproteinase that belongs to the peptidase family M18; often used as a marker protein in studies of autophagy and cytosol to vacuole targeting (CVT) pathway; protein increases in abundance and relative distribution to cytoplasmic foci increases upon DNA replication stress              |
| 1 | YKL109W | HAP4 | Transcription factor; subunit of the heme-activated, glucose-repressed Hap2p/3p/4p/5p CCAAT-binding complex, a transcriptional activator and global regulator of respiratory gene                                                                                                                                                     |



|   |         |        |                                                                                                                                                                                                                                                                                                                                                                                                                                                          |
|---|---------|--------|----------------------------------------------------------------------------------------------------------------------------------------------------------------------------------------------------------------------------------------------------------------------------------------------------------------------------------------------------------------------------------------------------------------------------------------------------------|
|   |         |        | expression; provides the principal activation function of the complex; involved in diauxic shift                                                                                                                                                                                                                                                                                                                                                         |
| 1 | YKL117W | SBA1   | Co-chaperone that binds and regulates Hsp90 family chaperones; plays a role in determining prion variants; important for pp60v-src activity in yeast; homologous to the mammalian p23 proteins, and like p23 can regulate telomerase activity; protein abundance increases in response to DNA replication stress                                                                                                                                         |
| 1 | YKL118W |        | Dubious open reading frame; unlikely to encode a functional protein, based on available experimental and comparative sequence data; partially overlaps the verified gene VPH2                                                                                                                                                                                                                                                                            |
| 1 | YKL120W | OAC1   | Mitochondrial inner membrane transporter; transports oxaloacetate, sulfate, thiosulfate, and isopropylmalate; member of the mitochondrial carrier family                                                                                                                                                                                                                                                                                                 |
| 1 | YKL123W |        | Dubious open reading frame; unlikely to encode a functional protein, based on available experimental and comparative sequence data; partially overlaps the verified gene SSH4                                                                                                                                                                                                                                                                            |
| 1 | YKL124W | SSH4   | Specificity factor required for Rsp5p-dependent ubiquitination; also required for sorting of cargo proteins at the multivesicular body; identified as a high-copy suppressor of a SHR3 deletion, increasing steady-state levels of amino acid permeases                                                                                                                                                                                                  |
| 1 | YKL127W | PGM1   | Phosphoglucomutase, minor isoform; catalyzes the conversion from glucose-1-phosphate to glucose-6-phosphate, which is a key step in hexose metabolism; PGM1 has a paralog, PGM2, that arose from the whole genome duplication                                                                                                                                                                                                                            |
| 1 | YKL130C | SHE2   | RNA-binding protein that binds specific mRNAs and interacts with She3p; part of the mRNA localization machinery that restricts accumulation of certain proteins to the bud; binds to ER-derived membranes and targets mRNAs to cortical ER                                                                                                                                                                                                               |
| 1 | YKL138C | MRPL31 | Mitochondrial ribosomal protein of the large subunit                                                                                                                                                                                                                                                                                                                                                                                                     |
| 1 | YKL139W | CTK1   | Catalytic (alpha) subunit of C-terminal domain kinase I (CTDK-I); phosphorylates both RNA pol II subunit Rpo21p to affect transcription and pre-mRNA 3' end processing, and ribosomal protein Rps2p to increase translational fidelity; required for H3K36 trimethylation but not dimethylation by Set2p; suggested stimulatory role in 80S formation during translation initiation; similar to the Drosophila dCDK12 and human CDK12 and probably CDK13 |
| 1 | YKL142W | MRP8   | Protein of unknown function; undergoes sumoylation; transcription induced under cell wall stress; protein levels are reduced under anaerobic conditions; protein abundance increases in response to DNA replication stress; originally thought to be a mitochondrial ribosomal protein based on sequence analysis                                                                                                                                        |
| 1 | YKL143W | LTV1   | Component of the GSE complex; GSE is required for proper sorting of amino acid permease Gap1p; required for ribosomal small subunit export from nucleus; required for growth at low temperature                                                                                                                                                                                                                                                          |
| 1 | YKL146W | AVT3   | Vacuolar transporter; exports large neutral amino acids from the vacuole; member of a family of seven S. cerevisiae genes (AVT1-7) related to vesicular GABA-glycine transporters                                                                                                                                                                                                                                                                        |

|   |           |        |                                                                                                                                                                                                                                                                                                                                                                                                                                                                                                         |
|---|-----------|--------|---------------------------------------------------------------------------------------------------------------------------------------------------------------------------------------------------------------------------------------------------------------------------------------------------------------------------------------------------------------------------------------------------------------------------------------------------------------------------------------------------------|
| 1 | YKL147C   |        | Dubious open reading frame; unlikely to encode a functional protein, based on available experimental and comparative sequence data; not conserved in closely related <i>Saccharomyces</i> species; partially overlaps the verified gene AVT3                                                                                                                                                                                                                                                            |
| 1 | YKL151C   | NNR2   | Widely-conserved NADHX dehydratase; converts (S)-NADHX to NADH in ATP-dependent manner; YKL151C promoter contains STREs (stress response elements) and expression is induced by heat shock or methyl methanesulfonate; downstream intergenic region drives antisense expression and mediates coordinated regulation of YKL151C and GPM1 phosphoglycerate mutase; protein abundance increases in response to DNA replication stress; homolog of Carkd in mammals and C-terminus of YjeF in <i>E.coli</i> |
| 1 | YKL156W   | RPS27A | Protein component of the small (40S) ribosomal subunit; homologous to mammalian ribosomal protein S27, no bacterial homolog; RPS27A has a paralog, RPS27B, that arose from the whole genome duplication; protein abundance increases in response to DNA replication stress                                                                                                                                                                                                                              |
| 1 | YKL157W   | APE2   | Aminopeptidase yscII; may have a role in obtaining leucine from dipeptide substrates; APE2 has a paralog, AAP1, that arose from the whole genome duplication                                                                                                                                                                                                                                                                                                                                            |
| 1 | YKL162C-A |        | Dubious open reading frame; unlikely to encode a functional protein, based on available experimental and comparative sequence data                                                                                                                                                                                                                                                                                                                                                                      |
| 1 | YKL170W   | MRPL38 | Mitochondrial ribosomal protein of the large subunit; appears as two protein spots (YmL34 and YmL38) on two-dimensional SDS gels; protein abundance increases in response to DNA replication stress                                                                                                                                                                                                                                                                                                     |
| 1 | YKL184W   | SPE1   | Ornithine decarboxylase; catalyzes the first step in polyamine biosynthesis; degraded in a proteasome-dependent manner in the presence of excess polyamines; deletion decreases lifespan, and increases necrotic cell death and ROS generation                                                                                                                                                                                                                                                          |
| 1 | YKL185W   | ASH1   | Component of the Rpd3L histone deacetylase complex; zinc-finger inhibitor of HO transcription; mRNA is localized and translated in the distal tip of anaphase cells, resulting in accumulation of Ash1p in daughter cell nuclei and inhibition of HO expression; potential Cdc28p substrate                                                                                                                                                                                                             |
| 1 | YKL187C   | FAT3   | Protein required for fatty acid uptake; protein abundance increases in cortical patches in response to oleate exposure; the authentic, non-tagged protein is detected in a phosphorylated state in highly purified mitochondria in high-throughput studies; FAT3 has a paralog, YLR413W, that arose from the whole genome duplication                                                                                                                                                                   |
| 1 | YKL194C   | MST1   | Mitochondrial threonyl-tRNA synthetase; aminoacylates both the canonical threonine tRNA tT(UGU)Q1 and the unusual threonine tRNA tT(UAG)Q2 in vitro; lacks a typical editing domain, but has pre-transfer editing activity stimulated by the unusual tRNA-Thr                                                                                                                                                                                                                                           |
| 1 | YKL200C   |        | Merged open reading frame; does not encode a discrete protein; YKL200C was originally annotated as an independent ORF, but as a result of a sequence change, it was merged with an adjacent ORF into a single reading frame, designated YKL201C                                                                                                                                                                                                                                                         |

|   |         |       |                                                                                                                                                                                                                                                                                                                                                                                                                                                                                               |
|---|---------|-------|-----------------------------------------------------------------------------------------------------------------------------------------------------------------------------------------------------------------------------------------------------------------------------------------------------------------------------------------------------------------------------------------------------------------------------------------------------------------------------------------------|
| 1 | YKL201C | MNN4  | Putative positive regulator of mannosylphosphate transferase Mnn6p; involved in mannosylphosphorylation of N-linked oligosaccharides; expression increases in late-logarithmic and stationary growth phases; coding sequence contains length polymorphisms in different strains; MNN4 has a paralog, YJR061W, that arose from the whole genome duplication                                                                                                                                    |
| 1 | YKL205W | LOS1  | Nuclear pore protein; involved in nuclear export of pre-tRNA and in re-export of mature tRNAs after their retrograde import from the cytoplasm; deletion mutation extends replicative lifespan, as does exclusion of Los1p from the nucleus in response to caloric restriction                                                                                                                                                                                                                |
| 1 | YKL216W | URA1  | Dihydroorotate dehydrogenase; catalyzes the fourth enzymatic step in the de novo biosynthesis of pyrimidines, converting dihydroorotic acid into orotic acid                                                                                                                                                                                                                                                                                                                                  |
| 1 | YKL218C | SRY1  | 3-hydroxyaspartate dehydratase; deaminates L-threo-3-hydroxyaspartate to form oxaloacetate and ammonia; required in the presence of hydroxyaspartate; highly similar to mouse serine racemase (Srr) but has no serine racemase activity                                                                                                                                                                                                                                                       |
| 1 | YKR031C | SPO14 | Phospholipase D; catalyzes the hydrolysis of phosphatidylcholine, producing choline and phosphatidic acid; involved in Sec14p-independent secretion; required for meiosis and spore formation; differently regulated in secretion and meiosis; participates in transcription initiation and/or early elongation of specific genes; interacts with "foot domain" of RNA polymerase II; deletion results in abnormal CTD-Ser5 phosphorylation of RNA polymerase II at specific promoter regions |
| 1 | YKR041W |       | Protein of unknown function; localizes to the mitotic spindle; overexpression of YKR041W affects endocytic protein trafficking                                                                                                                                                                                                                                                                                                                                                                |
| 1 | YKR043C | SHB17 | Sedoheptulose biphosphatase involved in riboneogenesis; dephosphorylates sedoheptulose 1,7-bisphosphate, which is converted via the nonoxidative pentose phosphate pathway to ribose-5-phosphate; facilitates the conversion of glycolytic intermediates to pentose phosphate units; also has fructose 1,6-bisphosphatase activity but this is probably not biologically relevant, since deletion does not affect FBP levels; GFP-fusion protein localizes to the cytoplasm and nucleus       |
| 1 | YKR044W | UIP5  | Protein of unknown function that interacts with Ulp1p; a Ubl (ubiquitin-like protein)-specific protease for Smt3p protein conjugates                                                                                                                                                                                                                                                                                                                                                          |
| 1 | YKR045C |       | Putative protein of unknown function; epitope-tagged protein localizes to the cytoplasm                                                                                                                                                                                                                                                                                                                                                                                                       |
| 1 | YKR050W | TRK2  | Component of the Trk1p-Trk2p potassium transport system; contributes to K(+) supply and maintenance of plasma-membrane potential; TRK2 has a paralog, TRK1, that arose from the whole genome duplication                                                                                                                                                                                                                                                                                      |
| 1 | YKR054C | DYN1  | Cytoplasmic heavy chain dynein; microtubule motor protein; member of the AAA+ protein family, required for anaphase spindle elongation; involved in spindle assembly, chromosome movement, and spindle orientation during cell division, targeted to                                                                                                                                                                                                                                          |

|   |         |        |                                                                                                                                                                                                                                                                                                                                                                                                                                                                                            |
|---|---------|--------|--------------------------------------------------------------------------------------------------------------------------------------------------------------------------------------------------------------------------------------------------------------------------------------------------------------------------------------------------------------------------------------------------------------------------------------------------------------------------------------------|
|   |         |        | microtubule tips by Pac1p; motility along microtubules inhibited by She1p                                                                                                                                                                                                                                                                                                                                                                                                                  |
| 1 | YKR057W | RPS21A | Protein component of the small (40S) ribosomal subunit; homologous to mammalian ribosomal protein S21, no bacterial homolog; RPS21A has a paralog, RPS21B, that arose from the whole genome duplication                                                                                                                                                                                                                                                                                    |
| 1 | YKR059W | TIF1   | Translation initiation factor eIF4A; DEA(D/H)-box RNA helicase that couples ATPase activity to RNA binding and unwinding; forms a dumbbell structure of two compact domains connected by a linker; interacts with eIF4G; protein abundance increases in response to DNA replication stress; TIF1 has a paralog, TIF2, that arose from the whole genome duplication                                                                                                                         |
| 1 | YLL005C | SPO75  | Meiosis-specific protein of unknown function; required for spore wall formation during sporulation; dispensable for both nuclear divisions during meiosis                                                                                                                                                                                                                                                                                                                                  |
| 1 | YLL013C | PUF3   | Protein of the mitochondrial outer surface; links the Arp2/3 complex with the mitochore during anterograde mitochondrial movement; also binds to and promotes degradation of mRNAs for select nuclear-encoded mitochondrial proteins                                                                                                                                                                                                                                                       |
| 1 | YLL021W | SPA2   | Component of the polarisome; functions in actin cytoskeletal organization during polarized growth; acts as a scaffold for Mkk1p and Mpk1p cell wall integrity signaling components; potential Cdc28p substrate; coding sequence contains length polymorphisms in different strains; SPA2 has a paralog, SPH1, that arose from the whole genome duplication                                                                                                                                 |
| 1 | YLL043W | FPS1   | Aquaglyceroporin, plasma membrane channel; involved in efflux of glycerol and xylitol, and in uptake of acetic acid, arsenite, and antimonite; key factor in maintaining redox balance by mediating passive diffusion of glycerol; phosphorylated by Hog1p MAPK under acetate stress; deletion improves xylose fermentation; regulated by Rgc1p and Ask10p, which are regulated by Hog1p phosphorylation under osmotic stress; phosphorylation by Ypk1p required to maintain an open state |
| 1 | YLL044W |        | Dubious open reading frame; unlikely to encode a functional protein, based on available experimental and comparative sequence data; transcription of both YLL044W and the overlapping gene RPL8B is reduced in the <i>gcr1</i> null mutant                                                                                                                                                                                                                                                 |
| 1 | YLR024C | UBR2   | Cytoplasmic ubiquitin-protein ligase (E3); component of the Mub1p-Ubr2p-Rad6p ubiquitin ligase complex required for the ubiquitination and degradation of Rpn4p; mediates formation of the ternary complex                                                                                                                                                                                                                                                                                 |
| 1 | YLR027C | AAT2   | Cytosolic aspartate aminotransferase involved in nitrogen metabolism; localizes to peroxisomes in oleate-grown cells                                                                                                                                                                                                                                                                                                                                                                       |
| 1 | YLR048W | RPS0B  | Protein component of the small (40S) ribosomal subunit; RPS0B has a paralog, RPS0A, that arose from the whole genome duplication; required for maturation of 18S rRNA along with Rps0Ap; deletion of either RPS0 gene reduces growth rate, deletion of both genes is lethal; homologous to human ribosomal protein SA and bacterial S2                                                                                                                                                     |

|   |         |       |                                                                                                                                                                                                                                                                                                                                                                                                                                                                                                 |
|---|---------|-------|-------------------------------------------------------------------------------------------------------------------------------------------------------------------------------------------------------------------------------------------------------------------------------------------------------------------------------------------------------------------------------------------------------------------------------------------------------------------------------------------------|
| 1 | YLR064W | PER33 | Protein that localizes to the endoplasmic reticulum; also associates with the nuclear pore complex; deletion extends chronological lifespan; highly conserved across species, orthologous to human TMEM33 and paralogous to Pom33p; protein abundance increases in response to DNA replication stress                                                                                                                                                                                           |
| 1 | YLR068W | FYV7  | Essential protein required for maturation of 18S rRNA; required for survival upon exposure to K1 killer toxin                                                                                                                                                                                                                                                                                                                                                                                   |
| 1 | YLR069C | MEF1  | Mitochondrial elongation factor involved in translational elongation                                                                                                                                                                                                                                                                                                                                                                                                                            |
| 1 | YLR074C | BUD20 | C2H2-type zinc finger protein required for ribosome assembly; shuttling factor which associates with pre-60S particles in the nucleus, accompanying them to the cytoplasm; cytoplasmic dissociation of Bud20p requires Drg1p; N-terminus harbors a nuclear localization signal (NLS) and a nuclear export signal (NES); cytoplasmic Bud20p is reimported by Kap123-dependent pathway; involved in bud-site selection; diploid mutants display a random budding pattern; similar to human ZNF593 |
| 1 | YLR083C | EMP70 | Protein with a role in cellular adhesion and filamentous growth; also endosome-to-vacuole sorting; similar to Tmn3p; member of Transmembrane Nine family of proteins with 9 transmembrane segments; EMP70 has a paralog, TMN2, that arose from the whole genome duplication                                                                                                                                                                                                                     |
| 1 | YLR099C | ICT1  | Lysophosphatidic acid acyltransferase; responsible for enhanced phospholipid synthesis during organic solvent stress; null displays increased sensitivity to Calcofluor white; highly expressed during organic solvent stress; ICT1 has a paralog, ECM18, that arose from the whole genome duplication; human ABHD5 can complement ict1 null mutant                                                                                                                                             |
| 1 | YLR108C |       | Protein of unknown function; green fluorescent protein (GFP)-fusion protein localizes to the nucleus; YLR108C is not an essential gene; protein abundance increases in response to DNA replication stress; YLR108C has a paralog, YDR132C, that arose from the whole genome duplication                                                                                                                                                                                                         |
| 1 | YLR109W | AHP1  | Thiol-specific peroxiredoxin; reduces hydroperoxides to protect against oxidative damage; function in vivo requires covalent conjugation to Urm1p                                                                                                                                                                                                                                                                                                                                               |
| 1 | YLR110C | CCW12 | Cell wall mannoprotein; plays a role in maintenance of newly synthesized areas of cell wall; localizes to periphery of small buds, septum region of larger buds, and shmoo tip; CCW12 has a paralog, YDR134C, that arose from the whole genome duplication                                                                                                                                                                                                                                      |
| 1 | YLR111W |       | Putative protein of unknown function; conserved across <i>S. cerevisiae</i> strains                                                                                                                                                                                                                                                                                                                                                                                                             |
| 1 | YLR118C |       | Acyl-protein thioesterase responsible for depalmitoylation of Gpa1p; green fluorescent protein (GFP)-fusion protein localizes to both the cytoplasm and nucleus and is induced in response to the DNA-damaging agent MMS                                                                                                                                                                                                                                                                        |
| 1 | YLR139C | SLS1  | Mitochondrial membrane protein; coordinates expression of mitochondrially-encoded genes; may facilitate delivery of mRNA to membrane-bound translation machinery                                                                                                                                                                                                                                                                                                                                |

|   |         |       |                                                                                                                                                                                                                                                                                                                                                                                 |
|---|---------|-------|---------------------------------------------------------------------------------------------------------------------------------------------------------------------------------------------------------------------------------------------------------------------------------------------------------------------------------------------------------------------------------|
| 1 | YLR184W |       | Dubious open reading frame; unlikely to encode a functional protein, based on available experimental and comparative sequence data                                                                                                                                                                                                                                              |
| 1 | YLR187W | SKG3  | Protein of unknown function; green fluorescent protein (GFP)-fusion protein localizes to the cell periphery, cytoplasm, bud, and bud neck; potential Cdc28p substrate; similar to Skg4p; relocalizes from bud neck to cytoplasm upon DNA replication stress; SKG3 has a paralog, CAF120, that arose from the whole genome duplication                                           |
| 1 | YLR201C | COQ9  | Protein required for ubiquinone biosynthesis and respiratory growth; localizes to matrix face of mitochondrial inner membrane in a large complex with ubiquinone biosynthetic enzymes; ubiquinone is also known as coenzyme Q; human homolog COQ9 can complement yeast coq9 null mutant                                                                                         |
| 1 | YLR205C | HMX1  | ER localized heme oxygenase; involved in heme degradation during iron starvation and in the oxidative stress response; expression is regulated by AFT1 and oxidative stress; relocates to the perinuclear region in the presence of oxidants                                                                                                                                    |
| 1 | YLR214W | FRE1  | Ferric reductase and cupric reductase; reduces siderophore-bound iron and oxidized copper prior to uptake by transporters; expression induced by low copper and iron levels                                                                                                                                                                                                     |
| 1 | YLR217W |       | Dubious open reading frame; unlikely to encode a functional protein, based on available experimental and comparative sequence data; partially overlaps the verified gene CPR6                                                                                                                                                                                                   |
| 1 | YLR226W | BUR2  | Cyclin for the Sgv1p (Bur1p) protein kinase; Sgv1p and Bur2p comprise the CDK-cyclin BUR kinase complex which is involved in transcriptional regulation through its phosphorylation of the carboxy-terminal domain (CTD) of the largest subunit of RNA polymerase II (Rpo21p); BUR kinase is also involved in the recruitment of Spt6p to the CTD at the onset of transcription |
| 1 | YLR234W | TOP3  | DNA Topoisomerase III; conserved protein that functions in a complex with Sgs1p and Rmi1p to relax single-stranded negatively-supercoiled DNA preferentially; DNA catenation/decatenation activity is stimulated by RPA and Sgs1p-Top3p-Rmi1p; involved in telomere stability and regulation of mitotic recombination                                                           |
| 1 | YLR236C |       | Putative protein of unknown function; conserved across <i>S. cerevisiae</i> strains; overlaps ORF YLR235C                                                                                                                                                                                                                                                                       |
| 1 | YLR239C | LIP2  | Lipoyl ligase; involved in the modification of mitochondrial enzymes by the attachment of lipoic acid groups                                                                                                                                                                                                                                                                    |
| 1 | YLR254C | NDL1  | Homolog of nuclear distribution factor NudE; NUDEL; interacts with Pac1p and regulates dynein targeting to microtubule plus ends                                                                                                                                                                                                                                                |
| 1 | YLR261C | VPS63 | Putative protein of unknown function; not conserved in closely related <i>Saccharomyces</i> species; 98% of ORF overlaps the verified gene YPT6; deletion causes a vacuolar protein sorting defect; decreased levels of protein in enolase deficient mutant                                                                                                                     |
| 1 | YLR352W |       | Putative protein of unknown function with similarity to F-box proteins; interacts with Skp1p and Cdc53p; YLR352W is not an essential gene                                                                                                                                                                                                                                       |

|   |         |       |                                                                                                                                                                                                                                                                                                                      |
|---|---------|-------|----------------------------------------------------------------------------------------------------------------------------------------------------------------------------------------------------------------------------------------------------------------------------------------------------------------------|
| 1 | YLR356W | ATG33 | Mitochondrial mitophagy-specific protein; required primarily for mitophagy induced at post-log phase; not required for other types of selective autophagy or macroautophagy; conserved within fungi, but not in higher eukaryotes; ATG33 has a paralog, SCM4, that arose from the whole genome duplication           |
| 1 | YLR357W | RSC2  | Component of the RSC chromatin remodeling complex; required for expression of mid-late sporulation-specific genes; involved in telomere maintenance; RSC2 has a paralog, RSC1, that arose from the whole genome duplication                                                                                          |
| 1 | YLR360W | VPS38 | Part of a Vps34p phosphatidylinositol 3-kinase complex; functions in carboxypeptidase Y (CPY) sorting; binds Vps30p and Vps34p to promote production of phosphatidylinositol 3-phosphate (PtdIns3P) which stimulates kinase activity; required for overflow degradation of misfolded proteins when ERAD is saturated |
| 1 | YLR364W | GRX8  | Glutaredoxin that employs a dithiol mechanism of catalysis; monomeric; activity is low and null mutation does not affect sensitivity to oxidative stress; GFP-fusion protein localizes to the cytoplasm; expression strongly induced by arsenic                                                                      |
| 1 | YLR369W | SSQ1  | Mitochondrial hsp70-type molecular chaperone; required for assembly of iron/sulfur clusters into proteins at a step after cluster synthesis, and for maturation of Yfh1p, which is a homolog of human frataxin implicated in Friedreich's ataxia                                                                     |
| 1 | YLR370C | ARC18 | Subunit of the ARP2/3 complex; ARP2/3 is required for the motility and integrity of cortical actin patches                                                                                                                                                                                                           |
| 1 | YLR371W | ROM2  | Guanine nucleotide exchange factor (GEF) for Rho1p and Rho2p; mutations are synthetically lethal with mutations in rom1, which also encodes a GEF; Rom2p localization to the bud surface is dependent on Ack1p; ROM2 has a paralog, ROM1, that arose from the whole genome duplication                               |
| 1 | YLR377C | FBP1  | Fructose-1,6-bisphosphatase; key regulatory enzyme in the gluconeogenesis pathway, required for glucose metabolism; undergoes either proteasome-mediated or autophagy-mediated degradation depending on growth conditions; glucose starvation results in redistribution to the periplasm; interacts with Vid30p      |
| 1 | YLR381W | CTF3  | Outer kinetochore protein that forms a complex with Mcm16p and Mcm22p; may bind the kinetochore to spindle microtubules; required for the spindle assembly checkpoint; orthologous to human centromere constitutive-associated network (CCAN) subunit CENP-I and fission yeast mis6                                  |
| 1 | YLR382C | NAM2  | Mitochondrial leucyl-tRNA synthetase; also has direct role in splicing of several mitochondrial group I introns; indirectly required for mitochondrial genome maintenance; human homolog LARS2 can complement yeast null mutant, and is implicated in Perrault syndrome                                              |
| 1 | YLR387C | REH1  | Cytoplasmic 60S subunit biogenesis factor; associates with pre-60S particles; similar to Rei1p and shares partially redundant function in cytoplasmic 60S subunit maturation; contains dispersed C2H2 zinc finger domains                                                                                            |

|   |         |       |                                                                                                                                                                                                                                                                                                                                                                                                                                                                                               |
|---|---------|-------|-----------------------------------------------------------------------------------------------------------------------------------------------------------------------------------------------------------------------------------------------------------------------------------------------------------------------------------------------------------------------------------------------------------------------------------------------------------------------------------------------|
| 1 | YLR395C | COX8  | Subunit VIII of cytochrome c oxidase (Complex IV); Complex IV is the terminal member of the mitochondrial inner membrane electron transport chain                                                                                                                                                                                                                                                                                                                                             |
| 1 | YLR399C | BDF1  | Protein involved in transcription initiation; functions at TATA-containing promoters; associates with the basal transcription factor TFIID; contains two bromodomains; corresponds to the C-terminal region of mammalian TAF1; redundant with Bdf2p; BDF1 has a paralog, BDF2, that arose from the whole genome duplication                                                                                                                                                                   |
| 1 | YLR404W | SEI1  | Seipin involved in lipid droplet (LD) assembly; controls lipid particle morphology, number, and size; promotes initiation of LD formation on the ER; ensures that LDs bud from the ER towards the cytosolic side of the membrane; forms a complex with Ldb16p at ER-LD contact sites, stabilizing these sites; null mutants have localized accumulation of phosphatidic acid (PA) marker proteins; BSCL2, human homolog implicated in congenital lipodystrophy, complements yeast null mutant |
| 1 | YLR412W | BER1  | Protein involved in microtubule-related processes; GFP-fusion protein localizes to the cytoplasm and is induced in response to the DNA-damaging agent MMS; YLR412W is not an essential gene; similar to Arabidopsis SRR1 gene                                                                                                                                                                                                                                                                 |
| 1 | YLR413W | INA1  | Protein of unknown function; not an essential gene; YLR413W has a paralog, FAT3, that arose from the whole genome duplication                                                                                                                                                                                                                                                                                                                                                                 |
| 1 | YLR417W | VPS36 | Component of the ESCRT-II complex; contains the GLUE (GRAM Like Ubiquitin binding in EAP45) domain which is involved in interactions with ESCRT-I and ubiquitin-dependent sorting of proteins into the endosome; plays a role in the formation of mutant huntingtin (Htt) aggregates in yeast                                                                                                                                                                                                 |
| 1 | YLR436C | ECM30 | Protein of unknown function; may play a role in cell wall biosynthesis, mutants have abnormal relative levels of mannose and glucose and have Gap1p sorting and transport defects; (GFP)-fusion protein localizes to the cytoplasm                                                                                                                                                                                                                                                            |
| 1 | YLR438W | CAR2  | L-ornithine transaminase (OTase); catalyzes the second step of arginine degradation, expression is dually-regulated by allophanate induction and a specific arginine induction process; not nitrogen catabolite repression sensitive; protein abundance increases in response to DNA replication stress; human homolog OAT complements yeast null mutant                                                                                                                                      |
| 1 | YLR447C | VMA6  | Subunit d of the V0 integral membrane domain of V-ATPase; part of the electrogenic proton pump found in the endomembrane system; required for V1 domain assembly on the vacuolar membrane; the V0 integral membrane domain of vacuolar H <sup>+</sup> -ATPase (V-ATPase) has five subunits                                                                                                                                                                                                    |
| 1 | YLR454W | FMP27 | Putative protein of unknown function; the authentic, non-tagged protein is detected in highly purified mitochondria in high-throughput studies                                                                                                                                                                                                                                                                                                                                                |
| 1 | YLR460C |       | Member of the quinone oxidoreductase family; up-regulated in response to the fungicide mancozeb; possibly up-regulated by iodine                                                                                                                                                                                                                                                                                                                                                              |



|   |           |        |                                                                                                                                                                                                                                                                                                                                                                                                                                                                                                 |
|---|-----------|--------|-------------------------------------------------------------------------------------------------------------------------------------------------------------------------------------------------------------------------------------------------------------------------------------------------------------------------------------------------------------------------------------------------------------------------------------------------------------------------------------------------|
| 1 | YLR461W   | PAU4   | Member of the seripauperin multigene family; encoded mainly in subtelomeric regions; SWAT-GFP fusion protein localizes to the endoplasmic reticulum and vacuole, while mCherry fusion localizes to just the vacuole; active during alcoholic fermentation; regulated by anaerobiosis; negatively regulated by oxygen; repressed by heme                                                                                                                                                         |
| 1 | YML001W   | YPT7   | Rab family GTPase; GTP-binding protein of the rab family; required for homotypic fusion event in vacuole inheritance, for endosome-endosome fusion; localizes to sites of contact between the vacuole and mitochondria (vCLAMPs); interacts with the cargo selection/retromer complex for retrograde sorting; similar to mammalian Rab7                                                                                                                                                         |
| 1 | YML002W   |        | Putative protein of unknown function; expression induced by heat and by calcium shortage                                                                                                                                                                                                                                                                                                                                                                                                        |
| 1 | YML009C   | MRPL39 | Mitochondrial ribosomal protein of the large subunit                                                                                                                                                                                                                                                                                                                                                                                                                                            |
| 1 | YML012C-A |        | Dubious open reading frame; unlikely to encode a functional protein, based on available experimental and comparative sequence data; partially overlaps the verified gene SEL1                                                                                                                                                                                                                                                                                                                   |
| 1 | YML014W   | TRM9   | tRNA methyltransferase; catalyzes modification of wobble bases in tRNA anticodons to 2, 5-methoxycarbonylmethyluridine and 5-methoxycarbonylmethyl-2-thiouridine; may act as part of a complex with Trm112p; deletion mutation increases translational infidelity, including amino acid misincorporation and -1 frameshifting, and also confers resistance to zymocin; null mutant displays activation of stress responses                                                                      |
| 1 | YML041C   | VPS71  | Nucleosome-binding component of the SWR1 complex; SWR1 exchanges histone variant H2AZ (Htz1p) for chromatin-bound histone H2A; required for vacuolar protein sorting                                                                                                                                                                                                                                                                                                                            |
| 1 | YML061C   | PIF1   | DNA helicase, potent G-quadruplex DNA binder/unwinder; possesses strand annealing activity; promotes DNA synthesis during break-induced replication; important for crossover recombination; translation from different start sites produces mitochondrial and nuclear forms; nuclear form is a catalytic inhibitor of telomerase; mitochondrial form involved in DNA repair and recombination; mutations affect Zn, Fe homeostasis; regulated by Rad53p-dependent phosphorylation in rho0 cells |
| 1 | YML075C   | HMG1   | HMG-CoA reductase; catalyzes conversion of HMG-CoA to mevalonate, which is a rate-limiting step in sterol biosynthesis; one of two isozymes; localizes to nuclear envelope; overproduction induces formation of karmellae; forms foci at nuclear periphery upon DNA replication stress; HMG1 has a paralog, HMG2, that arose from the whole genome duplication; human homolog HMGCR can complement yeast hmg1 mutant                                                                            |
| 1 | YML080W   | DUS1   | Dihydrouridine synthase; member of a widespread family of conserved proteins including Smm1p, Dus3p, and Dus4p; modifies pre-tRNA(Phe) at U17                                                                                                                                                                                                                                                                                                                                                   |
| 1 | YML081W   | TDA9   | Transcription factor that regulates acetate production; green fluorescent protein (GFP)-fusion protein localizes to the nucleus; null mutant is sensitive to expression of the top1-T722A allele; not                                                                                                                                                                                                                                                                                           |

|   |           |       |                                                                                                                                                                                                                                                                                                                                                                                                                                           |
|---|-----------|-------|-------------------------------------------------------------------------------------------------------------------------------------------------------------------------------------------------------------------------------------------------------------------------------------------------------------------------------------------------------------------------------------------------------------------------------------------|
|   |           |       | an essential gene; TDA9 has a paralog, RSF2, that arose from the whole genome duplication                                                                                                                                                                                                                                                                                                                                                 |
| 1 | YML082W   |       | Putative protein predicted to have carbon-sulfur lyase activity; transcriptionally regulated by Upc2p via an upstream sterol response element; green fluorescent protein (GFP)-fusion protein localizes to the nucleus and the cytoplasm; not an essential gene; YML082W has a paralog, STR2, that arose from the whole genome duplication                                                                                                |
| 1 | YML086C   | ALO1  | D-Arabinono-1,4-lactone oxidase; catalyzes the final step in biosynthesis of dehydro-D-arabinono-1,4-lactone, which is protective against oxidative stress                                                                                                                                                                                                                                                                                |
| 1 | YML087C   | AIM33 | Protein of unknown function, highly conserved across species; homolog of human CYB5R4; null mutant displays reduced frequency of mitochondrial genome loss; AIM33 has a paralog, PGA3, that arose from the whole genome duplication                                                                                                                                                                                                       |
| 1 | YML089C   |       | Dubious open reading frame; unlikely to encode a functional protein, based on available experimental and comparative sequence data; expression induced by calcium shortage                                                                                                                                                                                                                                                                |
| 1 | YMR016C   | SOK2  | Nuclear protein that negatively regulates pseudohyphal differentiation; plays a regulatory role in the cyclic AMP (cAMP)-dependent protein kinase (PKA) signal transduction pathway; relocalizes to the cytosol in response to hypoxia; SOK2 has a paralog, PHD1, that arose from the whole genome duplication                                                                                                                            |
| 1 | YMR031W-A |       | Dubious open reading frame; unlikely to encode a functional protein, based on available experimental and comparative sequence data; null mutant displays shortened telomeres; partially overlaps the uncharacterized ORF YMR031C                                                                                                                                                                                                          |
| 1 | YMR032W   | HOF1  | Protein that regulates actin cytoskeleton organization; required for cytokinesis, actin cable organization, and secretory vesicle trafficking; localized to bud neck; phosphorylated by Dbf2p; regulates actomyosin ring dynamics and septin localization; contains an SH3 domain; N terminus controls cell size and levels of actin cables, while C terminus controls actin cable organization via direct regulation of the formin Bnr1p |
| 1 | YMR052C-A |       | Dubious open reading frame; unlikely to encode a functional protein, based on available experimental and comparative sequence data                                                                                                                                                                                                                                                                                                        |
| 1 | YMR062C   | ARG7  | Mitochondrial ornithine acetyltransferase; catalyzes the fifth step in arginine biosynthesis; also possesses acetylglutamate synthase activity, regenerates acetylglutamate while forming ornithine                                                                                                                                                                                                                                       |
| 1 | YMR072W   | ABF2  | Mitochondrial DNA-binding protein; involved in mitochondrial DNA replication and recombination, member of HMG1 DNA-binding protein family; activity may be regulated by protein kinase A phosphorylation; ABF2 has a paralog, IXR1, that arose from the whole genome duplication; human homolog TFAM can complement yeast abf2 mutant, rescuing the loss-of-mitochondrial DNA phenotype in a yeast abf2 strain                            |
| 1 | YMR073C   | IRC21 | Protein of unknown function; may be involved in resistance to carboplatin and cisplatin; null mutant displays increase in                                                                                                                                                                                                                                                                                                                 |

|   |           |        |                                                                                                                                                                                                                                                                                                                                                                                                        |
|---|-----------|--------|--------------------------------------------------------------------------------------------------------------------------------------------------------------------------------------------------------------------------------------------------------------------------------------------------------------------------------------------------------------------------------------------------------|
|   |           |        | spontaneous Rad52p foci; contains a lipid-binding domain and binds cardiolipin in a large-scale study                                                                                                                                                                                                                                                                                                  |
| 1 | YMR077C   | VPS20  | Myristoylated subunit of the ESCRT-III complex; the endosomal sorting complex required for transport of transmembrane proteins into the multivesicular body pathway to the lysosomal/vacuolar lumen; cytoplasmic protein recruited to endosomal membranes                                                                                                                                              |
| 1 | YMR082C   |        | Putative protein of unknown function; conserved among <i>S. cerevisiae</i> strains; YMR082C is not an essential gene                                                                                                                                                                                                                                                                                   |
| 1 | YMR086C-A |        | Dubious open reading frame; unlikely to encode a functional protein, based on available experimental and comparative sequence data                                                                                                                                                                                                                                                                     |
| 1 | YMR091C   | NPL6   | Component of the RSC chromatin remodeling complex; interacts with Rsc3p, Rsc30p, Ldb7p, and Htl1p to form a module important for a broad range of RSC functions                                                                                                                                                                                                                                        |
| 1 | YMR142C   | RPL13B | Ribosomal 60S subunit protein L13B; not essential for viability; homologous to mammalian ribosomal protein L13, no bacterial homolog; RPL13B has a paralog, RPL13A, that arose from the whole genome duplication                                                                                                                                                                                       |
| 1 | YMR155W   |        | Putative protein of unknown function; identified as interacting with Hsp82p in a high-throughput two-hybrid screen                                                                                                                                                                                                                                                                                     |
| 1 | YMR169C   | ALD3   | Cytoplasmic aldehyde dehydrogenase; involved in beta-alanine synthesis; uses NAD <sup>+</sup> as the preferred coenzyme; very similar to Ald2p; expression is induced by stress and repressed by glucose                                                                                                                                                                                               |
| 1 | YMR179W   | SPT21  | Protein with a role in transcriptional silencing; required for normal transcription at several loci including HTA2-HTB2 and HHF2-HHT2, but not required at the other histone loci; functionally related to Spt10p; localizes to nuclear foci that become diffuse upon DNA replication stress                                                                                                           |
| 1 | YMR184W   | ADD37  | Protein of unknown function; involved in ER-associated protein degradation; green fluorescent protein (GFP)-fusion protein localizes to the cytoplasm and is induced in response to the DNA-damaging agent MMS; YMR184W is not an essential gene; protein abundance increases in response to DNA replication stress                                                                                    |
| 1 | YMR230W   | RPS10B | Protein component of the small (40S) ribosomal subunit; homologous to mammalian ribosomal protein S10, no bacterial homolog; RPS10B has a paralog, RPS10A, that arose from the whole genome duplication; mutations in the human homolog associated with Diamond-Blackfan anemia                                                                                                                        |
| 1 | YMR232W   | FUS2   | Cell fusion regulator; cytoplasmic protein localized to shmoo tip; required for alignment of parental nuclei before nuclear fusion during mating; contains a Dbl-homology domain; binds specifically with activated Cdc42p                                                                                                                                                                             |
| 1 | YMR243C   | ZRC1   | Vacuolar membrane zinc transporter; transports zinc from cytosol to vacuole for storage; also has role in resistance to zinc shock resulting from sudden influx of zinc into cytoplasm; human ortholog SLC30A10 functions as a Mn transporter and mutations in SLC30A10 cause neurotoxic accumulation of Mn in liver and brain; ZRC1 has a paralog, COT1, that arose from the whole genome duplication |

|   |           |        |                                                                                                                                                                                                                                                                                                                                                                                                                                                                               |
|---|-----------|--------|-------------------------------------------------------------------------------------------------------------------------------------------------------------------------------------------------------------------------------------------------------------------------------------------------------------------------------------------------------------------------------------------------------------------------------------------------------------------------------|
| 1 | YMR244C-A | COA6   | Protein involved in cytochrome c oxidase (Complex IV) assembly; involved in delivery of copper to Complex IV; also required for efficient formation of respiratory supercomplexes comprised of Complexes III and IV; localizes to the mitochondrial intermembrane space; ortholog implicated in cardiac defects in zebrafish and human; transcription is induced in response to the DNA-damaging agent MMS; protein abundance increases in response to DNA replication stress |
| 1 | YMR252C   |        | Putative protein of unknown function; green fluorescent protein (GFP)-fusion protein localizes to mitochondria; YMR252C is not an essential gene                                                                                                                                                                                                                                                                                                                              |
| 1 | YMR253C   |        | Putative protein of unknown function; green fluorescent protein (GFP)-fusion protein localizes to the cytoplasm in a punctate pattern; YMR253C is not an essential gene                                                                                                                                                                                                                                                                                                       |
| 1 | YMR254C   |        | Putative protein of unknown function; conserved across <i>S. cerevisiae</i> strains                                                                                                                                                                                                                                                                                                                                                                                           |
| 1 | YMR257C   | PET111 | Mitochondrial translational activator specific for the COX2 mRNA; located in the mitochondrial inner membrane                                                                                                                                                                                                                                                                                                                                                                 |
| 1 | YMR264W   | CUE1   | Ubiquitin-binding protein; ER membrane protein that recruits and integrates the ubiquitin-conjugating enzyme Ubc7p into ER membrane-bound ubiquitin ligase complexes that function in the ER-associated degradation (ERAD) pathway for misfolded proteins; contains a CUE domain that binds ubiquitin to facilitate intramolecular monoubiquitination and to promote diubiquitin elongation, facilitating polyubiquitin chain formation                                       |
| 1 | YMR271C   | URA10  | Minor orotate phosphoribosyltransferase (OPRTase) isozyme; catalyzes the fifth enzymatic step in the de novo biosynthesis of pyrimidines, converting orotate into orotidine-5'-phosphate; URA10 has a paralog, URA5, that arose from the whole genome duplication                                                                                                                                                                                                             |
| 1 | YMR282C   | AEP2   | Mitochondrial protein; likely involved in translation of the mitochondrial OLI1 mRNA; exhibits genetic interaction with the OLI1 mRNA 5'-untranslated leader                                                                                                                                                                                                                                                                                                                  |
| 1 | YMR286W   | MRPL33 | Mitochondrial ribosomal protein of the large subunit                                                                                                                                                                                                                                                                                                                                                                                                                          |
| 1 | YNL052W   | COX5A  | Subunit Va of cytochrome c oxidase; cytochrome c oxidase is the terminal member of the mitochondrial inner membrane electron transport chain; Cox5Ap is predominantly expressed during aerobic growth while its isoform Vb (Cox5Bp) is expressed during anaerobic growth; COX5A has a paralog, COX5B, that arose from the whole genome duplication                                                                                                                            |
| 1 | YNL057W   |        | Dubious open reading frame; unlikely to encode a functional protein, based on available experimental and comparative sequence data                                                                                                                                                                                                                                                                                                                                            |
| 1 | YNL066W   | SUN4   | Cell wall protein related to glucanases; possibly involved in cell wall septation; member of the SUN family; SUN4 has a paralog, SIM1, that arose from the whole genome duplication                                                                                                                                                                                                                                                                                           |
| 1 | YNL080C   | EOS1   | Protein involved in N-glycosylation; deletion mutation confers sensitivity to oxidative stress and shows synthetic lethality with mutations in the spindle checkpoint genes BUB3 and MAD1; YNL080C is not an essential gene                                                                                                                                                                                                                                                   |

|   |         |       |                                                                                                                                                                                                                                                                                                                                                                                                    |
|---|---------|-------|----------------------------------------------------------------------------------------------------------------------------------------------------------------------------------------------------------------------------------------------------------------------------------------------------------------------------------------------------------------------------------------------------|
| 1 | YNL085W | MKT1  | Protein similar to nucleases that forms a complex with Pbp1p; complex may mediate posttranscriptional regulation of HO; involved in propagation of M2 dsRNA satellite of L-A virus; allelic variation affects mitochondrial genome stability, drug resistance, and more; forms cytoplasmic foci upon DNA replication stress; localization to P-bodies under ethanol stress differs between strains |
| 1 | YNL086W | SNN1  | Subunit of the BLOC-1 complex involved in endosomal maturation; interacts with Msb3p; green fluorescent protein (GFP)-fusion protein localizes to endosomes                                                                                                                                                                                                                                        |
| 1 | YNL096C | RPS7B | Protein component of the small (40S) ribosomal subunit; interacts with Kti11p; deletion causes hypersensitivity to zymocin; homologous to mammalian ribosomal protein S7, no bacterial homolog; RPS7B has a paralog, RPS7A, that arose from the whole genome duplication; protein abundance increases in response to DNA replication stress                                                        |
| 1 | YNL097C | PHO23 | Component of the Rpd3L histone deacetylase complex; involved in transcriptional regulation of PHO5; affects termination of snoRNAs and cryptic unstable transcripts (CUTs); C-terminus shares significant sequence identity with the human candidate tumor suppressor p33-ING1 and its isoform ING3                                                                                                |
| 1 | YNL117W | MLS1  | Malate synthase, enzyme of the glyoxylate cycle; involved in utilization of non-fermentable carbon sources; expression is subject to carbon catabolite repression; localizes in peroxisomes during growth on oleic acid, otherwise cytosolic; can accept butyryl-CoA as acyl-CoA donor in addition to traditional substrate acetyl-CoA                                                             |
| 1 | YNL133C | FYV6  | Protein of unknown function; required for survival upon exposure to K1 killer toxin; proposed to regulate double-strand break repair via non-homologous end-joining                                                                                                                                                                                                                                |
| 1 | YNL144C |       | Putative protein of unknown function; non-tagged protein is detected in highly purified mitochondria in high-throughput studies; contains a PH domain and binds phosphatidylinositols and phosphatidylethanolamine in a large-scale study; YNL144C has a paralog, YHR131C, that arose from the whole genome duplication                                                                            |
| 1 | YNL145W | MFA2  | Mating pheromone a-factor; made by a cells; interacts with alpha cells to induce cell cycle arrest and other responses leading to mating; biogenesis involves C-terminal modification, N-terminal proteolysis, and export; also encoded by MFA1                                                                                                                                                    |
| 1 | YNL160W | YGP1  | Cell wall-related secretory glycoprotein; induced by nutrient deprivation-associated growth arrest and upon entry into stationary phase; may be involved in adaptation prior to stationary phase entry; YGP1 has a paralog, SPS100, that arose from the whole genome duplication                                                                                                                   |
| 1 | YNL176C | TDA7  | Cell cycle-regulated gene of unknown function; promoter bound by Fkh2p; null mutant is sensitive to expression of the top1-T722A allele; TDA7 has a paralog, YDL211C, that arose from the whole genome duplication                                                                                                                                                                                 |
| 1 | YNL179C |       | Dubious open reading frame; unlikely to encode a functional protein, based on available experimental and comparative                                                                                                                                                                                                                                                                               |

|   |         |       |                                                                                                                                                                                                                                                                                                                                                                                                                                                                                         |
|---|---------|-------|-----------------------------------------------------------------------------------------------------------------------------------------------------------------------------------------------------------------------------------------------------------------------------------------------------------------------------------------------------------------------------------------------------------------------------------------------------------------------------------------|
|   |         |       | sequence data; not conserved in closely related <i>Saccharomyces</i> species; deletion in <i>cyr1</i> mutant results in loss of stress resistance                                                                                                                                                                                                                                                                                                                                       |
| 1 | YNL187W | SWT21 | Protein involved in mRNA splicing; contains a consensus nuclear export signal (NES) sequence similar to the consensus sequence recognized by Crm1p; interacts genetically with Prp40p and Tgs1p; contains WD40 repeats                                                                                                                                                                                                                                                                  |
| 1 | YNL197C | WHI3  | RNA binding protein that sequesters CLN3 mRNA in cytoplasmic foci; regulates genes involved in the cell cycle, sister chromatid cohesion, and stress response; acts as a cytoplasmic retention factor for Cdc28p and associated cyclins; regulates cell fate and dose-dependently regulates the critical cell size required for passage through Start; Tpk1p (PKA) mediated phosphorylation (S568) inhibits Whi3p function, decreasing its interaction with CLN3 mRNA; regulates ploidy |
| 1 | YNL224C | SQS1  | Protein that stimulates the ATPase and helicase activities of Prp43p; acts with Prp43p to stimulate 18s rRNA maturation by Nob1p; overexpression antagonizes the suppression of splicing defects by <i>spp382</i> mutants; component of pre-ribosomal particles; relocates from nucleus to nucleolus upon DNA replication stress                                                                                                                                                        |
| 1 | YNL227C | JJJ1  | Co-chaperone that stimulates the ATPase activity of Ssa1p; required for a late step of ribosome biogenesis; associated with the cytosolic large ribosomal subunit; contains a J-domain; mutation causes defects in fluid-phase endocytosis                                                                                                                                                                                                                                              |
| 1 | YNL234W |       | Protein of unknown function with similarity to globins; has a functional heme-binding domain; mutant has aneuploidy tolerance; transcription induced by stress conditions; may be involved in glucose signaling or metabolism; regulated by Rgt1                                                                                                                                                                                                                                        |
| 1 | YNL238W | KEX2  | Kexin, a subtilisin-like protease (proprotein convertase); a calcium-dependent serine protease involved in the activation of proproteins of the secretory pathway                                                                                                                                                                                                                                                                                                                       |
| 1 | YNL239W | LAP3  | Cysteine aminopeptidase with homocysteine-thiolactonase activity; protects cells against homocysteine toxicity; has bleomycin hydrolase activity in vitro; transcription is regulated by galactose via Gal4p; orthologous to human BLMH                                                                                                                                                                                                                                                 |
| 1 | YNL246W | VPS75 | NAP family histone chaperone; binds to histones and Rtt109p, stimulating histone acetyltransferase activity; possesses nucleosome assembly activity in vitro; proposed role in vacuolar protein sorting and in double-strand break repair; protein abundance increases in response to DNA replication stress; relocates to the cytosol in response to hypoxia                                                                                                                           |
| 1 | YNL248C | RPA49 | RNA polymerase I subunit A49; essential for nucleolar assembly and for high polymerase loading rate; required for nucleolar localization of Rpa34p                                                                                                                                                                                                                                                                                                                                      |
| 1 | YNL253W | TEX1  | Protein involved in mRNA export; component of the transcription export (TREX) complex                                                                                                                                                                                                                                                                                                                                                                                                   |
| 1 | YNL266W |       | Dubious open reading frame; unlikely to encode a functional protein, based on available experimental and comparative sequence data; partially overlaps the verified ORF IST1/YNL265C                                                                                                                                                                                                                                                                                                    |

|   |           |       |                                                                                                                                                                                                                                                                                                                                                                                                                                                                                                      |
|---|-----------|-------|------------------------------------------------------------------------------------------------------------------------------------------------------------------------------------------------------------------------------------------------------------------------------------------------------------------------------------------------------------------------------------------------------------------------------------------------------------------------------------------------------|
| 1 | YNL268W   | LYP1  | Lysine permease; one of three amino acid permeases (Alp1p, Can1p, Lyp1p) responsible for uptake of cationic amino acids                                                                                                                                                                                                                                                                                                                                                                              |
| 1 | YNL270C   | ALP1  | Arginine transporter; expression is normally very low and it is unclear what conditions would induce significant expression; ALP1 has a paralog, CAN1, that arose from the whole genome duplication                                                                                                                                                                                                                                                                                                  |
| 1 | YNL273W   | TOF1  | Subunit of a replication-pausing checkpoint complex; Tof1p-Mrc1p-Csm3p acts at the stalled replication fork to promote sister chromatid cohesion after DNA damage, facilitating gap repair of damaged DNA; interacts with the MCM helicase; relocates to the cytosol in response to hypoxia                                                                                                                                                                                                          |
| 1 | YNL275W   | BOR1  | Boron efflux transporter of the plasma membrane; binds HCO <sub>3</sub> <sup>-</sup> , I <sup>-</sup> , Br <sup>-</sup> , NO <sub>3</sub> <sup>-</sup> and Cl <sup>-</sup> ; has similarity to the characterized boron efflux transporter <i>A. thaliana</i> BOR1                                                                                                                                                                                                                                    |
| 1 | YNL280C   | ERG24 | C-14 sterol reductase; acts in ergosterol biosynthesis; mutants accumulate the abnormal sterol ignosterol (ergosta-8,14 dienol), and are viable under anaerobic growth conditions but inviable on rich medium under aerobic conditions                                                                                                                                                                                                                                                               |
| 1 | YNL293W   | MSB3  | Rab GTPase-activating protein; regulates endocytosis via inactivation of Vps21p at endosomes and vacuole fusion via inactivation of Ypt7p at vacuoles; also acts on Ypt52p and Sec4p; localizes to plasma membrane, sites of polarized growth; relocates from bud neck to cytoplasm upon DNA replication stress; similar to TBC-domain Tre2 oncogene; MSB3 has a paralog, MSB4, that arose from the whole genome duplication; human homolog USP6NL can complement yeast <i>msb3 msb4</i> double null |
| 1 | YNL298W   | CLA4  | Cdc42p-activated signal transducing kinase; member of the PAK (p21-activated kinase) family, along with Ste20p and Skm1p; involved in septin ring assembly, vacuole inheritance, cytokinesis, sterol uptake regulation; phosphorylates Cdc3p and Cdc10p; CLA4 has a paralog, SKM1, that arose from the whole genome duplication                                                                                                                                                                      |
| 1 | YNR032C-A | HUB1  | Ubiquitin-like protein modifier; promotes alternative splicing of SRC1 pre-mRNA; binds non-covalently to the HIND domain of Snu66, may function in modification of Sph1p and Hbt1p, functionally complemented by the human or <i>S. pombe</i> ortholog; mechanism of Hub1p adduct formation not yet clear                                                                                                                                                                                            |
| 1 | YNR070W   | PDR18 | Putative transporter of the ATP-binding cassette (ABC) family; role in plasma membrane sterol incorporation; implicated in pleiotropic drug resistance; provides resistance to ethanol stress and contributes to a decreased intracellular accumulation of ethanol; the authentic, non-tagged protein is detected in highly purified mitochondria in high-throughput studies                                                                                                                         |
| 1 | YOL001W   | PHO80 | Cyclin; interacts with cyclin-dependent kinase Pho85p; regulates the response to nutrient levels and environmental conditions, including the response to phosphate limitation and stress-dependent calcium signaling                                                                                                                                                                                                                                                                                 |
| 1 | YOL003C   | PFA4  | Palmitoyltransferase with autoacylation activity; required for palmitoylation of amino acid permeases containing a C-terminal                                                                                                                                                                                                                                                                                                                                                                        |

|   |         |       |                                                                                                                                                                                                                                                                                                                                                                        |
|---|---------|-------|------------------------------------------------------------------------------------------------------------------------------------------------------------------------------------------------------------------------------------------------------------------------------------------------------------------------------------------------------------------------|
|   |         |       | Phe-Trp-Cys site; required for modification of Chs3p; member of the DHHC family of putative palmitoyltransferases                                                                                                                                                                                                                                                      |
| 1 | YOL008W | COQ10 | Coenzyme Q (ubiquinone) binding protein; functions in the delivery of Q <sub>6</sub> to its proper location for electron transport during respiration; START domain protein with homologs in bacteria and eukaryotes; respiratory growth defect of the null mutant is functionally complemented by human COQ10A                                                        |
| 1 | YOL014W |       | Putative protein of unknown function; mCherry fusion protein localizes to the cytosol and nucleus                                                                                                                                                                                                                                                                      |
| 1 | YOL015W | IRC10 | Protein of unknown function; subunit of the leading edge protein (LEP) complex (Ssp1-Ady3-Don1-Irc10) that forms a ring-like structure at the leading edge of the prospore membrane during meiosis II; null mutant displays increased levels of spontaneous Rad52p foci                                                                                                |
| 1 | YOL018C | TLG2  | Syntaxin-like t-SNARE; forms a complex with Tlg1p and Vti1p and mediates fusion of endosome-derived vesicles with the late Golgi; required along with VPS45 for an early step of the constitutive CVT pathway; interactions with Vps45 prevents Tlg2p degradation, and facilitates t-SNARE complex formation; homologous to mammalian SNARE protein syntaxin 16 (Sx16) |
| 1 | YOL036W |       | Protein of unknown function; potential Cdc28p substrate; YOL036W has a paralog, YIR016W, that arose from the whole genome duplication                                                                                                                                                                                                                                  |
| 1 | YOL037C |       | Dubious open reading frame; unlikely to encode a functional protein, based on available experimental and comparative sequence data; partially overlaps the uncharacterized ORF YOL036W                                                                                                                                                                                 |
| 1 | YOL049W | GSH2  | Glutathione synthetase; catalyzes the ATP-dependent synthesis of glutathione (GSH) from gamma-glutamylcysteine and glycine; induced by oxidative stress and heat shock                                                                                                                                                                                                 |
| 1 | YOL050C |       | Dubious open reading frame; unlikely to encode a functional protein, based on available experimental and comparative sequence data; overlaps verified gene GAL11; deletion confers sensitivity to 4-(N-(S-glutathionylacetyl)amino) phenylarsenoxide (GSAO)                                                                                                            |
| 1 | YOL053W | AIM39 | Protein of unknown function; null mutant displays elevated frequency of mitochondrial genome loss                                                                                                                                                                                                                                                                      |
| 1 | YOL054W | PSH1  | E3 ubiquitin ligase targeting centromere-binding protein Cse4p; mediates polyubiquitination and degradation of histone H3 variant Cse4p, preventing its mislocalization to euchromatin independent of Slx5p; ubiquitination of Cse4p may be antagonized by Scm3p                                                                                                       |
| 1 | YOL058W | ARG1  | Argininosuccinate synthetase; catalyzes the formation of L-argininosuccinate from citrulline and L-aspartate in the arginine biosynthesis pathway; potential Cdc28p substrate                                                                                                                                                                                          |
| 1 | YOL067C | RTG1  | Transcription factor (bHLH) involved in interorganelle communication; contributes to communication between mitochondria, peroxisomes, and nucleus; target of Hog1p; activated in stochastic pulses of nuclear localization                                                                                                                                             |
| 1 | YOL075C |       | Putative ABC transporter                                                                                                                                                                                                                                                                                                                                               |



|   |         |      |                                                                                                                                                                                                                                                                                                                                                                                                                                                                                         |
|---|---------|------|-----------------------------------------------------------------------------------------------------------------------------------------------------------------------------------------------------------------------------------------------------------------------------------------------------------------------------------------------------------------------------------------------------------------------------------------------------------------------------------------|
| 1 | YOL096C | COQ3 | O-methyltransferase; catalyzes two different O-methylation steps in ubiquinone (Coenzyme Q) biosynthesis; component of a mitochondrial ubiquinone-synthesizing complex; phosphoprotein                                                                                                                                                                                                                                                                                                  |
| 1 | YOL111C | MDY2 | Protein involved in inserting tail-anchored proteins into ER membranes; forms a complex with Get4p; required for efficient mating; involved in shmoo formation and nuclear migration in the pre-zygote; associates with ribosomes                                                                                                                                                                                                                                                       |
| 1 | YOL112W | MSB4 | GTPase-activating protein of the Ras superfamily; acts primarily on Sec4p, localizes to the bud site and bud tip; msb3 msb4 double mutation causes defects in secretion and actin organization; similar to the TBC-domain Tre2 oncogene; MSB4 has a paralog, MSB3, that arose from the whole genome duplication; human homolog USP6NL can complement yeast msb3 msb4 double null mutant                                                                                                 |
| 1 | YOL115W | PAP2 | Non-canonical poly(A) polymerase; involved in nuclear RNA degradation as a component of TRAMP; catalyzes polyadenylation of hypomodified tRNAs, and snoRNA and rRNA precursors; required for mRNA surveillance and maintenance of genome integrity, serving as a link between RNA and DNA metabolism; overlapping but non-redundant functions with Trf5p; relocalizes to cytosol in response to hypoxia                                                                                 |
| 1 | YOL151W | GRE2 | 3-methylbutanal reductase and NADPH-dependent methylglyoxal reductase; stress induced (osmotic, ionic, oxidative, heat shock and heavy metals); regulated by the HOG pathway; restores resistance to glycolaldehyde by coupling reduction of glycolaldehyde to ethylene glycol and oxidation of NADPH to NADP <sup>+</sup> ; protein abundance increases in response to DNA replication stress; methylglyoxal reductase (NADPH-dependent) is also known as D-lactaldehyde dehydrogenase |
| 1 | YOR002W | ALG6 | Alpha 1,3 glucosyltransferase; involved in transfer of oligosaccharides from dolichyl pyrophosphate to asparagine residues of proteins during N-linked protein glycosylation; C998T transition in human ortholog ALG6 causes carbohydrate-deficient glycoprotein syndrome type-Ic; wild-type human ortholog ALG6 can partially complement yeast alg6 mutant                                                                                                                             |
| 1 | YOR011W | AUS1 | Plasma membrane sterol transporter of the ATP-binding cassette family; required, along with Pdr11p, for uptake of exogenous sterols and their incorporation into the plasma membrane; activity is stimulated by phosphatidylserine; sterol uptake is required for anaerobic growth because sterol biosynthesis requires oxygen; AUS1 has a paralog, PDR11, that arose from the whole genome duplication                                                                                 |
| 1 | YOR026W | BUB3 | Kinetochores checkpoint WD40 repeat protein; localizes to kinetochores during prophase and metaphase, delays anaphase in the presence of unattached kinetochores; forms complexes with Mad1p-Bub1p and with Cdc20p, binds Mad2p and Mad3p; functions at kinetochores to activate APC/C-Cdc20p for normal mitotic progression                                                                                                                                                            |

|   |         |       |                                                                                                                                                                                                                                                                                                                                                                                                                                                                                                 |
|---|---------|-------|-------------------------------------------------------------------------------------------------------------------------------------------------------------------------------------------------------------------------------------------------------------------------------------------------------------------------------------------------------------------------------------------------------------------------------------------------------------------------------------------------|
| 1 | YOR065W | CYT1  | Cytochrome c1; component of the mitochondrial respiratory chain; expression is regulated by the heme-activated, glucose-repressed Hap2p/3p/4p/5p CCAAT-binding complex                                                                                                                                                                                                                                                                                                                          |
| 1 | YOR068C | VAM10 | Protein involved in vacuole morphogenesis; acts at an early step of homotypic vacuole fusion that is required for vacuole tethering                                                                                                                                                                                                                                                                                                                                                             |
| 1 | YOR069W | VPS5  | Nexin-1 homolog; required for localizing membrane proteins from a prevacuolar/late endosomal compartment back to late Golgi; structural component of retromer membrane coat complex; forms a retromer subcomplex with Vps17p; required for recruiting the retromer complex to the endosome membranes; VPS5 has a paralog, YKR078W, that arose from the whole genome duplication                                                                                                                 |
| 1 | YOR079C | ATX2  | Golgi membrane protein involved in manganese homeostasis; overproduction suppresses the sod1 (copper, zinc superoxide dismutase) null mutation                                                                                                                                                                                                                                                                                                                                                  |
| 1 | YOR089C | VPS21 | Endosomal Rab family GTPase; required for endocytic transport and sorting of vacuolar hydrolases; required for endosomal localization of the CORVET complex; required with YPT52 for MVB biogenesis and sorting; involved in autophagy and ionic stress tolerance; geranylgeranylation required for membrane association; protein abundance increases in response to DNA replication stress; mammalian Rab5 homolog; VPS21 has a paralog, YPT53, that arose from the whole genome duplication   |
| 1 | YOR096W | RPS7A | Protein component of the small (40S) ribosomal subunit; interacts with Kti11p; deletion causes hypersensitivity to zymocin; homologous to mammalian ribosomal protein S7, no bacterial homolog; RPS7A has a paralog, RPS7B, that arose from the whole genome duplication                                                                                                                                                                                                                        |
| 1 | YOR130C | ORT1  | Ornithine transporter of the mitochondrial inner membrane; exports ornithine from mitochondria as part of arginine biosynthesis; functionally complemented by human ortholog, SLC25A15, which is associated with hyperammonaemia-hyperornithinaemia-homocitrullinuria (HHH) syndrome, but HHH-associated variants fail to complement                                                                                                                                                            |
| 1 | YOR141C | ARP8  | Nuclear actin-related protein involved in chromatin remodeling; component of chromatin-remodeling enzyme complexes; has mRNA binding activity                                                                                                                                                                                                                                                                                                                                                   |
| 1 | YOR172W | YRM1  | Zinc finger transcription factor involved in multidrug resistance; Zn(2)-Cys(6) zinc finger transcription factor; activates genes involved in multidrug resistance; paralog of Yrr1p, acting on an overlapping set of target genes                                                                                                                                                                                                                                                              |
| 1 | YOR187W | TUF1  | Mitochondrial translation elongation factor Tu (EF-Tu); involved in fundamental pathway of mtDNA homeostasis; comprises both GTPase and guanine nucleotide exchange factor activities, while these activities are found in separate proteins in <i>S. pombe</i> and humans; rare mutations in human mitochondrial elongation factor Tu (EFTu) associated with severe lactic acidosis, rapidly progressive fatal encephalopathy, severe infantile macrocystic leukodystrophy with micropolygyria |

|   |         |        |                                                                                                                                                                                                                                                                                                                                                                                                                                                                                                  |
|---|---------|--------|--------------------------------------------------------------------------------------------------------------------------------------------------------------------------------------------------------------------------------------------------------------------------------------------------------------------------------------------------------------------------------------------------------------------------------------------------------------------------------------------------|
| 1 | YOR198C | BFR1   | Component of mRNP complexes associated with polyribosomes; involved in localization of mRNAs to P bodies; implicated in secretion and nuclear segregation; multicopy suppressor of BFA (Brefeldin A) sensitivity                                                                                                                                                                                                                                                                                 |
| 1 | YOR199W |        | Dubious open reading frame; unlikely to encode a functional protein, based on available experimental and comparative sequence data                                                                                                                                                                                                                                                                                                                                                               |
| 1 | YOR200W |        | Dubious open reading frame; unlikely to encode a functional protein, based on available experimental and comparative sequence data; partially overlaps the verified ORF MRM1/YOR201c                                                                                                                                                                                                                                                                                                             |
| 1 | YOR215C | AIM41  | Protein of unknown function; the authentic protein is detected in highly purified mitochondria in high-throughput studies; null mutant displays reduced frequency of mitochondrial genome loss                                                                                                                                                                                                                                                                                                   |
| 1 | YOR216C | RUD3   | Golgi matrix protein; involved in the structural organization of the cis-Golgi; interacts genetically with COG3 and USO1                                                                                                                                                                                                                                                                                                                                                                         |
| 1 | YOR219C | STE13  | Dipeptidyl aminopeptidase; Golgi integral membrane protein that cleaves on the carboxyl side of repeating -X-Ala- sequences, required for maturation of alpha factor, transcription is induced by a-factor                                                                                                                                                                                                                                                                                       |
| 1 | YOR221C | MCT1   | Predicted malonyl-CoA:ACP transferase; putative component of a type-II mitochondrial fatty acid synthase that produces intermediates for phospholipid remodeling                                                                                                                                                                                                                                                                                                                                 |
| 1 | YOR227W | HER1   | Protein of unknown function; required for proliferation or remodeling of the ER that is caused by overexpression of Hmg2p; may interact with ribosomes, based on co-purification experiments; HER1 has a paralog, GIP3, that arose from the whole genome duplication                                                                                                                                                                                                                             |
| 1 | YOR228C | MCP1   | Mitochondrial protein of unknown function involved in lipid homeostasis; integral membrane protein that localizes to the mitochondrial outer membrane; involved in mitochondrial morphology; interacts genetically with MDM10, and other members of the ERMES complex; contains five predicted transmembrane domains                                                                                                                                                                             |
| 1 | YOR233W | KIN4   | Serine/threonine protein kinase; inhibits the mitotic exit network (MEN) when the spindle position checkpoint is activated; localized asymmetrically to mother cell cortex, spindle pole body and bud neck; KIN4 has a paralog, FRK1, that arose from the whole genome duplication                                                                                                                                                                                                               |
| 1 | YOR239W | ABP140 | AdoMet-dependent tRNA methyltransferase and actin binding protein; C-terminal domain is responsible for 3-methylcytidine modification of residue 32 of the tRNA anticodon loop of tRNA-Thr and tRNA-Ser and contains an S-adenosylmethionine (AdoMet) binding motif; N-terminal actin binding sequence interacts with actin filaments and localizes to actin patches and cables; N- and C-terminal domains are encoded in separate ORFs that are translated into one protein via a +1 frameshift |
| 1 | YOR241W | MET7   | Folylpolyglutamate synthetase; catalyzes extension of the glutamate chains of the folate coenzymes, required for methionine                                                                                                                                                                                                                                                                                                                                                                      |

|   |         |      |                                                                                                                                                                                                                                                                                                                                                                                                                                                                                     |
|---|---------|------|-------------------------------------------------------------------------------------------------------------------------------------------------------------------------------------------------------------------------------------------------------------------------------------------------------------------------------------------------------------------------------------------------------------------------------------------------------------------------------------|
|   |         |      | synthesis and for maintenance of mitochondrial DNA; protein abundance increases in response to DNA replication stress                                                                                                                                                                                                                                                                                                                                                               |
| 1 | YOR245C | DGA1 | Diacylglycerol acyltransferase; catalyzes the terminal step of triacylglycerol (TAG) formation, acylates diacylglycerol using acyl-CoA as an acyl donor; Lro1p and Dga1p can O-acylate ceramides; localized to lipid particles                                                                                                                                                                                                                                                      |
| 1 | YOR258W | HNT3 | DNA 5' AMP hydrolase involved in DNA repair; member of the histidine triad (HIT) superfamily of nucleotide-binding proteins; homolog of Aprataxin, a Hint related protein that is mutated in individuals with ataxia with oculomotor apraxia; relative distribution to nuclear foci decreases upon DNA replication stress                                                                                                                                                           |
| 1 | YOR268C |      | Putative protein of unknown function; sporulation is abnormal in homozygous diploid; SWAT-GFP fusion protein localizes to the nucleus; YOR268C is not an essential gene                                                                                                                                                                                                                                                                                                             |
| 1 | YOR274W | MOD5 | Delta 2-isopentenyl pyrophosphate:tRNA isopentenyl transferase; required for biosynthesis of isopentenyladenosine in mitochondrial and cytoplasmic tRNAs; also has a role in tRNA gene-mediated silencing; gene encodes two isozymic forms; converts to a prion form, prion conversion contributes to azole antifungal resistance by upregulating ergosterol biosynthesis; homolog of human TRIT1, a mutation in which is associated with severe combined respiratory chain defects |
| 1 | YOR288C | MPD1 | Member of the protein disulfide isomerase (PDI) family; interacts with and inhibits the chaperone activity of Cne1p; MPD1 overexpression in a pdi1 null mutant suppresses defects in Pdi1p functions such as carboxypeptidase Y maturation                                                                                                                                                                                                                                          |
| 1 | YOR355W | GDS1 | Protein of unknown function; required for growth on glycerol as a carbon source; the authentic, non-tagged protein is detected in highly purified mitochondria in high-throughput studies                                                                                                                                                                                                                                                                                           |
| 1 | YOR365C |      | Putative protein of unknown function; not an essential protein; YOR365C has a paralog, FLC2, that arose from the whole genome duplication                                                                                                                                                                                                                                                                                                                                           |
| 1 | YPL002C | SNF8 | Component of the ESCRT-II complex; ESCRT-II is involved in ubiquitin-dependent sorting of proteins into the endosome; appears to be functionally related to SNF7; involved in glucose derepression                                                                                                                                                                                                                                                                                  |
| 1 | YPL022W | RAD1 | Single-stranded DNA endonuclease (with Rad10p); cleaves single-stranded DNA during nucleotide excision repair and double-strand break repair; subunit of Nucleotide Excision Repair Factor 1 (NEF1); homolog of human XPF protein                                                                                                                                                                                                                                                   |
| 1 | YPL027W | SMA1 | Protein of unknown function involved in prospore membrane assembly; involved in the assembly of the prospore membrane during sporulation; interacts with Spo14p                                                                                                                                                                                                                                                                                                                     |
| 1 | YPL034W |      | Putative protein of unknown function; YPL034W is not essential gene                                                                                                                                                                                                                                                                                                                                                                                                                 |
| 1 | YPL036W | PMA2 | Plasma membrane H <sup>+</sup> -ATPase; isoform of Pma1p, involved in pumping protons out of the cell; regulator of cytoplasmic pH and plasma membrane potential                                                                                                                                                                                                                                                                                                                    |
| 1 | YPL059W | GRX5 | Glutathione-dependent oxidoreductase; mitochondrial matrix protein involved at an early step in the biogenesis of iron-sulfur                                                                                                                                                                                                                                                                                                                                                       |

|   |         |        |                                                                                                                                                                                                                                                                                                                                                                                                                              |
|---|---------|--------|------------------------------------------------------------------------------------------------------------------------------------------------------------------------------------------------------------------------------------------------------------------------------------------------------------------------------------------------------------------------------------------------------------------------------|
|   |         |        | centers along with Bol1p; hydroperoxide and superoxide-radical responsive; monothiol glutaredoxin subfamily member along with Grx3p and Grx4p                                                                                                                                                                                                                                                                                |
| 1 | YPL069C | BTS1   | Geranylgeranyl diphosphate synthase (GGPS); increases the intracellular pool of geranylgeranyl diphosphate, suppressor of bet2 mutation that causes defective geranylgeranylation of small GTP-binding proteins that mediate vesicular traffic                                                                                                                                                                               |
| 1 | YPL074W | YTA6   | Putative ATPase of the CDC48/PAS1/SEC18 (AAA) family; localized to the cortex of mother cells but not to daughter cells; relocalizes from cytoplasm to plasma membrane foci upon DNA replication stress                                                                                                                                                                                                                      |
| 1 | YPL079W | RPL21B | Ribosomal 60S subunit protein L21B; homologous to mammalian ribosomal protein L21, no bacterial homolog; RPL21B has a paralogue, RPL21A, that arose from the whole genome duplication                                                                                                                                                                                                                                        |
| 1 | YPL084W | BRO1   | Cytoplasmic class E vacuolar protein sorting (VPS) factor; coordinates deubiquitination in the multivesicular body (MVB) pathway by recruiting Doa4p to endosomes                                                                                                                                                                                                                                                            |
| 1 | YPL091W | GLR1   | Cytosolic and mitochondrial glutathione oxidoreductase; converts oxidized glutathione to reduced glutathione; cytosolic Glr1p is the main determinant of the glutathione redox state of the mitochondrial intermembrane space; mitochondrial Glr1p has a role in resistance to hyperoxia; protein abundance increases in response to DNA replication stress                                                                  |
| 1 | YPL097W | MSY1   | Mitochondrial tyrosyl-tRNA synthetase                                                                                                                                                                                                                                                                                                                                                                                        |
| 1 | YPL104W | MSD1   | Mitochondrial aspartyl-tRNA synthetase; required for acylation of aspartyl-tRNA; yeast and bacterial aspartyl-, asparaginyl-, and lysyl-tRNA synthetases contain regions with high sequence similarity, suggesting a common ancestral gene                                                                                                                                                                                   |
| 1 | YPL105C | SYH1   | Protein of unknown function that influences nuclear pore distribution; co-purifies with ribosomes; contains a GYF domain, which bind proline-rich sequences; deletion extends chronological lifespan; SYH1 has a paralogue, SMY2, that arose from the whole genome duplication                                                                                                                                               |
| 1 | YPL106C | SSE1   | ATPase component of heat shock protein Hsp90 chaperone complex; serves as nucleotide exchange factor to load ATP onto the SSA class of cytosolic Hsp70s; plays a role in prion propagation and determining prion variants; binds unfolded proteins; member of Hsp110 subclass of HSP70 proteins; deletion results in spindle elongation in S phase; SSE1 has a paralogue, SSE2, that arose from the whole genome duplication |
| 1 | YPL144W | POC4   | Component of a heterodimeric Poc4p-Irc25p chaperone; involved in assembly of alpha subunits into the 20S proteasome; may regulate formation of proteasome isoforms with alternative subunits under different conditions; upregulates proteasome assembly in response to the unfolded protein response activated by mistargeting of proteins (UPRam)                                                                          |
| 1 | YPL152W | RRD2   | Peptidyl-prolyl cis/trans-isomerase; also activates the phosphotyrosyl phosphatase activity of protein phosphatase 2A (PP2A); regulates G1 phase progression, the osmoresponse, microtubule dynamics; subunit of the Tap42p-Pph21p-Rrd2p                                                                                                                                                                                     |

|   |         |        |                                                                                                                                                                                                                                                                                                                                                                                                                                                                                |
|---|---------|--------|--------------------------------------------------------------------------------------------------------------------------------------------------------------------------------------------------------------------------------------------------------------------------------------------------------------------------------------------------------------------------------------------------------------------------------------------------------------------------------|
|   |         |        | complex; protein abundance increases in response to DNA replication stress                                                                                                                                                                                                                                                                                                                                                                                                     |
| 1 | YPL157W | TGS1   | Trimethyl guanosine synthase, conserved nucleolar methyl transferase; converts the m(7)G cap structure of snRNAs, snoRNAs, and telomerase TLC1 RNA to m(2,2,7)G; also required for nucleolar assembly and splicing of meiotic pre-mRNAs; interacts with Swm2p, which may confer substrate specificity on Tgs1p                                                                                                                                                                 |
| 1 | YPL158C | AIM44  | Protein that regulates Cdc42p and Rho1p; functions in the late steps of cytokinesis and cell separation; sustains Rho1p at the cell division site after actomyosin ring contraction; inhibits the activation of Cdc42-Cla4 at the cell division site to prevent budding inside the old bud neck; transcription is regulated by Swi5p; null mutant displays elevated frequency of mitochondrial genome loss; relocalizes from bud neck to cytoplasm upon DNA replication stress |
| 1 | YPL163C | SVS1   | Cell wall and vacuolar protein; required for wild-type resistance to vanadate; SVS1 has a paralog, SRL1, that arose from the whole genome duplication                                                                                                                                                                                                                                                                                                                          |
| 1 | YPL167C | REV3   | Catalytic subunit of DNA polymerase zeta; involved in translesion synthesis during post-replication repair; required for mutagenesis induced by DNA damage; involved in double-strand break repair; forms a complex with Rev7p, Pol31p and Pol32p                                                                                                                                                                                                                              |
| 1 | YPL168W | MRX4   | Protein that associates with mitochondrial ribosome; green fluorescent protein (GFP)-fusion protein localizes to the mitochondrion; expression may be cell cycle-regulated                                                                                                                                                                                                                                                                                                     |
| 1 | YPL173W | MRPL40 | Mitochondrial ribosomal protein of the large subunit                                                                                                                                                                                                                                                                                                                                                                                                                           |
| 1 | YPL174C | NIP100 | Large subunit of the dynactin complex; dynactin is involved in partitioning the mitotic spindle between mother and daughter cells; putative ortholog of mammalian p150(glued)                                                                                                                                                                                                                                                                                                  |
| 1 | YPL180W | TCO89  | Subunit of TORC1 (Tor1p or Tor2p-Kog1p-Lst8p-Tco89p); regulates global H3K56ac; TORC1 complex regulates growth in response to nutrient availability; cooperates with Ssd1p in the maintenance of cellular integrity; deletion strains are hypersensitive to rapamycin                                                                                                                                                                                                          |
| 1 | YPL182C |        | Dubious open reading frame; unlikely to encode a functional protein, based on available experimental and comparative sequence data; partially overlaps the verified gene CTI6/YPL181W                                                                                                                                                                                                                                                                                          |
| 1 | YPL188W | POS5   | Mitochondrial NADH kinase; phosphorylates NADH; also phosphorylates NAD(+) with lower specificity; required for the response to oxidative stress                                                                                                                                                                                                                                                                                                                               |
| 1 | YPL195W | APL5   | Delta adaptin-like subunit of the clathrin associated protein complex; functions in transport of alkaline phosphatase to the vacuole via the alternate pathway; suppressor of loss of casein kinase 1 function; the clathrin associated protein complex is also known as AP-3                                                                                                                                                                                                  |
| 1 | YPL196W | OXR1   | Protein of unknown function required for oxidative damage resistance; required for normal levels of resistance to oxidative                                                                                                                                                                                                                                                                                                                                                    |

|   |         |      |                                                                                                                                                                                                                                                                                                                                                                                                                                                                                      |
|---|---------|------|--------------------------------------------------------------------------------------------------------------------------------------------------------------------------------------------------------------------------------------------------------------------------------------------------------------------------------------------------------------------------------------------------------------------------------------------------------------------------------------|
|   |         |      | damage; null mutants are sensitive to hydrogen peroxide; member of a conserved family of proteins found in eukaryotes                                                                                                                                                                                                                                                                                                                                                                |
| 1 | YPL207W | TYW1 | Iron-sulfer protein required for synthesis of Wybutosine modified tRNA; Wybutosine is a modified guanosine found at the 3'-position adjacent to the anticodon of phenylalanine tRNA which supports reading frame maintenance by stabilizing codon-anticodon interactions; induction by Yap5p in response to iron provides protection from high iron toxicity; overexpression results in increased cellular iron                                                                      |
| 1 | YPL208W | RKM1 | SET-domain lysine-N-methyltransferase; catalyzes the formation of dimethyllysine residues on the large ribosomal subunit proteins L23 (Rpl23Ap and Rpl23Bp) and monomethyllysine residues on L18 (Rps18Ap and Rps18Bp)                                                                                                                                                                                                                                                               |
| 1 | YPL212C | PUS1 | tRNA:pseudouridine synthase; introduces pseudouridines at positions 26-28, 34-36, 65, and 67 of tRNA; also acts on U2 snRNA; also pseudouridylates some mRNAs, and pseudouridylation level varies with growth phase; nuclear protein that appears to be involved in tRNA export; PUS1 has a paralog, PUS2, that arose from the whole genome duplication                                                                                                                              |
| 1 | YPL213W | LEA1 | Component of U2 snRNP complex; disruption causes reduced U2 snRNP levels; physically interacts with Msl1p; putative homolog of human U2A' snRNP protein                                                                                                                                                                                                                                                                                                                              |
| 1 | YPL215W | CBP3 | Mitochondrial protein required for assembly of cytochrome bc1 complex; forms a complex with Cbp6p that binds to mt ribosomes near the polypeptide tunnel exit and promotes efficient translation of the COB mRNA; Cbp3p-Cbp6p complex also interacts with newly synthesized cytochrome b (Cobp) and Cbp4p to promote assembly of Cobp into the cytochrome bc1 complex; Cbp3p-Cbp6p complex is sequestered if assembly of Complex III is blocked, downregulating COB mRNA translation |
| 1 | YPL216W |      | Putative protein of unknown function; not an essential gene; YPL216W has a paralog, ITC1, that arose from the whole genome duplication                                                                                                                                                                                                                                                                                                                                               |
| 1 | YPL219W | PCL8 | Cyclin; interacts with Pho85p cyclin-dependent kinase (Cdk) to phosphorylate and regulate glycogen synthase, also activates Pho85p for Glc8p phosphorylation; PCL8 has a paralog, PCL10, that arose from the whole genome duplication                                                                                                                                                                                                                                                |
| 1 | YPL227C | ALG5 | UDP-glucose:dolichyl-phosphate glucosyltransferase; involved in asparagine-linked glycosylation in the endoplasmic reticulum; human ortholog ALG5 can partially complement yeast alg5 mutant                                                                                                                                                                                                                                                                                         |
| 1 | YPL230W | USV1 | Putative transcription factor containing a C2H2 zinc finger; mutation affects transcriptional regulation of genes involved in growth on non-fermentable carbon sources, response to salt stress and cell wall biosynthesis; USV1 has a paralog, RGM1, that arose from the whole genome duplication                                                                                                                                                                                   |
| 1 | YPL232W | SSO1 | Plasma membrane t-SNARE; involved in fusion of secretory vesicles at the plasma membrane and in vesicle fusion during sporulation; forms a complex with Sec9p that binds v-SNARE Snc2p; syntaxin homolog; functionally redundant with Sso2p;                                                                                                                                                                                                                                         |

|   |         |        |                                                                                                                                                                                                                                                                                                                                                                                                                                                     |
|---|---------|--------|-----------------------------------------------------------------------------------------------------------------------------------------------------------------------------------------------------------------------------------------------------------------------------------------------------------------------------------------------------------------------------------------------------------------------------------------------------|
|   |         |        | SSO1 has a paralog, SSO2, that arose from the whole genome duplication                                                                                                                                                                                                                                                                                                                                                                              |
| 1 | YPL234C | VMA11  | Vacuolar ATPase V0 domain subunit c'; involved in proton transport activity; hydrophobic integral membrane protein (proteolipid) containing four transmembrane segments; N and C termini are in the vacuolar lumen                                                                                                                                                                                                                                  |
| 1 | YPL249C | GYP5   | GTPase-activating protein (GAP) for yeast Rab family members; involved in ER to Golgi trafficking; exhibits GAP activity toward Ypt1p that is stimulated by Gyl1p, also acts on Sec4p; interacts with Gyl1p, Rvs161p and Rvs167p; involved in recruiting Rvs167p to the bud tip during polarized growth; relocalizes from bud neck to cytoplasm upon DNA replication stress; GYP5 has a paralog, GYL1, that arose from the whole genome duplication |
| 1 | YPL264C |        | Putative membrane protein of unknown function; physically interacts with Hsp82p; YPL264C is not an essential gene                                                                                                                                                                                                                                                                                                                                   |
| 1 | YPR002W | PDH1   | Putative 2-methylcitrate dehydratase; mitochondrial protein that participates in respiration; induced by diauxic shift; homologous to E. coli PrpD, may take part in the conversion of 2-methylcitrate to 2-methylisocitrate                                                                                                                                                                                                                        |
| 1 | YPR011C |        | Mitochondrial transporter; major substrates are adenosine 5'-phosphosulfate (APS) and 3'-phospho-adenosine 5'-phosphosulfate (PAPS); member of the mitochondrial carrier family; the authentic, non-tagged protein is detected in highly purified mitochondria in high-throughput studies                                                                                                                                                           |
| 1 | YPR043W | RPL43A | Ribosomal 60S subunit protein L43A; null mutation confers a dominant lethal phenotype; homologous to mammalian ribosomal protein L37A, no bacterial homolog; RPL43A has a paralog, RPL43B, that arose from the whole genome duplication                                                                                                                                                                                                             |
| 1 | YPR044C | OPI11  | Dubious open reading frame; unlikely to encode a functional protein, based on available experimental and comparative sequence data; largely overlaps verified gene RPL43A/YPR043W; deletion confers sensitivity to GSAO                                                                                                                                                                                                                             |
| 1 | YPR045C | THP3   | Protein that may have a role in transcription elongation; forms a complex with Csn12p that is recruited to transcribed genes; possibly involved in splicing based on pre-mRNA accumulation defect for many intron-containing genes                                                                                                                                                                                                                  |
| 1 | YPR101W | SNT309 | Member of the NineTeen Complex (NTC); this complex contains Prp19p and stabilizes U6 snRNA in catalytic forms of the spliceosome containing U2, U5, and U6 snRNAs; interacts physically and genetically with Prp19p                                                                                                                                                                                                                                 |
| 1 | YPR120C | CLB5   | B-type cyclin involved in DNA replication during S phase; activates Cdc28p to promote initiation of DNA synthesis; functions in formation of mitotic spindles along with Clb3p and Clb4p; most abundant during late G1 phase; CLB5 has a paralog, CLB6, that arose from the whole genome duplication                                                                                                                                                |
| 1 | YPR121W | THI22  | Protein with similarity to hydroxymethylpyrimidine phosphate kinases; member of a gene family with THI20 and THI21; not required for thiamine biosynthesis; SWAT-GFP and mCherry fusion proteins localize to the endoplasmic reticulum and vacuole respectively                                                                                                                                                                                     |



|   |         |      |                                                                                                                                                                                                                                                                                                                                                                                                                                                                             |
|---|---------|------|-----------------------------------------------------------------------------------------------------------------------------------------------------------------------------------------------------------------------------------------------------------------------------------------------------------------------------------------------------------------------------------------------------------------------------------------------------------------------------|
| 1 | YPR140W | TAZ1 | Lyso-phosphatidylcholine acyltransferase; required for normal phospholipid content of mitochondrial membranes; major determinant of the final acyl chain composition of the mitochondrial-specific phospholipid cardiolipin; mutations in human ortholog tafazzin (TAZ) cause Barth syndrome, a rare X-linked disease characterized by skeletal and cardiomyopathy and bouts of cyclic neutropenia; a specific splice variant of human TAZ can complement yeast null mutant |
| 1 | YPR141C | KAR3 | Minus-end-directed microtubule motor; functions in mitosis and meiosis, localizes to the spindle pole body and localization is dependent on functional Cik1p, required for nuclear fusion during mating; potential Cdc28p substrate                                                                                                                                                                                                                                         |
| 1 | YPR159W | KRE6 | Type II integral membrane protein; required for beta-1,6 glucan biosynthesis; putative beta-glucan synthase; localizes to ER, plasma membrane, sites of polarized growth and secretory vesicles; functionally redundant with Skn1p; KRE6 has a paralog, SKN1, that arose from the whole genome duplication                                                                                                                                                                  |
| 1 | YPR160W | GPH1 | Glycogen phosphorylase required for the mobilization of glycogen; non-essential; regulated by cyclic AMP-mediated phosphorylation; phosphorylation by Cdc28p may coordinately regulate carbohydrate metabolism and the cell cycle; expression is regulated by stress-response elements and by the HOG MAP kinase pathway                                                                                                                                                    |
| 1 | YPR163C | TIF3 | Translation initiation factor eIF-4B; contains an RNA recognition motif and binds to single-stranded RNA; has RNA annealing activity; interacts with Rps20p at the head of the 40S ribosomal subunit and alters the structure of the mRNA entry channel                                                                                                                                                                                                                     |
| 1 | YPR166C | MRP2 | Mitochondrial ribosomal protein of the small subunit                                                                                                                                                                                                                                                                                                                                                                                                                        |
| 1 | YPR173C | VPS4 | AAA-ATPase involved in multivesicular body (MVB) protein sorting; ATP-bound Vps4p localizes to endosomes and catalyzes ESCRT-III disassembly and membrane release; ATPase activity is activated by Vta1p; regulates cellular sterol metabolism                                                                                                                                                                                                                              |
| 1 | YPR196W |      | Putative maltose-responsive transcription factor                                                                                                                                                                                                                                                                                                                                                                                                                            |
| 1 | YPR200C | ARR2 | Arsenate reductase required for arsenate resistance; converts arsenate to arsenite which can then be exported from cells by Arr3p                                                                                                                                                                                                                                                                                                                                           |

Supplementary Table S2. Yeast strains used in this study.

| Strain                       | Relevant Phenotype                                                                                            | Source                                   |
|------------------------------|---------------------------------------------------------------------------------------------------------------|------------------------------------------|
| <i>trk1Δtrk2Δ</i><br>(YAK01) | <i>MATα his3Δ leu2Δ ura3Δ trk1Δ::URA3 trk2Δ::NATMX can1Δ::STE2pr-HIS3</i>                                     | (Kolb et al, 2014)                       |
| <i>trk1Δtrk2Δvps23Δ</i>      | <i>MATα his3Δ leu2Δ ura3Δ trk1Δ::URA3 trk2Δ::NATMX can1Δ::STE2pr-HIS3 vps23Δ::KANMX</i>                       | (Kolb et al, 2014)                       |
| BY4742 (PEP4 or CDC48)       | <i>MATα his3Δ leu2Δ ura3Δ</i>                                                                                 | Invitrogen                               |
| <i>pep4Δ</i>                 | <i>MATα his3Δ leu2Δ ura3Δ pep4Δ::KANMX</i>                                                                    | Invitrogen                               |
| <i>cdc48-2</i>               | <i>MATα his3Δ, leu2Δ, ura3Δ, cdc48-2::KANMX</i>                                                               | (Kolb et al, 2014)<br>(Moir et al, 1982) |
| HRD1DOA10                    | <i>MATα ade2, his3, leu2, ura3, trp1</i>                                                                      | (Pagant et al, 2007)                     |
| <i>hrd1Δdoa10Δ</i>           | <i>MATα ade2 his3 leu2 ura3 trp1 hrd1::KANMX DOA10::KANMX</i>                                                 | (Pagant et al, 2007)                     |
| SSA1                         | <i>MATα his3-11,15 leu2-3,112, ura3-52 trp1- Δ1, lys2, ssa2-1(LEU2), ssa3-1(TRP1), ssa4- 2(LYS2)</i>          | (Becker et al, 1996)                     |
| <i>ssa1-45</i>               | <i>MATα, his3-11,15, leu2-3,112, ura3-52, trp1-Δ1, lys2, ssa1-45, ssa2-1(LEU), ssa3-1(TRP1), ssa4-2(LYS2)</i> | (Becker et al, 1996)                     |
| <i>trk1Δtrk2Δvps3Δ</i>       | <i>MATα his3Δ leu2Δ ura3Δ trk1Δ::URA3 trk2Δ::NATMX vps3Δ::KANMX</i>                                           | This study                               |
| <i>trk1Δtrk2Δvps8Δ</i>       | <i>MATα his3Δ leu2Δ ura3Δ trk1Δ::URA3 trk2Δ::NATMX vps8Δ::KANMX</i>                                           | This study                               |
| <i>trk1Δtrk2Δvps27Δ</i>      | <i>MATα his3Δ leu2Δ ura3Δ trk1Δ::URA3 trk2Δ::NATMX vps27Δ::KANMX</i>                                          | (Kolb et al, 2014)                       |
| <i>trk1Δtrk2Δvps36Δ</i>      | <i>MATα his3Δ leu2Δ ura3Δ trk1Δ::URA3 trk2Δ::NATMX vps36Δ::KANMX</i>                                          | This study                               |
| <i>trk1Δtrk2Δvps20Δ</i>      | <i>MATα his3Δ leu2Δ ura3Δ trk1Δ::URA3 trk2Δ::NATMX vps20Δ::KANMX</i>                                          | This study                               |
| <i>trk1Δtrk2Δsnf7Δ</i>       | <i>MATα his3Δ leu2Δ ura3Δ trk1Δ::URA3 trk2Δ::NATMX snf7Δ::KANMX</i>                                           | This study                               |
| <i>trk1Δtrk2Δend3Δ</i>       | <i>MATα his3Δ leu2Δ ura3Δ trk1Δ::URA3 trk2Δ::NATMX end3Δ::KANMX</i>                                           | This study                               |
| <i>trk1Δtrk2Δpep12Δ</i>      | <i>MATα his3Δ leu2Δ ura3Δ trk1Δ::URA3 trk2Δ::NATMX pep12Δ::KANMX</i>                                          | This study                               |
| <i>trk1Δtrk2Δgos1Δ</i>       | <i>MATα his3Δ leu2Δ ura3Δ trk1Δ::URA3 trk2Δ::NATMX can1Δ::STE2pr-HIS3 gos1Δ::KANMX</i>                        | This study                               |
| <i>trk1Δtrk2Δbsd2Δ</i>       | <i>MATα his3Δ leu2Δ ura3Δ trk1Δ::URA3 trk2Δ::NATMX bsd2Δ::KANMX</i>                                           | This study                               |
| <i>trk1Δtrk2Δvps5</i>        | <i>MATα his3Δ leu2Δ ura3Δ trk1Δ::URA3 trk2Δ::NATMX vps5Δ::KANMX</i>                                           | This study                               |
| <i>trk1Δtrk2Δvps35Δ</i>      | <i>MATα his3Δ leu2Δ ura3Δ trk1Δ::URA3 trk2Δ::NATMX vps35Δ::KANMX</i>                                          | (Kolb et al, 2014)                       |
| RSP5                         | <i>MATα his3 lys2 trp1 ura3 prc1::TRP1 rsp5::HIS3 leu2::RSP5:LEU2 bar1::HIS3</i>                              | (Dunn et al, 2001)                       |
| <i>rsp5-2</i>                | <i>MATα his3 lys2 trp1 ura3 prc1::TRP1 rsp5::HIS3 leu2::rsp5-2:LEU2 bar1::HIS3</i>                            | (Dunn et al, 2001)                       |
| <i>Snf7-RFP</i>              | <i>MATα his3Δ1 leu2Δ0 lys2Δ0 ura3Δ0 Snf7-RFP::KANMX</i>                                                       | (Huh et al, 2003)                        |

Supplementary Table S3. Oligonucleotides used in this study

| Name            | Purpose                                                | Sequence (5'-3')                           |
|-----------------|--------------------------------------------------------|--------------------------------------------|
| KanB            | Confirm all strains deleted with KANMX                 | ctgcagcaggagccgtaat                        |
| Vps3_Ext_Fwd    | Confirm deletion of <i>VPS3</i>                        | gacagagaatctaggctgtc                       |
| Vps3_Int_Rev    | Confirm deletion of <i>VPS3</i>                        | tgaggtaggattcgctatc                        |
| Vps8_Ext_Fwd    | Confirm deletion of <i>VPS8</i>                        | ggtgtaggagttatggtgg                        |
| Vps8_Int_Rev    | Confirm deletion of <i>VPS8</i>                        | aagttgcatgagactacgg                        |
| Vps36_Ext_Fwd   | Confirm deletion of <i>VPS36</i>                       | ggcgtagcgacatattaagaag                     |
| Vps36_Int_Rev   | Confirm deletion of <i>VPS36</i>                       | cgcactttaccaagttcatc                       |
| Vps20_Ext_Fwd   | Confirm deletion of <i>VPS20</i>                       | gacttggaataacctgtggg                       |
| Vps20_Int_Rev   | Confirm deletion of <i>VPS20</i>                       | acttctaggatcgcctatc                        |
| Snf7_Ext_Fwd    | Confirm deletion of <i>SNF7</i>                        | gacaacgatggagtccgtaac                      |
| Snf7_Int_Rev    | Confirm deletion of <i>SNF7</i>                        | cgccattactttattgcccttcg                    |
| Pep12_Ext_Fwd   | Confirm deletion of <i>PEP12</i>                       | ccctttctcacacagtggcatc                     |
| Pep12_Int_Rev   | Confirm deletion of <i>PEP12</i>                       | ctatctttgccacagatctc                       |
| Gos1_Ext_Fwd    | Confirm deletion of <i>GOS1</i>                        | gctccgaatgtgcatttcacag                     |
| Gos1_Int_Rev    | Confirm deletion of <i>GOS1</i>                        | gattacatcctgtctctggcc                      |
| Bsd2_Ext_Fwd    | Confirm deletion of <i>BSD2</i>                        | ccggagatgtaaataaccgtgg                     |
| Bsd2_Int_Rev    | Confirm deletion of <i>BSD2</i>                        | tgttccctcgtcctctatg                        |
| Vps5_Ext_Fwd    | Confirm deletion of <i>VPS5</i>                        | cggaagttgtccgctaagaac                      |
| Vps5_Int_Rev    | Confirm deletion of <i>VPS5</i>                        | gtctttccattctggcgcac                       |
| Nhx1_Ext_Fwd    | Confirm deletion of <i>NXH1</i>                        | ctagctactctaagataaagggc                    |
| Nhx1_Int_Rev    | Confirm deletion of <i>NXH1</i>                        | cttgattcaactcgtaccac                       |
| Vps23_Ext_Fwd   | Confirm deletion of <i>VPS23</i>                       | ggacgcgcagagagttagta                       |
| Vps23_Int_Rev   | Confirm deletion of <i>VPS23</i>                       | gtcagagtgcgtaaatacce                       |
| Venus_BamHI_Fwd | Construction of pRS415-Vn-ROMK <sub>K80M</sub> plasmid | catcatggatccatggtgagcaagggcgagga           |
| ROMK_SmaI_Rev   | Construction of pRS415-Vn-ROMK <sub>K80M</sub> plasmid | catcatcccgggttacattttggtgtcatctgttca       |
| YangP1          | Construction of pRS415-Vn-ROMK <sub>K80M</sub> plasmid | gctggacctgaaatggaggtacatgatgacctgttcatcac  |
| YangP2          | Construction of pRS415-Vn-ROMK <sub>K80M</sub> plasmid | gaaggtgtgatgaacacggtecatcatgtacctccatttcag |
| TSG101 siRNA 1  | Silencing <i>TSG101</i> transcript                     | CCAAAUACUUCCUACAUGCdtdt                    |
| TSG101 siRNA 2  | Silencing <i>TSG101</i> transcript                     | CCGUUUAGAUCAAGAAGUAdtdt                    |
| HGS siRNA 1     | Silencing <i>HGS</i> transcript                        | GAACCCACACGUCGCCUUGdtdt                    |
| HGS siRNA 2     | Silencing <i>HGS</i> transcript                        | GAGGUA AACGUCCGUAAACAdtdt                  |
| VPS8 siRNA 1    | Silencing <i>VPS8</i> transcript                       | GCAUCUUCACCUAUACUAUdtdt                    |
| VPS8 siRNA 2    | Silencing <i>VPS8</i> transcript                       | GCACUUUGGUUCCGUUAUdtdt                     |

Supplemental Table S4. Antibodies used in this study

| <b>Target</b>                     | <b>Species of Origin</b> | <b>Source</b>                          | <b>Catalog #</b> | <b>Lot #<br/>(If Available)</b> |
|-----------------------------------|--------------------------|----------------------------------------|------------------|---------------------------------|
| Hemagglutinin (HA) HRP-conjugated | Donkey                   | Roche                                  | 12013819001      | 23551600                        |
| G6PD                              | Rabbit                   | Sigma-Aldrich                          | A9521            | n/a                             |
| Sec61                             | Rabbit                   | (Stirling et al. 1992)                 | n/a              | n/a                             |
| Pma1                              | Mouse                    | Abcam (Cambridge, UK)                  | ab4645           | 40B7                            |
| GFP                               | Mouse                    | Roche                                  | 11814460001      | 14442000                        |
| ROMK                              | Rabbit                   | (Wade et al. 2011)                     | n/a              | n/a                             |
| Hsp90                             | Mouse                    | Enzo Life Sciences, Farmingdale, NY    | ADI-SPA-830-D    | 01101340                        |
| ATP1A                             | Mouse                    | Santa Cruz Biotechnology, Dallas, TX   | C464.6           | sc-21712                        |
| TSG101                            | Mouse                    | GeneTex, Irvine, CA                    | GTX70255         | 4A10                            |
| HGS                               | Mouse                    | Abcam                                  | ab56468          | n/a                             |
| VPS8                              | Rabbit                   | Proteintech, Rosemont, IL              | 15079-1-AP       | n/a                             |
| $\beta$ -actin                    | Mouse                    | Abcam,                                 | ab6276           | n/a                             |
| Rabbit IgG (HRP-conjugated)       | Goat                     | Cell Signaling Technology, Beverly, MA | 7074S            | 26                              |
| Mouse IgG (HRP-conjugated)        | Goat                     | Cell Signaling Technology, Beverly, MA | 7076S            | 29                              |
